# Supplementary material
Source: ML conference proceedings conference paper supplement (https://openreview.net/forum?id=FuTfZK7PK3)
Supplement: supplementary_material [file attachment]

---

# The Power of Extrapolation in Federated Learning

---

Anonymous Author(s)

Affiliation

Address

email

## Abstract

1 We propose and study several server-extrapolation strategies for enhancing the  
2 theoretical and empirical convergence properties of the popular federated learning  
3 optimizer [FedProx](#) [Li et al., 2020]. While it has long been known that some form  
4 of extrapolation can help in the practice of FL, only a handful of works provide any  
5 theoretical guarantees. The phenomenon seems elusive, and our current theoretical  
6 understanding remains severely incomplete. In our work, we focus on smooth  
7 convex or strongly convex problems in the interpolation regime. In particular,  
8 we propose Extrapolated [FedProx](#) ([FedExProx](#)), and study three extrapolation  
9 strategies: a constant strategy (depending on various smoothness parameters and  
10 the number of participating devices), and two smoothness-adaptive strategies;  
11 one based on the notion of gradient diversity ([FedExProx-GrADS](#)), and the other  
12 one based on the stochastic Polyak stepsize ([FedExProx-StoPS](#)). Our theory is  
13 corroborated with carefully constructed numerical experiments.

## 14 1 Introduction

15 Federated learning (FL) is a distributed training approach for machine learning models, where multiple  
16 clients collaborate under the guidance of a central server to optimize a loss function. [[Konečný](#)  
17 [et al., 2016](#), [McMahan et al., 2017](#)]. This method allows clients to contribute to model training while  
18 keeping their data private, as it avoids the need for direct data sharing. Often, federated optimization  
19 is formulated as the minimization of a finite-sum objective function,

$$\min_{x \in \mathbb{R}^d} \left\{ f(x) := \frac{1}{n} \sum_{i=1}^n f_i(x) \right\}, \quad (1)$$

20 where each  $f_i : \mathbb{R}^d \mapsto \mathbb{R}$  is the empirical risk of model  $x$  associated with the  $i$ -th client. The federated  
21 averaging method ([FedAvg](#)) is among the most favored strategies for addressing federated learning  
22 problems, as proposed by [McMahan et al. \[2017\]](#), [Mangasarian and Solodov \[1993\]](#). In [FedAvg](#), the  
23 server initiates an iteration by selecting a subset of clients for participation in a given round. Each  
24 chosen client then proceeds with local training, employing gradient-based techniques like gradient  
25 descent ([GD](#)) or stochastic gradient descent ([SGD](#)) with random reshuffling, as discussed by [Bubeck](#)  
26 [et al. \[2015\]](#), [Gower et al. \[2019\]](#), [Moulines and Bach \[2011\]](#), [Sadiev et al. \[2022\]](#).

27 [Li et al. \[2020\]](#) proposed replacing the local training of each client via [SGD](#) in [FedAvg](#) with the  
28 computation of a proximal term, resulting in the [FedProx](#) algorithm.

$$x_{k+1} = \frac{1}{n} \sum_{i=1}^n \text{prox}_{\gamma f_i}(x_k), \quad (2)$$

29 where  $\gamma > 0$  is the step size, and the proximal operator is defined as

$$\text{prox}_{\gamma f_i}(x) := \arg \min_{z \in \mathbb{R}^d} \left\{ f_i(z) + \frac{1}{2\gamma} \|z - x\|^2 \right\}.$$

Contrary to gradient-based methods like [GD](#) and [SGD](#), algorithms based on proximal operation, such as proximal point method ([PPM](#)) [[Rockafellar, 1976](#), [Parikh et al., 2014](#)] and stochastic proximal point methods ([SPPM](#)) [[Asi and Duchi, 2019](#), [Bertsekas, 2011](#), [Khaled and Jin, 2022](#), [Patrascu and Necoara, 2018](#), [Richtárik and Takác, 2020](#)] benefit from stability against inaccuracies in learning rate specification [[Ryu and Boyd, 2014](#)]. Indeed, for [GD](#) and [SGD](#), a step size that is excessively large can result in divergence of the algorithm, whereas a step size that is too small can significantly deteriorate the convergence rate of the algorithm. [PPM](#) was formally introduced and popularized by the seminal paper of [Rockafellar \[1976\]](#) to solve the variational inequality problems. In practice, the stochastic variant [SPPM](#) is more frequently used.

It is known that the proximal operator applied to a proper, closed and convex function can be viewed as the projection to some level set of the same function depending on the value of  $\gamma$ . In particular, if we let each  $f_i$  be the indicator function of a nonempty closed convex set  $\mathcal{X}_i$ , then  $\text{prox}_{\gamma f_i}(\cdot)$  becomes the projection  $\Pi_{\mathcal{X}_i}(\cdot)$  onto the set  $\mathcal{X}_i$ . In this case, [FedProx](#) in (2) becomes the parallel projection method for convex feasibility problem [[Censor et al., 2001, 2012](#), [Combettes, 1997a](#), [Necoara et al., 2019](#)], if we additionally assume

$$\mathcal{X} := \bigcap_{i=1}^n \mathcal{X}_i \neq \emptyset.$$

A well known fact about the parallel projection method is that its empirical efficiency can often be improved by extrapolation [[Combettes, 1997a](#), [Necoara et al., 2019](#)]. This involves moving further along the line that connects the last iterate  $x_k$  and the average projection point, resulting in the iteration

$$x_{k+1} = x_k + \alpha_k \left( \frac{1}{n} \sum_{i=1}^n \Pi_{\mathcal{X}_i}(x_k) - x_k \right), \quad (3)$$

where  $\alpha_k \geq 1$  defines extrapolation level. Despite the various heuristic rules proposed over the years for setting  $\alpha_k$  [[Bauschke et al., 2006](#), [Censor et al., 2001](#), [Combettes, 1997b](#)], which have demonstrated satisfactory practical performance, it was only recently that the theoretical foundation explaining the success of extrapolation techniques for solving convex feasibility problems was unveiled by [Necoara et al. \[2019\]](#), where the authors considered randomized version of (3) named Randomized Projection Method ([RPM](#)). The practical success of extrapolation has spurred numerous extensions of existing algorithms. Notably, [Jhunjunwala et al. \[2023\]](#) combined [FedAvg](#) with extrapolation, resulting in [FedExP](#), leveraging insights from an effective heuristic rule [[Combettes, 1997b](#)] for setting  $\alpha_k$  as follows:

$$\alpha_k = \frac{\sum_{i=1}^n \|x_k - \Pi_{\mathcal{X}_i}(x_k)\|^2}{\left\| \sum_{i=1}^n (x_k - \Pi_{\mathcal{X}_i}(x_k)) \right\|^2}. \quad (4)$$

However, the authors did not consider the case of a constant extrapolation parameter, nor did they disclose the relationship between the extrapolation parameter and the stepsize of [SGD](#). The extrapolation parameter can be viewed as a server side stepsize in the context of federated learning, its effectiveness was discussed by [Malinovsky et al. \[2022\]](#).

## 1.1 Contributions

Our paper contributes in the following ways; for the notations used please refer to [Appendix A](#).

- Based on the insights gained from the convex feasibility problem, we extend [FedProx](#) to its extrapolated counterpart [FedExProx](#) for both convex and strongly<sup>1</sup> convex interpolation problems (See [Table 1](#)). By optimally setting the constant extrapolation parameter, we obtain iteration complexity  $\mathcal{O}\left(\frac{L_\gamma(1+\gamma L_{\max})}{\epsilon}\right)^2$  in the convex case and  $\mathcal{O}\left(\frac{L_\gamma(1+\gamma L_{\max})}{\mu} \log\left(\frac{1}{\epsilon}\right)\right)$  in the strongly convex case, when all the clients participate in the training (full participation). We reveal the dependence of the optimal extrapolation parameter on smoothness, indicating that simply averaging the iterates from local training on the server is suboptimal. Instead,

<sup>1</sup>Strongly convex:  $f$  is  $\mu$ -strongly convex.

<sup>2</sup>As we later see in [Theorem 1](#), here  $L_{\max} = \max_{i \in [n]} L_i$ , where each  $L_i$  is the smoothness of  $f_i$ ,  $L_\gamma$  is the smoothness constant of  $M^\gamma = \frac{1}{n} \sum_{i=1}^n M_{f_i}^\gamma$ .

Table 1: General comparison of **FedExP**, **RPM** and **FedExProx** in terms of conditions and convergence. Each entry indicates whether the method has the corresponding feature (✓) or not (✗). We use the sign “—” where a feature is not applicable to the corresponding method.

| Features                                                     | FedExP | RPM <sup>a</sup> | FedExProx |
|--------------------------------------------------------------|--------|------------------|-----------|
| Does not require interpolation regime                        | ✓      | ✗                | ✗         |
| Does not require convexity <sup>b</sup>                      | ✓      | ✗                | ✗         |
| Acceleration in the strongly convex setting <sup>c</sup>     | ✗      | ✓                | ✓         |
| Does not require smoothness <sup>d</sup>                     | ✗      | ✓                | ✓         |
| Allows for partial participation of clients <sup>e</sup>     | ✗      | ✓                | ✓         |
| Works with constant extrapolation parameter                  | ✗      | ✓                | ✓         |
| Smoothness and partial participation influence extrapolation | ✗      | ✓                | ✓         |
| Semi-adaptivity <sup>f</sup>                                 | ✗      | —                | ✓         |

<sup>a</sup> **RPM** refers to the randomized projection method of [Necoara et al. \[2019\]](#). Our method includes it as a special case, see Remark 12

<sup>b</sup> Convexity: local objective  $f_i$  is convex, which is the indicator function of the convex set  $\mathcal{X}_i$  in **RPM**.

<sup>c</sup> The strong convexity pertains to  $f$ , and for **RPM**, it indicates that the linear regularity condition is satisfied.

<sup>d</sup> Smoothness:  $f_i$  is  $L_i$ -smooth. Our algorithm also applies in the non-smooth case; see Appendix F.2.

<sup>e</sup> [Jhunjunwala et al. \[2023\]](#) provides no convergence guarantee for client partial participation setting.

<sup>f</sup> The concept of “semi-adaptivity” is explained in Remark 9.

extrapolation should be applied to achieve faster convergence. Specifically, compared to **FedProx** with the same step size  $\gamma$ , our method is always at least  $2 + \frac{1}{\gamma L_{\max}} + \gamma L_{\max}$  times better in terms of iteration complexity, see Remark 5.

- Our method, **FedExProx**, improves upon the worst-case iteration complexity  $\mathcal{O}\left(\frac{L_{\max}}{\epsilon}\right)$  of **FedExP** [[Jhunjunwala et al., 2023](#)] to  $\mathcal{O}\left(\frac{L_{\gamma}(1+\gamma L_{\max})}{\epsilon}\right)$  (See Table 2). The improvement could lead to acceleration up to a factor of  $n$ , see Remark 6. Furthermore, we extend **FedExProx** to client partial participation setting, showing the dependence of optimal extrapolation parameter on  $\tau$  which is the number of clients participating in the training and the benefits of a larger  $\tau$ . In particular, we show that compared to the single client setting, with complexity  $\mathcal{O}\left(\frac{L_{\max}}{\epsilon}\right)$ , the full participation version enjoys a speed-up up to a factor of  $n$ , see Remark 7.
- Our theory uncovers the relationship between the extrapolation parameter and the step size in typical gradient-type methods, leveraging the power of the Moreau envelope. We also recover **RPM** of [Necoara et al. \[2019\]](#) as a special case in our analysis (see Remark 12), and show that the heuristic outlined in (4), is in fact a step size based on gradient diversity [[Horváth et al., 2022](#), [Yin et al., 2018](#)] for the Moreau envelopes of client functions.
- Building on the insights from [Horváth et al. \[2022\]](#), we propose two adaptive rules for determining the extrapolation parameter: based on gradient diversity (**FedExProx-GrADS**), and the stochastic Polyak step size (**FedExProx-StoPS**) [[Horváth et al., 2022](#), [Loizou et al., 2021](#)]. The proposed methods eliminate reliance on the unknown smoothness constant and exhibit “semi-adaptivity”, meaning the algorithm converges with any local step size  $\gamma$  and by selecting a sufficiently large  $\gamma$ , we ensure that we lose at most a factor of 2 in iteration complexity.
- We validate our theory with numerical experiments. Numerical evidence suggests that **FedExProx** achieves a  $2\times$  or higher speed-up in terms of iteration complexity compared to **FedProx** and improved performance compared to **FedExP**. The framework and the plots are included in the Appendix.

## 1.2 Related work

**Stochastic gradient descent.** **SGD** [[Robbins and Monro, 1951](#), [Ghadimi and Lan, 2013](#), [Gower et al., 2019](#), [Gorbunov et al., 2020](#)] stands as a cornerstone algorithm utilized across the fields of machine learning. In its simplest form, the algorithm is written as  $x_{k+1} = x_k - \eta \cdot g(x_k)$ , where  $\eta > 0$  is a scalar step size,  $g(x_k)$  represents a stochastic estimator of the true gradient  $\nabla f(x_k)$ . We recover

Table 2: Comparison of convergence of [FedExp](#), [FedExProx](#), [FedExProx-GraDS](#) and [FedExProx-StoPS](#). The local step size of [FedExp](#) is set to be the largest possible value  $1/6tL$  in the full batch case, where  $t$  is the number of local iterations of [GD](#) performed. We assume the assumptions of Theorem 1 also hold here. The notations are introduced in Theorem 1 and Theorem 2. The convergence for our methods are described for arbitrary  $\gamma > 0$ . We use  $K$  to denote the total number of iterations. For [FedExProx](#), optimal constant extrapolation is used. The  $\mathcal{O}(\cdot)$  notation is hidden for all complexities in this table.

| Method                                | Full Participation                                                 |                                                                  |                                |
|---------------------------------------|--------------------------------------------------------------------|------------------------------------------------------------------|--------------------------------|
|                                       | General Case                                                       | Best Case                                                        | Worst Case                     |
| <a href="#">FedExp</a>                | $6L_{\max}/\sum_{k=0}^{K-1} \alpha_{k,P}^a$                        | $6L_{\max}/\sum_{k=0}^{K-1} \alpha_{k,P}$                        | $6L_{\max}/K$                  |
| <a href="#">FedExProx</a> (New)       | $L_{\gamma}(1+\gamma L_{\max})/K^b$                                | $L_{\max}/nK$                                                    | $L_{\max}/K$                   |
| <a href="#">FedExProx-GraDS</a> (New) | $(1+\gamma L_{\max})/\gamma \cdot \sum_{k=0}^{K-1} \alpha_{k,G}^c$ | $(1+\gamma L_{\max})/\gamma \cdot \sum_{k=0}^{K-1} \alpha_{k,G}$ | $(1+\gamma L_{\max})/\gamma K$ |
| <a href="#">FedExProx-StoPS</a> (New) | $(1+\gamma L_{\max})/\gamma \cdot \sum_{k=0}^{K-1} \alpha_{k,S}^d$ | $(1+\gamma L_{\max})/\gamma \cdot \sum_{k=0}^{K-1} \alpha_{k,S}$ | $(1+\gamma L_{\max})/\gamma K$ |

<sup>a</sup> The  $\alpha_{k,P}$  here is determined according to the theory of [Jhunjunwala et al. \[2023\]](#).

<sup>b</sup> We have  $L_{\gamma}(1+\gamma L_{\max}) \leq L_{\max}$ , see Remark 6.

<sup>c</sup> We leave out a factor of  $\frac{1+\gamma L_{\max}}{2+\gamma L_{\max}}$  which is a constant between  $(\frac{1}{2}, 1)$ .

<sup>d</sup> See Remark 11 for a lower bound of  $\alpha_{k,S}$ , using which we can rewrite the rate as  $\frac{L_{\gamma}(1+\gamma L_{\max})}{K}$ .

[GD](#) when  $g(x_k) = \nabla f(x_k)$ . The evolution of [SGD](#) has been marked by significant advancements since its introduction by [Robbins and Monro \[1951\]](#), leading to various adaptations like stochastic batch gradient descent [[Nemirovski et al., 2009](#)] and compressed gradient descent [[Alistarh et al., 2017](#), [Khirirat et al., 2018](#)]. [Gower et al. \[2019\]](#) presented a framework for analyzing [SGD](#) with arbitrary sampling strategies in the convex setting based on expected smoothness, which was later extended by [Gorbunov et al. \[2020\]](#) to the case of local [SGD](#). While many methods have been crafted to leverage the stochastic nature of  $g(x_k)$ , substantial research efforts are also dedicated to finding a better stepsize. An illustration of this is the coordinate-wise adaptive step size [Adagrad](#) [[Duchi et al., 2011](#)]. Another approach involves employing matrix step size, as demonstrated by [Safaryan et al. \[2021\]](#), [Li et al. \[2024\]](#). Our analysis builds on the theory of [SGD](#) mainly adapted from [Gower et al. \[2019\]](#) with additional consideration on the upper bound of the step size.

**Stochastic proximal point method.** [PPM](#) was first introduced by [Rockafellar \[1976\]](#) to address the problems of variational inequalities at its inception. Its transition to stochastic case, motivated by the need to efficiently solve large scale optimization problems, results in [SPPM](#). It is often assumed that the proximity operator can be computed efficiently for the algorithm to be practical. Over the years, [SPPM](#) has been the subject of extensive research, as documented by [Bertsekas \[2011\]](#), [Bianchi \[2016\]](#), [Patrascu and Necoara \[2018\]](#). Unlike traditional gradient-based methods, [SPPM](#) is more robust to inaccuracies in learning rate specifications, as demonstrated by [Ryu and Boyd \[2014\]](#). [Asi and Duchi \[2019\]](#) studied [APROX](#), which includes [SPPM](#) as the special case using the full proximal model; [APROX](#) was later extended into minibatch case by [Asi et al. \[2020\]](#). However, this extension was based on model averaging rather than iterate averaging. The convergence rate of [SPPM](#) has been analyzed in various contexts by [Khaled and Jin \[2022\]](#), [Ryu and Boyd \[2014\]](#), [Yuan and Li \[2022\]](#), revealing that its performance does not surpass that of [SGD](#) in non-convex regimes.

**Projection onto convex sets.** The projection method originated from efforts to solve systems of linear equations or linear inequalities [[Kaczmarz, 1937](#), [Von Neumann, 1949](#), [Motzkin and Schoenberg, 1954](#)]. Subsequently, it was generalized to address the convex feasibility problem [[Combettes, 1997b](#)]. Typically, the method involves projecting onto a set  $\mathcal{X}_i$ , where  $i$  is determined through sampling or other strategies. A particularly relevant method to our paper is the parallel projection method, in which individual projections onto the sets are performed in parallel, and their results are averaged in order to produce the next iterate. It is well-established experimentally that the parallel projection method can be accelerated through extrapolation, with numerous successful heuristics having been proposed to adaptively set the extrapolation parameter [[Bauschke et al., 2006](#),

Pierra, 1984]. However, only recently a theory was proposed by Necoara et al. [2019] to explain this phenomenon. Necoara et al. [2019] introduced stochastic reformulations of the convex feasibility problem and revealed how the optimal extrapolation parameter depends on the smoothness of the setting and the size of the minibatch. A better result under a linear regularity condition, which is connected to strong convexity, was also obtained. However, the explanation provided by Necoara et al. [2019] was not satisfactory, as it failed to clarify why adaptive rules based on gradient diversity are effective.

**Moreau envelope.** The concept of the Moreau envelope, also known as Moreau-Yosida regularization, was first introduced by Moreau [1965] as a mathematical tool for handling non-smooth functions. A particularly relevant property of the Moreau envelope is that executing proximal minimization algorithms on the original objective is equivalent to applying gradient methods to its Moreau envelope [Ryu and Boyd, 2014]. Based on this observation, Davis and Drusvyatskiy [2019] conducted an analysis of several methods, including SPPM for weakly convex and Lipschitz functions. The properties of the Moreau envelope and its applications have been thoroughly investigated in many works including Jourani et al. [2014], Planiden and Wang [2016, 2019]. Beyond its role in proximal minimization algorithms, the Moreau envelope has been utilized in the contexts of personalized federated learning [T Dinh et al., 2020] and meta-learning [Mishchenko et al., 2023].

**Adaptive step size.** One of the most crucial hyperparameters in training machine learning models with gradient-based methods is the step size. For GD and SGD, determining the step size often depends on the smoothness parameter, which is typically unknown, posing challenges in practical step size selection. There has been a growing interest in adaptive step sizes, leading to the development of numerous adaptive methods that enable real-time computation of the step size. Examples include Adagrad [Duchi et al., 2011], RMSProp [Hinton et al.], and ADAM [Kingma and Ba, 2015]. Recently, several studies have attempted to extend the Polyak step size beyond deterministic settings, leading to the development of the stochastic Polyak step size [Richtárik and Takác, 2020, Horváth et al., 2022, Loizou et al., 2021, Orvieto et al., 2022]. Gradient diversity, first introduced by Yin et al. [2018], was subsequently analyzed theoretically by Horváth et al. [2022].

## 2 Preliminaries

We now introduce the several definitions and assumptions that are used throughout the paper.

**Definition 1** (Proximity operator). *The proximity operator of an extended-real-valued function  $\phi : \mathbb{R}^d \mapsto \mathbb{R} \cup \{+\infty\}$  with step size  $\gamma > 0$  is defined as*

$$\text{prox}_{\gamma\phi}(x) := \arg \min_{z \in \mathbb{R}^d} \left\{ \phi(z) + \frac{1}{2\gamma} \|z - x\|^2 \right\}.$$

It is known that for a proper, closed and convex function  $\phi$ , the minimizer of  $\phi(z) + \frac{1}{2\gamma} \|z - x\|^2$  exists and is unique.

**Definition 2** (Moreau envelope). *The Moreau envelope of an extended-real-valued function  $\phi : \mathbb{R}^d \mapsto \mathbb{R} \cup \{+\infty\}$  with step size  $\gamma > 0$  is defined as*

$$M_\phi^\gamma(x) := \min_{z \in \mathbb{R}^d} \left\{ \phi(z) + \frac{1}{2\gamma} \|z - x\|^2 \right\}.$$

The following assumptions are used in our analysis. We use the notation  $[n]$  for the set  $\{1, \dots, n\}$ .

**Assumption 1** (Differentiability). *The function  $f_i$  in (1) is differentiable for all  $i \in [n]$ .*

**Assumption 2** (Interpolation regime). *There exists  $x_* \in \mathbb{R}^d$  such that  $\nabla f_i(x_*) = 0$  for all  $i \in [n]$ .*

Note that Assumption 2 indicates that each  $f_i$  and  $f$  are lower bounded. In this paper, we focus on cases where the interpolation regime holds. This assumption often holds in modern deep learning which are overparameterized where the number of parameters greatly exceeds the number of data points, as justified by Arora et al. [2019], Montanari and Zhong [2022]. Our motivation for this assumption partly arises from the convex feasibility problem [Combettes, 1997a, Necoara et al., 2019], wherein the intersection  $\mathcal{X}$  is presumed nonempty. This is equivalent to assuming that the interpolation regime holds when  $f_i$  is the indicator function of the nonempty closed convex set  $\mathcal{X}_i$ . Further motivations derived from the proof for this assumption will be discussed later.

---

**Algorithm 1** Extrapolated SPPM (FedExProx) with partial client participation

---

- 1: **Parameters:** extrapolation parameter  $\alpha_k > 0$ , step size for the proximity operator  $\gamma > 0$ , starting point  $x_0 \in \mathbb{R}^d$ , number of clients  $n$ , total number of iterations  $K$ , number of clients participate in the training  $\tau$ , for simplicity, we use  $\tau$ -nice sampling as an example
- 2: **for**  $k = 0, 1, 2 \dots K - 1$  **do**
- 3:   The server samples  $S_k \subseteq \{1, 2, \dots, n\}$  uniformly from all subsets of cardinality  $\tau$
- 4:   The server computes

$$x_{k+1} = x_k + \alpha_k \left( \frac{1}{\tau} \sum_{i \in S_k} \text{prox}_{\gamma f_i}(x_k) - x_k \right). \quad (7)$$

5: **end for**

---

181 **Assumption 3** (Convexity). *The function  $f_i : \mathbb{R}^d \mapsto \mathbb{R}$  is convex for all  $i \in [n]$ . This means that for*  
 182 *each  $f_i$ ,*

$$0 \leq f_i(x) - f_i(y) - \langle \nabla f_i(y), x - y \rangle, \quad \forall x, y \in \mathbb{R}^d. \quad (5)$$

183 **Assumption 4** (Smoothness). *Function  $f_i : \mathbb{R}^d \mapsto \mathbb{R}$  is  $L_i$ -smooth,  $L_i > 0$  for all  $i \in [n]$ . This*  
 184 *means that for each  $f_i$ ,*

$$f_i(x) - f_i(y) - \langle \nabla f_i(y), x - y \rangle \leq \frac{L_i}{2} \|x - y\|^2, \quad \forall x, y \in \mathbb{R}^d. \quad (6)$$

185 We will use  $L_{\max}$  to denote  $\max_{i \in [n]} L_i$ .

186 It is important to note that the smoothness assumption here is not necessary to obtain a convergence  
 187 result, see Appendix F.2 for the detail. We introduce this assumption to highlight how the optimal  
 188 extrapolation parameter depends on smoothness if it is present. The following strong convexity  
 189 assumption is introduced that, if adopted, enables us to achieve better results.

190 **Assumption 5** (Strong convexity). *The function  $f$  is  $\mu$ -strongly convex,  $\mu > 0$ . That is*

$$f(x) - f(y) - \langle \nabla f(y), x - y \rangle \geq \frac{\mu}{2} \|x - y\|^2, \quad \forall x, y \in \mathbb{R}^d.$$

191 We first present our algorithm FedExProx as Algorithm 1. In the subsequent sections, we first present  
 192 the theory in the stochastic setting for FedExProx with a fixed extrapolation parameter in Section 3.  
 193 Then we proceed to adaptive versions of our algorithm which eliminates the dependence on the  
 194 unknown smoothness constant in Section 4.

### 195 3 Constant extrapolation

196 In order to demonstrate the convergence result of our algorithm in the stochastic setting, we use  
 197  $\tau$ -nice sampling as the way of selecting clients for partial participation. This refers to that in each  
 198 iteration, the server samples a set  $S_k \subseteq \{1, 2, \dots, n\}$  uniformly at random from all subsets of size  $\tau$ .  
 199 We want to emphasize that the sampling strategy here is merely an example, it is possible to use other  
 200 client sampling strategies.

201 **Theorem 1.** *Suppose Assumption 1 (Differentiability), Assumption 2 (Interpolation regime), Assump-*  
 202 *tion 3 (Convexity) and Assumption 4 (Smoothness) hold. If we use a fixed extrapolation parameter*  
 203  *$\alpha_k = \alpha \in \left(0, \frac{2}{\gamma L_{\gamma, \tau}}\right)$  and any step size  $0 < \gamma < +\infty$ , then the average iterate of Algorithm 1*  
 204 *satisfies*

$$\mathbb{E}[f(\bar{x}_K)] - \inf f \leq C(\gamma, \tau, \alpha) \cdot \frac{\|x_0 - x_\star\|^2}{K},$$

205 where  $K$  is the number of iteration,  $\bar{x}_K$  is sampled uniformly at random from the first  $K$  iterates  
 206  $\{x_0, x_1, \dots, x_{K-1}\}$ ,  $C(\gamma, \tau, \alpha)$  is defined as

$$C(\gamma, \tau, \alpha) := \frac{1 + \gamma L_{\max}}{\alpha \gamma (2 - \alpha \gamma L_{\gamma, \tau})} \quad \text{and} \quad L_{\gamma, \tau} := \frac{n - \tau}{\tau(n - 1)} \frac{L_{\max}}{1 + \gamma L_{\max}} + \frac{n(\tau - 1)}{\tau(n - 1)} L_{\gamma},$$



where  $L_{\max} = \max_i L_i$ ,  $L_\gamma$  is the smoothness constant of  $M^\gamma(x) := \frac{1}{n} \sum_{i=1}^n M_{f_i}^\gamma(x)$ . If we fix  $\gamma$  and  $\tau$  the optimal constant extrapolation parameter is given by  $\alpha_{\gamma,\tau} := \frac{1}{\gamma L_{\gamma,\tau}} > 1$ , which results in the following convergence guarantee:

$$\mathbb{E}[f(\bar{x}_K)] - \inf f \leq C(\gamma, \tau, \alpha_{\gamma,\tau}) \cdot \frac{\|x_0 - x_\star\|^2}{K} = L_{\gamma,\tau} (1 + \gamma L_{\max}) \cdot \frac{\|x_0 - x_\star\|^2}{K}.$$

The proof of this theorem relies on the reformulation of the update rule in (7), using the identity  $\nabla M_{f_i}^\gamma(x) = \frac{1}{\gamma} (x - \text{prox}_{\gamma f_i}(x))$  given in Lemma 2, which holds for any  $x \in \mathbb{R}^d$ , into the following form:

$$x_{k+1} = x_k - \alpha_k \cdot \gamma \cdot \frac{1}{n} \sum_{i \in S_k} \nabla M_{f_i}^\gamma(x_k). \quad (8)$$

We can then apply our modified theory for **SGD** given in Theorem 3, which is adapted from Gower et al. [2019], to obtain function value suboptimality in terms of  $M^\gamma(x)$ . The results are then translated back to function value suboptimality in terms of  $f$ . Note that (8) unveils the connection between the step size of gradient type methods and extrapolation parameter in our case.

**Remark 1.** Theorem 1 provides convergence guarantee for Algorithm 1 in the convex case. If in addition, we assume Assumption 5 (Strong convexity) holds, the rate can be improved and we obtain linear convergence. See Corollary 1 for the details.

**Remark 2.** Theorem 1 indicates convergence for any  $0 < \gamma < +\infty$ . Indeed, as it is proved by Lemma 7, we have  $C(\gamma, \tau, \alpha_{\gamma,\tau}) = L_{\gamma,\tau} (1 + \gamma L_{\max}) \leq L_{\max}$  holds for any  $0 < \gamma < +\infty$ . In cases where there exists at least one  $L_i < L_{\max}$ , we have  $C(\gamma, \tau, \alpha_{\gamma,\tau}) < L_{\max}$ . This shows that the algorithm is successfully managing data heterogeneity

**Remark 3.** One may question the necessity of the interpolation regime assumption. This assumption is crucial to our analysis. Besides allowing us to revisit the convex feasibility problem setting, it also guarantees that  $M^\gamma(x)$  has the same set of minimizers as  $f(x)$  as illustrated by Lemma 8. It also allows us to improve the upper bound on the step size by a factor of 2 in the **SGD** theory, which is demonstrated in Theorem 3 in the Appendix.

**Remark 4.** From the reformulation presented in (8), we see the best extrapolation parameter is obtained when  $\alpha_k \gamma$  is the best step size for **SGD** running on global objective  $M^\gamma(x)$ . Since the best step size is affected by the smoothness and the minibatch size, so is the best extrapolation parameter.

We can also compare our algorithm with **FedProx** in the convex overparameterized regime.

**Remark 5.** Our algorithm includes **FedProx** as a special case when  $\alpha = 1$ . To recover its result, we simply plug in  $\alpha = 1$ , the resulting condition number is  $C(\gamma, \tau, 1) = \frac{1+\gamma L_{\max}}{\gamma(2-\gamma L_{\gamma,\tau})}$ . Compared to **FedProx**, Algorithm 1 with the same  $\gamma > 0$  demonstrates superior performance, with the acceleration factor being quantified by

$$\frac{C(\gamma, \tau, 1)}{C(\gamma, \tau, \alpha_{\gamma,\tau})} \geq 2 + \frac{1}{\gamma L_{\max}} + \gamma L_{\max} \geq 4.$$

See Lemma 14 for the proof. This suggests that the approach of the server averaging all iterates following local computation is suboptimal.

In the following paragraphs, we study some special cases,

**Full participation case** For the full participation case ( $\tau = n$ ), using definition from Theorem 1

$$\alpha_{\gamma,n} = \frac{1}{\gamma L_\gamma} > 1, \quad L_{\gamma,n} = L_\gamma, \quad C(\gamma, n, \alpha_{\gamma,n}) = L_\gamma (1 + \gamma L_{\max}) \leq L_{\max}. \quad (9)$$

In this case, we can compare our method with **FedExp** in the convex overparameterized setting.

**Remark 6.** Assume the conditions in Theorem 1 hold, the worst case iteration complexity of **FedExp** is given by  $\mathcal{O}\left(\frac{L_{\max}}{\epsilon}\right)$ , while for Algorithm 1, it is  $\mathcal{O}\left(\frac{C(\gamma, n, \alpha_{\gamma,n})}{\epsilon}\right)$ . As suggested by Lemma 7, Algorithm 1 has a better iteration complexity ( $C(\gamma, n, \alpha_{\gamma,n}) < L_{\max}$ ) whenever there exists  $L_i \neq L_{\max}$  for some  $i \in [n]$ , and the acceleration could reach up to a factor of  $n$  as suggested by Example 1. In general, the speed-up in the worst case is quantified by

$$\frac{L_{\max}}{1 + \gamma L_{\max}} \cdot \left( \frac{1}{n} \sum_{i=1}^n \frac{L_i}{1 + \gamma L_i} \right)^{-1} \leq \frac{L_{\max}}{C(\gamma, n, \alpha_{\gamma,n})} \leq n \cdot \frac{L_{\max}}{1 + \gamma L_{\max}} \cdot \left( \frac{1}{n} \sum_{i=1}^n \frac{L_i}{1 + \gamma L_i} \right)^{-1}.$$

247 **Single client case** For the single client case ( $\tau = 1$ ), using definition from Theorem 1

$$\alpha_{\gamma,1} = 1 + \frac{1}{\gamma L_{\max}} > 1, \quad L_{\gamma,1} = \frac{L_{\max}}{1 + \gamma L_{\max}}, \quad C(\gamma, 1, \alpha_{\gamma,1}) = L_{\max}.$$

248

249 **Remark 7.** Compared with full and partial client participation, the following relations hold for any  
250  $\tau \in [n]$ ,

$$C(\gamma, n, \alpha_{\gamma,n}) \leq C(\gamma, \tau, \alpha_{\gamma,\tau}) \leq C(\gamma, 1, \alpha_{\gamma,1}) \quad \text{and} \quad \alpha_{\gamma,1} \leq \alpha_{\gamma,\tau} \leq \alpha_{\gamma,n}, \quad \forall \tau \in [n].$$

251 Since the iteration complexity of **FedExProx** is given by  $\mathcal{O}\left(\frac{C(\gamma,\tau,\alpha_{\gamma,\tau})}{\epsilon}\right)$ , the above inequalities tell  
252 us a larger client minibatch size  $\tau$  leads to a larger extrapolation and a better iteration complexity.  
253 Specifically, Lemma 7 suggests the improvement over the single client case could be as much as a  
254 factor of  $n$  ( $C(\gamma, n, \alpha_{\gamma,n}) = \frac{1}{n} C(\gamma, 1, \alpha_{\gamma,1})$ ) as suggested by Example 1.

## 255 4 Adaptive extrapolation

256 Observe that in Theorem 1, in order to determine the optimal extrapolation, we require the knowledge  
257 of  $L_{\gamma,\tau}$ , which is typically unknown. Although theoretically it suggests that simply averaging  
258 the iterates may result in suboptimal performance, in practice, this implication is less significant.  
259 To address this issue, we introduced two variants of **FedExProx**, based on gradient diversity and  
260 stochastic Polyak step size, given their relation to the extrapolation parameter in our cases.

261 **Theorem 2.** Suppose Assumption 1 (Differentiability), Assumption 2 (Interpolation regime), Assump-  
262 tion 3 (Convexity) and Assumption 4 (Smoothness) hold.

263 (i) (**FedExProx-GrADS**): If we are using  $\alpha_k = \alpha_{k,G}$ , where

$$\alpha_{k,G} := \frac{\frac{1}{n} \sum_{i=1}^n \|x_k - \text{prox}_{\gamma f_i}(x_k)\|^2}{\left\| \frac{1}{n} \sum_{i=1}^n (x_k - \text{prox}_{\gamma f_i}(x_k)) \right\|^2} \geq 1, \quad (10)$$

264 then the iterates of Algorithm 1 with  $\tau = n$  satisfy

$$\mathbb{E}[f(\bar{x}_K)] - \inf f \leq \frac{1 + \gamma L_{\max}}{2 + \gamma L_{\max}} \cdot \left( \frac{1}{\gamma} + L_{\max} \right) \cdot \frac{\|x_0 - x_\star\|^2}{\sum_{k=0}^{K-1} \alpha_{k,G}},$$

265 where  $\bar{x}_K$  is chosen randomly from the first  $K$  iterates  $\{x_0, x_1, \dots, x_{K-1}\}$  with probabilities  
266  $p_k = \alpha_{k,G} / \sum_{k=0}^{K-1} \alpha_{k,G}$ .

267 (ii) (**FedExProx-StoPS**): If we are using  $\alpha_k = \alpha_{k,S}$ , where,

$$\alpha_{k,S} := \frac{\frac{1}{n} \sum_{i=1}^n \left( M_{f_i}^\gamma(x_k) - \inf M_{f_i}^\gamma \right)}{\gamma \left\| \frac{1}{n} \sum_{i=1}^n \nabla M_{f_i}^\gamma(x_k) \right\|^2} \geq \frac{1}{2\gamma L_\gamma}, \quad (11)$$

268 then the iterates of Algorithm 1 with  $\tau = n$  satisfy

$$\mathbb{E}[f(\bar{x}_K)] - \inf f \leq \left( \frac{1}{\gamma} + L_{\max} \right) \cdot \frac{\|x_0 - x_\star\|^2}{\sum_{k=0}^{K-1} \alpha_{k,S}}, \quad (12)$$

269 where  $\bar{x}_K$  is chosen randomly from the first  $K$  iterates  $\{x_0, x_1, \dots, x_{K-1}\}$  with probabilities  
270  $p_k = \alpha_{k,S} / \sum_{k=0}^{K-1} \alpha_{k,S}$ .

271 Theorem 2 describes the convergence in the full participation setting. However, we can also extend it  
272 to the stochastic setting by implementing a stochastic version of these adaptive step size rules for  
273 gradient-based methods [Horváth et al., 2022, Loizou et al., 2021]. See Theorem 5 in the Appendix  
274 for the details.

275 **Remark 8.** In fact, the adaptive rule based on gradient diversity can be improved by using  $\frac{L_{\max}}{1 + \gamma L_{\max}}$   
276 instead of  $\frac{1}{\gamma}$  as the maximum of local smoothness constant of Moreau envelopes, resulting in the  
277 extrapolation,

$$\alpha_k = \alpha'_{k,G} := \frac{1 + \gamma L_{\max}}{\gamma L_{\max}} \cdot \frac{\frac{1}{n} \sum_{i=1}^n \|x_k - \text{prox}_{\gamma f_i}(x_k)\|^2}{\left\| \frac{1}{n} \sum_{i=1}^n (x_k - \text{prox}_{\gamma f_i}(x_k)) \right\|^2}. \quad (13)$$



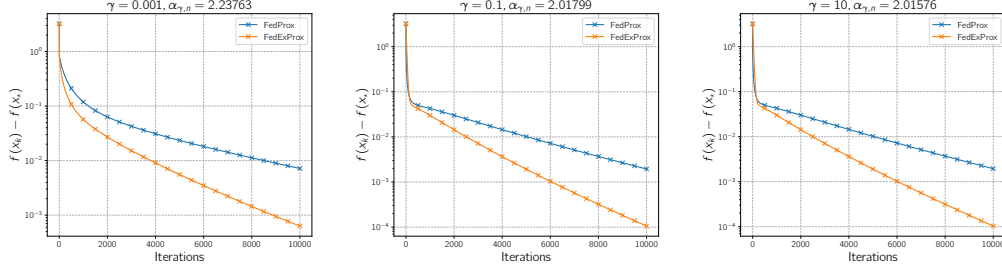

Figure 1: Comparison of FedExProx and FedProx in terms of iteration complexity in the full participation setting. The notation  $\gamma$  here denotes the local step size of the proximity operator and  $\alpha_{\gamma,n}$  is the corresponding optimal extrapolation parameter computed in (9) in the full participation case. In all cases, our proposed algorithm outperforms FedProx, suggesting that the practice of simply averaging the iterates is suboptimal.

One can obtain a slightly better convergence guarantee than the FedExProx-GraDS case in Theorem 2, see Corollary 2 in the Appendix. However, this requires the knowledge of  $L_{\max}$  in order to compute  $\frac{1+\gamma L_{\max}}{\gamma L_{\max}}$ .

**Remark 9.** Note that, compared to classical gradient-based methods, FedExProx-GraDS benefits from “semi-adaptivity”. This refers to the fact that the algorithm converges for any choice of  $\gamma > 0$ . Although a smaller  $\gamma$  hinders convergence, setting it to at least  $\frac{1}{L_{\max}}$  limits the worsening of the convergence to a factor of 2.

**Remark 10.** Compared to FedExProx with the optimal constant extrapolation parameter, we gain “semi-adaptivity” here by using the gradient diversity based extrapolation. However, this results in losing the favorable dependence of convergence on  $L_{\gamma}$  and instead establishes a dependence on  $L_{\max}$ .

**Remark 11.** For FedExProx-StoPS, as it is suggested by Lemma 20, the convergence depends on the favorable smoothness constant  $L_{\gamma}$ , rather than on  $L_{\max}$ . However, this comes at the price of having to know the minimum of each individual Moreau envelope.

For a detailed discussion of the adaptive variants of FedExProx, we refer the readers to Appendix F.5. Since one of our starting points is the RPM by Necoara et al. [2019] to solve the convex feasibility problem with non-smooth local objectives, we have also adapted our method to non-smooth cases, as detailed in Theorem 4 in the Appendix. We also provided a discussion of our method in the non-interpolated setting and in the non-convex setting in Appendix F. Finally, we support our findings with experiments, see Figure 1 for a simple experiment confirming that FedExProx indeed has a better iteration complexity than FedProx. For more details on the experiments, we refer the readers to Appendix I in the Appendix.

## 5 Conclusion

### 5.1 Limitations

Our analysis of FedExProx serves as an initial step in adding extrapolation to FedProx, which currently relies on the suboptimal practice of the server merely averaging the iterates. While we discuss the behavior of our algorithm in non-interpolated and non-convex scenarios, our analysis only validates the effectiveness of extrapolation under the interpolation regime assumption.

### 5.2 Future Work

As we have just mentioned, extending our method and analysis beyond interpolation and convex regime is intriguing. In this case, new techniques may be needed for variance reduction. It is also interesting to investigate whether extrapolation can be applied together with client-specific personalization.

## References

- D. Alistarh, D. Grubic, J. Li, R. Tomioka, and M. Vojnovic. QSGD: Communication-efficient SGD via gradient quantization and encoding. *Advances in Neural Information Processing Systems*, 30, 2017.
- S. Arora, S. Du, W. Hu, Z. Li, and R. Wang. Fine-grained analysis of optimization and generalization for overparameterized two-layer neural networks. In *International Conference on Machine Learning*, pages 322–332. PMLR, 2019.
- H. Asi and J. C. Duchi. Stochastic (approximate) proximal point methods: Convergence, optimality, and adaptivity. *SIAM Journal on Optimization*, 29(3):2257–2290, 2019.
- H. Asi, K. Chadha, G. Cheng, and J. C. Duchi. Minibatch stochastic approximate proximal point methods. *Advances in Neural Information Processing Systems*, 33:21958–21968, 2020.
- H. H. Bauschke, P. L. Combettes, and S. G. Kruk. Extrapolation algorithm for affine-convex feasibility problems. *Numerical Algorithms*, 41:239–274, 2006.
- A. Beck. *First-order methods in optimization*. SIAM, 2017.
- D. P. Bertsekas. Incremental proximal methods for large scale convex optimization. *Mathematical Programming*, 129(2):163–195, 2011.
- P. Bianchi. Ergodic convergence of a stochastic proximal point algorithm. *SIAM Journal on Optimization*, 26(4):2235–2260, 2016.
- A. Böhm and S. J. Wright. Variable smoothing for weakly convex composite functions. *Journal of Optimization Theory and Applications*, 188:628–649, 2021.
- S. Bubeck et al. Convex optimization: Algorithms and complexity. *Foundations and Trends® in Machine Learning*, 8(3-4):231–357, 2015.
- Y. Censor, T. Elfving, and G. Herman. Averaging strings of sequential iterations for convex feasibility problems. In *Studies in Computational Mathematics*, volume 8, pages 101–113. Elsevier, 2001.
- Y. Censor, W. Chen, P. L. Combettes, R. Davidi, and G. T. Herman. On the effectiveness of projection methods for convex feasibility problems with linear inequality constraints. *Computational Optimization and Applications*, 51:1065–1088, 2012.
- P. L. Combettes. Convex set theoretic image recovery by extrapolated iterations of parallel subgradient projections. *IEEE Transactions on Image Processing*, 6(4):493–506, 1997a.
- P. L. Combettes. Hilbertian convex feasibility problem: Convergence of projection methods. *Applied Mathematics and Optimization*, 35(3):311–330, 1997b.
- D. Davis and D. Drusvyatskiy. Stochastic model-based minimization of weakly convex functions. *SIAM Journal on Optimization*, 29(1):207–239, 2019.
- J. Duchi, E. Hazan, and Y. Singer. Adaptive subgradient methods for online learning and stochastic optimization. *Journal of Machine Learning Research*, 12(7), 2011.
- S. Ghadimi and G. Lan. Stochastic first-and zeroth-order methods for nonconvex stochastic programming. *SIAM Journal on Optimization*, 23(4):2341–2368, 2013.
- E. Gorbunov, F. Hanzely, and P. Richtárik. A unified theory of SGD: Variance reduction, sampling, quantization and coordinate descent. In *International Conference on Artificial Intelligence and Statistics*, pages 680–690. PMLR, 2020.
- R. M. Gower, N. Loizou, X. Qian, A. Sailanbayev, E. Shulgin, and P. Richtárik. SGD: General analysis and improved rates. In *International Conference on Machine Learning*, pages 5200–5209. PMLR, 2019.
- G. Hinton, N. Srivastava, and K. Swersky. Neural networks for machine learning lecture 6a overview of mini-batch gradient descent.

356 S. Horváth, K. Mishchenko, and P. Richtárik. Adaptive learning rates for faster stochastic gradient  
357 methods. *arXiv preprint arXiv:2208.05287*, 2022.

358 D. Jhunjhunwala, S. Wang, and G. Joshi. FedExP: Speeding up federated averaging via extrapolation.  
359 In *International Conference on Learning Representations*, 2023.

360 A. Jourani, L. Thibault, and D. Zagrodny. Differential properties of the moreau envelope. *Journal of*  
361 *Functional Analysis*, 266(3):1185–1237, 2014.

362 S. Kaczmarz. Approximate solution of systems of linear equations. *International Journal of Control*,  
363 57(6):1269–1271, 1937.

364 A. Khaled and C. Jin. Faster federated optimization under second-order similarity. In *The Eleventh*  
365 *International Conference on Learning Representations*, 2022.

366 A. Khaled and P. Richtárik. Better theory for SGD in the nonconvex world. *Transactions on Machine*  
367 *Learning Research*, 2023.

368 S. Khirirat, H. R. Feyzmahdavian, and M. Johansson. Distributed learning with compressed gradients.  
369 *arXiv preprint arXiv:1806.06573*, 2018.

370 D. Kingma and J. Ba. Adam: A method for stochastic optimization. In *International Conference on*  
371 *Learning Representations*, San Diego, CA, USA, 2015.

372 J. Konečný, H. B. McMahan, F. X. Yu, P. Richtárik, A. T. Suresh, and D. Bacon. Federated learning:  
373 Strategies for improving communication efficiency. *arXiv preprint arXiv:1610.05492*, 8, 2016.

374 H. Li, A. Karagulyan, and P. Richtárik. Det-CGD: Compressed gradient descent with matrix stepsizes  
375 for non-convex optimization. In *International Conference on Learning Representations*, 2024.

376 T. Li, A. K. Sahu, M. Zaheer, M. Sanjabi, A. Talwalkar, and V. Smith. Federated optimization in  
377 heterogeneous networks. *Proceedings of Machine Learning and Systems*, 2:429–450, 2020.

378 N. Loizou, S. Vaswani, I. H. Laradji, and S. Lacoste-Julien. Stochastic Polyak step-size for SGD: An  
379 adaptive learning rate for fast convergence. In *International Conference on Artificial Intelligence*  
380 *and Statistics*, pages 1306–1314. PMLR, 2021.

381 G. Malinovsky, K. Mishchenko, and P. Richtárik. Server-side stepsizes and sampling without  
382 replacement provably help in federated optimization. *arXiv preprint arXiv:2201.11066*, 2022.

383 O. L. Mangasarian and M. V. Solodov. Backpropagation convergence via deterministic nonmonotone  
384 perturbed minimization. *Advances in Neural Information Processing Systems*, 6, 1993.

385 B. McMahan, E. Moore, D. Ramage, S. Hampson, and B. A. y Arcas. Communication-efficient  
386 learning of deep networks from decentralized data. In *Artificial Intelligence and Statistics*, pages  
387 1273–1282. PMLR, 2017.

388 K. Mishchenko, S. Hanzely, and P. Richtárik. Convergence of first-order algorithms for meta-learning  
389 with Moreau envelopes. *arXiv preprint arXiv:2301.06806*, 2023.

390 A. Montanari and Y. Zhong. The interpolation phase transition in neural networks: Memorization  
391 and generalization under lazy training. *The Annals of Statistics*, 50(5):2816–2847, 2022.

392 J.-J. Moreau. Proximité et dualité dans un espace Hilbertien. *Bulletin de la Société Mathématique de*  
393 *France*, 93:273–299, 1965.

394 T. S. Motzkin and I. J. Schoenberg. The relaxation method for linear inequalities. *Canadian Journal*  
395 *of Mathematics*, 6:393–404, 1954.

396 E. Moulines and F. Bach. Non-asymptotic analysis of stochastic approximation algorithms for  
397 machine learning. *Advances in Neural Information Processing Systems*, 24, 2011.

398 I. Necoara, P. Richtárik, and A. Patrascu. Randomized projection methods for convex feasibility:  
399 Conditioning and convergence rates. *SIAM Journal on Optimization*, 29(4):2814–2852, 2019.

400 A. Nemirovski, A. Juditsky, G. Lan, and A. Shapiro. Robust stochastic approximation approach to  
401 stochastic programming. *SIAM Journal on Optimization*, 19(4):1574–1609, 2009.

402 A. Orvieto, S. Lacoste-Julien, and N. Loizou. Dynamics of SGD with stochastic Polyak stepsizes:  
403 Truly adaptive variants and convergence to exact solution. *Advances in Neural Information*  
404 *Processing Systems*, 35:26943–26954, 2022.

405 N. Parikh, S. Boyd, et al. Proximal algorithms. *Foundations and Trends® in Optimization*, 1(3):  
406 127–239, 2014.

407 A. Patrascu and I. Necoara. Nonasymptotic convergence of stochastic proximal point methods for  
408 constrained convex optimization. *Journal of Machine Learning Research*, 18(198):1–42, 2018.

409 G. Pierra. Decomposition through formalization in a product space. *Mathematical Programming*, 28:  
410 96–115, 1984.

411 C. Planiden and X. Wang. Strongly convex functions, Moreau envelopes, and the generic nature of  
412 convex functions with strong minimizers. *SIAM Journal on Optimization*, 26(2):1341–1364, 2016.

413 C. Planiden and X. Wang. Proximal mappings and Moreau envelopes of single-variable convex  
414 piecewise cubic functions and multivariable gauge functions. *Nonsmooth Optimization and Its*  
415 *Applications*, pages 89–130, 2019.

416 P. Richtárik and M. Takác. Stochastic reformulations of linear systems: algorithms and convergence  
417 theory. *SIAM Journal on Matrix Analysis and Applications*, 41(2):487–524, 2020.

418 H. Robbins and S. Monro. A stochastic approximation method. *The Annals of Mathematical Statistics*,  
419 pages 400–407, 1951.

420 R. T. Rockafellar. Monotone operators and the proximal point algorithm. *SIAM Journal on Control*  
421 *and Optimization*, 14(5):877–898, 1976.

422 E. K. Ryu and S. Boyd. Stochastic proximal iteration: a non-asymptotic improvement upon stochastic  
423 gradient descent. *Author website, early draft*, 2014.

424 A. Sadiev, G. Malinovsky, E. Gorbunov, I. Sokolov, A. Khaled, K. Burlachenko, and P. Richtárik.  
425 Federated optimization algorithms with random reshuffling and gradient compression. *arXiv*  
426 *preprint arXiv:2206.07021*, 2022.

427 M. Safaryan, F. Hanzely, and P. Richtárik. Smoothness matrices beat smoothness constants: Bet-  
428 ter communication compression techniques for distributed optimization. *Advances in Neural*  
429 *Information Processing Systems*, 34:25688–25702, 2021.

430 C. T. Dinh, N. Tran, and J. Nguyen. Personalized federated learning with Moreau envelopes. *Advances*  
431 *in Neural Information Processing Systems*, 33:21394–21405, 2020.

432 J. Von Neumann. On rings of operators. reduction theory. *Annals of Mathematics*, pages 401–485,  
433 1949.

434 D. Yin, A. Pananjady, M. Lam, D. Papailiopoulos, K. Ramchandran, and P. Bartlett. Gradient  
435 diversity: a key ingredient for scalable distributed learning. In *International Conference on*  
436 *Artificial Intelligence and Statistics*, pages 1998–2007. PMLR, 2018.

437 Y. Yu, X. Zheng, M. Marchetti-Bowick, and E. Xing. Minimizing nonconvex non-separable functions.  
438 In *Artificial Intelligence and Statistics*, pages 1107–1115. PMLR, 2015.

439 X. Yuan and P. Li. On convergence of FedProx: Local dissimilarity invariant bounds, non-smoothness  
440 and beyond. *Advances in Neural Information Processing Systems*, 35:10752–10765, 2022.

|     |                                                                                             |           |
|-----|---------------------------------------------------------------------------------------------|-----------|
| 441 | <b>Contents</b>                                                                             |           |
| 442 | <b>A Notations</b>                                                                          | <b>14</b> |
| 443 | <b>B Basic Facts</b>                                                                        | <b>14</b> |
| 444 | <b>C Properties of Moreau envelope</b>                                                      | <b>15</b> |
| 445 | <b>D Technical lemmas</b>                                                                   | <b>17</b> |
| 446 | <b>E Theory of SGD</b>                                                                      | <b>18</b> |
| 447 | <b>F Additional analysis on FedExProx</b>                                                   | <b>18</b> |
| 448 | F.1 FedExProx in the strongly convex case . . . . .                                         | 18        |
| 449 | F.2 FedExProx in the non-smooth case . . . . .                                              | 19        |
| 450 | F.3 Discussion on the non-interpolation case . . . . .                                      | 20        |
| 451 | F.4 Discussion on the non-convex case . . . . .                                             | 20        |
| 452 | F.5 Additional notes on adaptive variants . . . . .                                         | 22        |
| 453 | F.6 Extension of adaptive variants into client partial participation (PP) setting . . . . . | 23        |
| 454 | <b>G Missing proofs of theorems and corollaries</b>                                         | <b>25</b> |
| 455 | G.1 Proof of Theorem 1 . . . . .                                                            | 25        |
| 456 | G.2 Proof of Theorem 2 . . . . .                                                            | 26        |
| 457 | G.3 Proof of Theorem 3 . . . . .                                                            | 28        |
| 458 | G.4 Proof of Theorem 4 . . . . .                                                            | 30        |
| 459 | G.5 Proof of Theorem 5 . . . . .                                                            | 31        |
| 460 | G.6 Proof of Corollary 1 . . . . .                                                          | 34        |
| 461 | G.7 Proof of Corollary 2 . . . . .                                                          | 34        |
| 462 | <b>H Missing proofs of lemmas</b>                                                           | <b>35</b> |
| 463 | H.1 Proof of Lemma 1 . . . . .                                                              | 35        |
| 464 | H.2 Proof of Lemma 2 . . . . .                                                              | 36        |
| 465 | H.3 Proof of Lemma 3 . . . . .                                                              | 36        |
| 466 | H.4 Proof of Lemma 4 . . . . .                                                              | 36        |
| 467 | H.5 Proof of Lemma 5 . . . . .                                                              | 36        |
| 468 | H.6 Proof of Lemma 6 . . . . .                                                              | 36        |
| 469 | H.7 Proof of Lemma 7 . . . . .                                                              | 37        |
| 470 | H.8 Proof of Lemma 8 . . . . .                                                              | 38        |
| 471 | H.9 Proof of Lemma 9 . . . . .                                                              | 38        |
| 472 | H.10 Proof of Lemma 10 . . . . .                                                            | 38        |
| 473 | H.11 Proof of Lemma 11 . . . . .                                                            | 40        |
| 474 | H.12 Proof of Lemma 12 . . . . .                                                            | 40        |
| 475 | H.13 Proof of Lemma 13 . . . . .                                                            | 40        |

|     |                                                                        |           |
|-----|------------------------------------------------------------------------|-----------|
| 476 | H.14 Proof of Lemma 14 . . . . .                                       | 41        |
| 477 | H.15 Proof of Lemma 15 . . . . .                                       | 42        |
| 478 | H.16 Proof of Lemma 16 . . . . .                                       | 42        |
| 479 | H.17 Proof of Lemma 17 . . . . .                                       | 42        |
| 480 | H.18 Proof of Lemma 18 . . . . .                                       | 42        |
| 481 | H.19 Proof of Lemma 19 . . . . .                                       | 42        |
| 482 | H.20 Proof of Lemma 20 . . . . .                                       | 43        |
| 483 | <b>I Experiments</b>                                                   | <b>43</b> |
| 484 | I.1 Experiment settings . . . . .                                      | 43        |
| 485 | I.2 Large dimension regime . . . . .                                   | 44        |
| 486 | I.2.1 Comparison of FedExProx and FedProx . . . . .                    | 44        |
| 487 | I.2.2 Comparison of FedExProx with different local step size . . . . . | 46        |
| 488 | I.2.3 Comparison of FedExProx and its adaptive variants . . . . .      | 47        |

## 489 A Notations

490 Throughout the paper, we use the notation  $\|\cdot\|$  to denote the standard Euclidean norm defined  
491 on  $\mathbb{R}^d$  and  $\langle \cdot, \cdot \rangle$  to denote the standard Euclidean inner product. Given a differentiable function  
492  $f : \mathbb{R}^d \mapsto \mathbb{R}$ , its gradient is denoted as  $\nabla f(x)$ . For a convex function  $f : \mathbb{R}^d \mapsto \mathbb{R}$ , we use  $\partial f(x)$   
493 to denote its subdifferential at  $x$ . We use the notation  $D_f(x, y)$  to denote the Bregman divergence  
494 associated with a function  $f : \mathbb{R}^d \mapsto \mathbb{R}$  between  $x$  and  $y$ . The notation  $\inf f$  is used to denote the  
495 minimum of a function  $f : \mathbb{R}^d \mapsto \mathbb{R}$ . We use  $\text{prox}_{\gamma f}(x)$  to denote the proximity operator of function  
496  $f : \mathbb{R}^d \mapsto \mathbb{R}$  with  $\gamma > 0$  at  $x \in \mathbb{R}^d$ , and  $M_f^\gamma(x)$  to denote the corresponding Moreau Envelope. The  
497 notation  $\square$  is used for the infimal convolution of two proper functions. We denote the average of the  
498 Moreau envelope of each local objective  $f_i$  by the notation  $M^\gamma : \mathbb{R}^d \mapsto \mathbb{R}$ . Specifically, we define  
499  $M^\gamma(x) = \frac{1}{n} \sum_{i=1}^n M_{f_i}^\gamma(x)$ . Note that  $M^\gamma(x)$  has an implicit dependence on  $\gamma$ , its smoothness  
500 constant is denoted by  $L_\gamma$ . We say an extended real-valued function  $f : \mathbb{R}^d \mapsto \mathbb{R} \cup \{+\infty\}$  is  
501 proper if there exists  $x \in \mathbb{R}^d$  such that  $f(x) < +\infty$ . We say an extended real-valued function  
502  $f : \mathbb{R}^d \mapsto \mathbb{R} \cup \{+\infty\}$  is closed if its epigraph is a closed set. The following Table 3 summarizes the  
503 commonly used notations and quantities appeared in this paper.

## 504 B Basic Facts

505 **Fact 1** (First prox theorem). [Beck, 2017, Theorem 6.3] Let  $f : \mathbb{R}^d \mapsto \mathbb{R}$  be a proper, closed and  
506 convex function. Then  $\text{prox}_f(x)$  is a singleton for any  $x \in \mathbb{R}^d$ .

507 **Fact 2** (Second prox theorem). [Beck, 2017, Theorem 6.39] Let  $f : \mathbb{R}^d \mapsto \mathbb{R} \cup \{+\infty\}$  be a proper,  
508 closed and convex function. Then for any  $x, u \in \mathbb{R}^d$ , the following three claims are equivalent:

- 509 (i)  $u = \text{prox}_f(x)$ .
- 510 (ii)  $x - u \in \partial f(u)$ .
- 511 (iii)  $\langle x - u, y - u \rangle \leq f(y) - f(u)$  for any  $y \in \mathbb{R}^d$ .

512 **Fact 3** (Bregman divergence). The Bregman divergence associated with a function  $f$  between  
513  $x, y \in \mathbb{R}^d$  is defined as,

$$D_f(x, y) := f(x) - f(y) - \langle \nabla f(y), x - y \rangle. \quad (14)$$

514 If  $f$  is convex, then for any  $x, y \in \mathbb{R}^d$

$$D_f(x, y) \geq 0. \quad (15)$$



Table 3: Summary of frequently used notations and quantities in this paper.

| Notations                      | Explanation                                                                                                   |
|--------------------------------|---------------------------------------------------------------------------------------------------------------|
| $n$                            | The total number of clients.                                                                                  |
| $d$                            | The dimension of the model.                                                                                   |
| $x$                            | The model which belongs to $\mathbb{R}^d$ .                                                                   |
| $K$                            | The total number of iterations.                                                                               |
| $x_k$                          | The model at $k$ -th iteration.                                                                               |
| $\alpha_k$                     | The extrapolation parameter at iteration $k$ .                                                                |
| $f_i(x)$                       | Each local objective function.                                                                                |
| $\gamma$                       | The step size in the proximity operator.                                                                      |
| $f(x)$                         | The global objective $f$ .                                                                                    |
| $\text{prox}_{\gamma f_i}(x)$  | The proximity operator associated with $f_i$ and $\gamma > 0$ at point $x \in \mathbb{R}^d$ .                 |
| $M_{f_i}^\gamma(x)$            | The Moreau envelope associated with $f_i$ and $\gamma > 0$ at point $x \in \mathbb{R}^d$ .                    |
| $M^\gamma(x)$                  | The average of $M_{f_i}^\gamma(x)$ .                                                                          |
| $L_i$                          | The smoothness constant of $f_i$ .                                                                            |
| $L$                            | The smoothness constant of $f$ .                                                                              |
| $\mu$                          | The strong convexity constant of $f$ .                                                                        |
| $L_i/(1+\gamma L_i)$           | The smoothness constant of $M_{f_i}^\gamma$ .                                                                 |
| $L_{\max}$                     | The maximum of all $L_i$ , for $i \in [n]$ .                                                                  |
| $L_{\max}/(1+\gamma L_{\max})$ | The maximum of the smoothness constant of each $M_{f_i}^\gamma$ for $i \in [n]$ .                             |
| $L_\gamma$                     | The smoothness constant of $M^\gamma$ .                                                                       |
| $L_{\gamma,\tau}$              | The interpolation between the $L_\gamma$ and $L_{\max}/(1+\gamma L_{\max})$ induced by $\tau$ -nice sampling. |
| $\alpha_{\gamma,\tau}$         | The optimal extrapolation parameter of <b>FedExProx</b> under $\tau$ -nice sampling.                          |
| $C(\gamma, \tau, \alpha)$      | The convergence rate of <b>FedExProx</b> with $\tau$ -nice sampling in the convex case.                       |
| $\alpha_{k,G}$                 | The gradient diversity extrapolation in the $k$ -th iteration defined in Theorem 2.                           |
| $\alpha_{k,S}$                 | The stochastic Polyak extrapolation in the $k$ -th iteration defined in Theorem 2.                            |
| $\alpha'_{k,G}$                | The improved gradient diversity based extrapolation used in Corollary 2.                                      |
| $D_f(x, y)$                    | The Bregman divergence associated with $f$ between two points $x, y \in \mathbb{R}^d$ .                       |
| $S_k$                          | The set of indices server sampled in the $k$ -th iteration.                                                   |
| $\alpha_{\tau,k,G}$            | The gradient diversity based extrapolation in the $k$ -th iteration for <b>FedExProx-GraDS-PP</b> .           |
| $\alpha_{\tau,k,S}$            | The stochastic Polyak based extrapolation in the $k$ -th iteration for <b>FedExProx-StoPS-PP</b> .            |

515 If  $f$  is convex,  $L$ -smooth and differentiable, the following inequalities hold for any  $x, y \in \mathbb{R}^d$ ,

$$\begin{aligned} \frac{1}{L} \|\nabla f(x) - \nabla f(y)\|^2 &\leq D_f(x, y) + D_f(y, x) \leq L \|x - y\|^2, \\ \frac{1}{L} \|\nabla f(x) - \nabla f(y)\|^2 &\leq 2D_f(x, y) \leq L \|x - y\|^2. \end{aligned} \quad (16)$$

516 **Fact 4** (Increasing function). Let  $f(x) = \frac{x}{1+\gamma x}$ , where  $\gamma > 0$ . Then  $f(x)$  is monotone increasing  
517 when  $x > 0$ .

## 518 C Properties of Moreau envelope

519 In this section, we explore the properties of the Moreau envelope of individual functions  $f_i$ , and the  
520 global objective  $M^\gamma = \frac{1}{n} \sum_{i=1}^n M_{f_i}^\gamma$ . Before that, we present the definition of infimal convolution

521 **Definition 3** (Infimal convolution). The infimal convolution of two proper functions  $f, g : \mathbb{R}^d \mapsto$   
522  $\mathbb{R} \cup \{+\infty\}$  is defined via the following formula

$$(f \square g)(x) = \min_{z \in \mathbb{R}^d} \{f(z) + g(x - z)\}.$$

523 One key observation is that  $M_f^\gamma$  can be viewed as the infimal convolution of the proper, closed and  
524 convex function  $f$  and the real-valued convex function  $\frac{1}{2\gamma} \|\cdot\|^2$ . This observation enables us to infer  
525 the convexity and smoothness of the Moreau envelope from the properties of the original function.

526 First, we present two lemmas about basic properties of Moreau envelope.

527 **Lemma 1** (Real-valuedness). *Let  $f : \mathbb{R}^d \mapsto \mathbb{R} \cup \{+\infty\}$  be a proper, closed and convex function.*  
 528 *Then its Moreau envelope  $M_f^\gamma$  for any  $\gamma > 0$  is a real-valued function. In particular, the following*  
 529 *identity holds for  $x \in \mathbb{R}^d$  according to the definition of Moreau envelope,*

$$M_f^\gamma(x) = f(\text{prox}_{\gamma f}(x)) + \frac{1}{2\gamma} \|x - \text{prox}_{\gamma f}(x)\|^2.$$

530 **Lemma 2** (Differentiability of Moreau envelope). *[Beck, 2017, Theorem 6.60] Let  $f : \mathbb{R}^d \mapsto$*   
 531  *$\mathbb{R} \cup \{+\infty\}$  be a proper, closed and convex function. Then its Moreau envelope  $M_f^\gamma$  for any  $\gamma > 0$  is*  
 532  *$\frac{1}{\gamma}$ -smooth, and for any  $x \in \mathbb{R}^d$ , we have*

$$\nabla M_f^\gamma(x) = \frac{1}{\gamma} (x - \text{prox}_{\gamma f}(x)).$$

533 We then focus on the relation between individual  $f_i$  and  $M_{f_i}^\gamma$ . The following lemma suggests that the  
 534 convexity of individual  $f_i$  guarantees the convexity of  $M_{f_i}^\gamma$ .

535 **Lemma 3** (Convexity of Moreau envelope). *[Beck, 2017, Theorem 6.55] Let  $f : \mathbb{R}^d \mapsto \mathbb{R} \cup \{+\infty\}$*   
 536 *be a proper and convex function. Then  $M_f^\gamma$  is a convex function.*

537 It is also true that the smoothness of individual  $f_i$  indicates the smoothness of  $M_{f_i}^\gamma$ .

538 **Lemma 4** (Smoothness of Moreau envelope). *Let  $f : \mathbb{R}^d \mapsto \mathbb{R}$  be a convex and  $L$ -smooth function.*  
 539 *Then  $M_f^\gamma$  is  $\frac{L}{1+\gamma L}$ -smooth.*

540 One notable fact is that  $f_i$  and  $M_{f_i}^\gamma$  have the same set of minimizers.

541 **Lemma 5** (Minimizer equivalence). *Let  $f : \mathbb{R}^d \mapsto \mathbb{R} \cup \{+\infty\}$  be a proper, closed and convex*  
 542 *function. Then for any  $\gamma > 0$ ,  $f$  and  $M_f^\gamma$  has the same set of minimizers.*

543 In addition,  $M_f^\gamma$  is a global lower bound of  $f$ .

544 **Lemma 6** (Individual lower bound). *Let  $f : \mathbb{R}^d \mapsto \mathbb{R} \cup \{+\infty\}$  be a proper, closed and convex*  
 545 *function. Then the Moreau envelope  $M_f^\gamma$  satisfies  $M_f^\gamma(x) \leq f(x)$  for all  $x \in \mathbb{R}^d$ .*

546 Next, we focus on the global objective  $M^\gamma(x)$ . The following lemma bounds its smoothness constant  
 547 from both above and below.

548 **Lemma 7** (Global convexity and smoothness). *Let each  $f_i$  be proper, closed convex and  $L_i$ -smooth.*  
 549 *Then  $M$  is convex and  $L_\gamma$ -smooth with*

$$\frac{1}{n^2} \sum_{i=1}^n \frac{L_i}{1 + \gamma L_i} \leq L_\gamma \leq \frac{1}{n} \sum_{i=1}^n \frac{L_i}{1 + \gamma L_i}.$$

550 *As a result of the above inequalities, we have the following inequality on the condition number defined*  
 551 *in Theorem 1 which holds for any  $\tau \in [n]$ ,*

$$L_\gamma (1 + \gamma L_{\max}) = C(\gamma, n, \alpha_{\gamma, n}) \leq C(\gamma, \tau, \alpha_{\gamma, \tau}) \leq C(\gamma, 1, \alpha_{\gamma, 1}) = L_{\max}.$$

552 *When there exists at least one  $L_i < L_{\max}$ , we have  $C(\gamma, n, \alpha_{\gamma, n}) < C(\gamma, \tau, \alpha_{\gamma, \tau}) < L_{\max} =$*   
 553  *$C(\gamma, 1, \alpha_{\gamma, 1})$ . Even  $L_i = L_{\max}$  holds for all  $i \in [n]$ , there are cases (See Example 1 in the proof.)*  
 554 *that  $C(\gamma, n, \alpha_{\gamma, n}) = \frac{1}{n} C(\gamma, 1, \alpha_{\gamma, 1}) = \frac{1}{n} L_{\max}$ .*

555 A key observation in this case is the generalization of Lemma 5 into the finite-sum setting under the  
 556 interpolation regime.

557 **Lemma 8** (Minimizer equivalence). *If we let every  $f_i : \mathbb{R}^d \mapsto \mathbb{R} \cup \{+\infty\}$  be proper, closed and*  
 558 *convex, then  $f(x) = \frac{1}{n} \sum_{i=1}^n f_i(x)$  has the same set of minimizers and minimum as*

$$M^\gamma(x) = \frac{1}{n} \sum_{i=1}^n M_{f_i}^\gamma(x),$$

559 *if we are in the interpolation regime and  $0 < \gamma < \infty$ .*

560 The following lemma generalizes Lemma 6 into the finite-sum setting.

561 **Lemma 9** (Global lower bound). *Let each  $f_i : \mathbb{R}^d \mapsto \mathbb{R} \cup \{+\infty\}$  be proper, closed and convex. Then*  
 562 *the following inequality holds for any  $x \in \mathbb{R}^d$  and  $\gamma > 0$ ,*

$$M^\gamma(x) \leq M_f^\gamma(x) \leq f(x).$$

563 *In addition, if we assume we are in the interpolation regime, then  $M^\gamma$ ,  $M_f^\gamma$  and  $f$  have the same set*  
 564 *of minimizers, for any  $x_\star$  in this set of minimizers, the following identity holds,*

$$M^\gamma(x_\star) = M_f^\gamma(x_\star) = f(x_\star).$$

565 Besides the global lower bound provided above, there is also a relation between the function value  
 566 suboptimality of  $M^\gamma$  and  $f$ .

567 **Lemma 10** (Suboptimality bound). *Suppose Assumption 1 (Differentiability), 2 (Interpolation*  
 568 *Regime), 3 (Convexity) and 4 (Smoothness) hold, for any minimizer  $x_\star$  of  $M^\gamma(x)$ , all  $x \in \mathbb{R}^d$ , the*  
 569 *following inequality holds for each client objective,*

$$M_{f_i}^\gamma(x) - M_{f_i}^\gamma(x_\star) \geq \frac{1}{1 + \gamma L_i} (f_i(x) - f_i(x_\star)). \quad (17)$$

570 Furthermore, this suggests

$$M^\gamma(x) - M^\gamma(x_\star) \geq \frac{1}{1 + \gamma L_{\max}} (f(x) - f(x_\star)). \quad (18)$$

571 A direct consequence of the above function suboptimality bound is the star strong convexity of  $M^\gamma$   
 572 from the strong convexity of  $f$ .

573 **Lemma 11.** (Star strong convexity) *Assume Assumption 1 (Differentiability), Assumption 2 (Interpo-*  
 574 *lation Regime), Assumption 3 (Convexity), Assumption 4 (Smoothness) and Assumption 5 (Strong*  
 575 *convexity) hold, then the convex function  $M^\gamma(x)$  satisfies the following inequality,*

$$M^\gamma(x) - M^\gamma(x_\star) \geq \frac{\mu}{1 + \gamma L_{\max}} \cdot \frac{1}{2} \|x - x_\star\|^2,$$

576 for any  $x \in \mathbb{R}^d$  and a minimizer  $x_\star$  of  $M^\gamma(x)$ .

577 The star strong convexity property of  $M^\gamma$  allows us to improve the sublinear convergence in the  
 578 convex regime into linear convergence.

## 579 D Technical lemmas

580 **Lemma 12.** *Let  $f : \mathbb{R}^d \mapsto \mathbb{R}$  be a proper, closed and convex function. Then  $x$  is a minimizer of  $f$  if*  
 581 *and only if  $x = \text{prox}_{\gamma f}(x)$ .*

582 **Lemma 13.** *Assume we are working with the finite-sum problem  $f = \frac{1}{n} \sum_{i=1}^n f_i$ , where each  $f_i$  is*  
 583 *convex and  $L_i$ -smooth,  $f$  is convex and  $L$ -smooth. Then the smoothness of  $L$  satisfies*

$$\frac{1}{n^2} \sum_{i=1}^n L_i \leq L \leq \frac{1}{n} \sum_{i=1}^n L_i,$$

584 where both bounds are attainable.

585 **Lemma 14.** *Assume that all the conditions mentioned in Theorem 1 hold, then the condition number*  
 586  *$C(\gamma, \tau, 1)$  of FedProx and the condition number  $C(\gamma, \tau, \alpha_{\gamma, \tau})$  of the optimal constant extrapolation*  
 587 *parameter  $\alpha_\star = \frac{1}{\gamma L_{\gamma, \tau}}$  satisfy the following inequality,*

$$\frac{C(\gamma, \tau, 1)}{C(\gamma, \tau, \alpha_{\gamma, \tau})} \geq 2 + \frac{1}{\gamma L_{\max}} + \gamma L_{\max} \geq 4 \quad \forall \tau \in [n].$$

588 **Lemma 15.** *Assume that all the conditions mentioned in Theorem 1 hold, then the following*  
 589 *inequalities hold,*

$$C(\gamma, n, \alpha_{\gamma, n}) \leq C(\gamma, \tau, \alpha_{\gamma, \tau}) \leq C(\gamma, 1, \alpha_{\gamma, 1}), \quad \forall \tau \in [n],$$

590 and

$$\alpha_{\gamma, 1} \geq \alpha_{\gamma, \tau} \geq \alpha_{\gamma, n}, \quad \forall \tau \in [n].$$

## E Theory of SGD

In order to prove our main theorem, we partly rely on the theory of SGD. The following theorem on the convergence of SGD with  $\tau$ -nice sampling is adapted from Gower et al. [2019]. We introduce modifications to the proof technique and tailor the theorem specifically to the interpolation regime. In this context, the upper bound on the step size is increased by a factor of 2. We first formulate the algorithm as follows for completeness.

---

### Algorithm 2 SGD with $\tau$ -nice sampling

---

- 1: **Parameters:** learning rate  $\eta > 0$ , starting point  $x_0 \in \mathbb{R}^d$ , minibatch size  $\tau \in \{1, 2, \dots, n\}$
- 2: **for**  $k = 0, 1, 2, \dots$  **do**
- 3:   The server samples  $S_k \subseteq \{1, 2, \dots, n\}$  uniformly from all subsets of cardinality  $\tau$
- 4:   The server performs one gradient step

$$x_{k+1} = x_k - \eta \cdot \frac{1}{\tau} \sum_{\xi_i \in S_k} \nabla f_{\xi_i}(x_k).$$

5: **end for**

---

**Theorem 3.** Assume Assumption 1 (Differentiability), 2 (Interpolation regime), 3 (Convexity), 4 (Smoothness) hold. Additionally, assume  $f$  is  $L$ -smooth where  $L \leq \frac{1}{n} \sum_{i=1}^n L_i$ .<sup>3</sup> If we are running SGD with  $\tau$ -nice sampling using step size  $\eta$  that satisfies  $0 < \eta < \frac{2}{A_\tau}$ , where

$$A_\tau := \frac{n - \tau}{\tau(n - 1)} L_{\max} + \frac{n(\tau - 1)}{\tau(n - 1)} L, \quad \text{and} \quad L_{\max} := \max_i L_i,$$

then the iterates of Algorithm 2 satisfy

$$\mathbb{E}[f(\bar{x}_K)] - \inf f \leq \frac{1}{\eta(2 - \eta A_\tau)} \cdot \frac{\|x_0 - x_\star\|^2}{K},$$

where  $K$  is the total number of iterations,  $\bar{x}_K$  is chosen uniformly at random from the first  $K$  iterates  $\{x_0, x_1, \dots, x_{K-1}\}$ . If, additionally, we assume the following property (which we will refer to as “star strong convexity”) holds, then the iterates of Algorithm 2 satisfy

$$\mathbb{E}[\|x_K - x_\star\|^2] \leq \left(1 - \eta(2 - \eta A_\tau) \cdot \frac{\mu}{2}\right)^K \|x_0 - x_\star\|^2.$$

## F Additional analysis on FedExProx

In this section, we provide some additional details on the analysis of FedExProx and its adaptive variants.

### F.1 FedExProx in the strongly convex case

The following corollary summarizes the convergence guarantee in the strongly convex case.

**Corollary 1.** Suppose the assumptions in Theorem 1 hold, and assume in addition that Assumption 5 (Strong Convexity) holds, then we achieve linear convergence for the final iterate of Algorithm 1, which satisfies

$$\mathbb{E}[\|x_K - x_\star\|^2] \leq \left(1 - \alpha\gamma(2 - \alpha\gamma L_{\gamma,\tau}) \cdot \frac{\mu}{2}\right)^K \|x_0 - x_\star\|^2,$$

where the definition of  $L_{\gamma,\tau}$  is given in Theorem 1. Fixing the choice of  $\gamma$  and  $\tau$ , the optimal extrapolation parameter that minimizes the convergence rate is given by  $\alpha_{\gamma,\tau} = \frac{1}{\gamma L_{\gamma,\tau}} > 1$ , which results in the following convergence in the strongly convex case:

$$\mathbb{E}[\|x_K - x_\star\|^2] \leq \left(1 - \frac{\mu}{2L_{\gamma,\tau}}\right)^K \|x_0 - x_\star\|^2.$$

As one can observe, by additionally assuming  $\mu$  strong convexity of the original function  $f$ , we improve the sublinear convergence in the convex case into linear convergence.

---

<sup>3</sup>This is justified by Lemma 13.

## 617 F.2 FedExProx in the non-smooth case

618 Our analysis also adapts to the non-smooth cases. This is based on the observation that even if we only  
 619 assume Assumption 1 (differentiability), Assumption 2 (Interpolation Regime) and Assumption 3  
 620 (Convexity) hold and do not have additional assumptions on smoothness, still each  $M_{f_i}^\gamma$  is  $\frac{1}{\gamma}$ -smooth  
 621 because of Lemma 2. Thus, the theory of SGD in the convex smooth case still applies. However, there  
 622 are some differences from the smooth case. For the sake of simplicity, we will mainly focus on the  
 623 convex non-smooth case with a constant extrapolation parameter, the results in the strongly convex  
 624 regime and with adaptive extrapolation can be obtained similarly as in the proof of Theorem 1 and  
 625 Theorem 2.

626 **Theorem 4.** Assume Assumption 1 (Differentiability), 2 (Interpolation Regime) and 3 (Convexity)  
 627 hold. If we choose a constant extrapolation parameter  $\alpha_k = \alpha$  satisfying

$$0 < \alpha < \frac{2}{\gamma L_{\gamma, \tau}},$$

628 where  $L_\gamma$  is the smoothness constant of  $M^\gamma(x) = \frac{1}{n} \sum_{i=1}^n M_{f_i}^\gamma(x)$ ,  $L_{\gamma, \tau}$  is given by

$$L_{\gamma, \tau} = \frac{n - \tau}{\tau(n - 1)} \cdot \frac{1}{\gamma} + \frac{n(\tau - 1)}{\tau(n - 1)} \cdot L_\gamma.$$

629 Then the iterates of Algorithm 1 satisfy

$$\gamma M^\gamma(\bar{x}_K) - \inf \gamma M^\gamma \leq \frac{1}{\alpha(2 - \alpha\gamma L_{\gamma, \tau})} \cdot \frac{\|x_0 - x_\star\|^2}{K},$$

630 where  $\bar{x}_K$  is chosen uniformly from the first  $K$  iterates  $\{x_0, x_1, \dots, x_{K-1}\}$ . It is easy to see that the  
 631 best  $\alpha$  is given by

$$\alpha_\star = \frac{1}{\gamma L_{\gamma, \tau}} \geq 1,$$

632 where the corresponding convergence is given by

$$\gamma M^\gamma(\bar{x}_K) - \inf \gamma M^\gamma \leq \left( \frac{n - \tau}{\tau(n - 1)} + \frac{n(\tau - 1)}{\tau(n - 1)} \gamma L_\gamma \right) \cdot \frac{\|x_0 - x_\star\|^2}{K}.$$

633 **Remark 12.** Notice that in this case we recover the convergence result of RPM presented in Necoara  
 634 et al. [2019] in the convex case. Indeed, if each  $f_i(x) = \mathbb{I}_{\mathcal{X}_i}(x)$ , then we have

$$\text{prox}_{\gamma f_i}(x) = \Pi_{\mathcal{X}_i}(x), \forall x \in \mathbb{R}^d,$$

635 and

$$\gamma M_{f_i}^\gamma(x) = \frac{1}{2} \|x - \Pi_{\mathcal{X}_i}(x)\|^2, \quad \text{and} \quad \gamma M^\gamma(x) = \frac{1}{2} \cdot \frac{1}{n} \sum_{i=1}^n \|x - \Pi_{\mathcal{X}_i}(x)\|^2.$$

636 Since we are in the interpolation regime,  $\inf \gamma M^\gamma = 0$ , and the convergence result becomes

$$\frac{1}{2} \cdot \frac{1}{n} \sum_{i=1}^n \|x_K - \Pi_{\mathcal{X}_i}(x_K)\|^2 \leq \left( \frac{n - \tau}{\tau(n - 1)} + \frac{n(\tau - 1)}{\tau(n - 1)} \gamma L_\gamma \right) \cdot \frac{\|x_0 - x_\star\|^2}{K}.$$

637 Notice that here  $\gamma L_\gamma \leq 1$  is the smoothness constant associated with each distance function  
 638  $\frac{1}{2} \|x - \Pi_{\mathcal{X}_i}(x)\|^2$ . The difference in the coefficients on the left-hand side from the original results  
 639 presented in Necoara et al. [2019] results from different sampling strategies employed.

640 A key difference in the non-smooth setting is that extrapolation in some cases may not be beneficiary,  
 641 as illustrated by the following remark.

642 **Remark 13.** In the non-smooth case, it is possible that  $\gamma L_\gamma = 1$ , where the optimal  $\alpha_\star = 1$ , in  
 643 this case, extrapolation will not generate any benefits. However, as it is mentioned by Necoara et al.  
 644 [2019], there are many examples where  $\gamma L_\gamma < 1$  and extrapolation indeed accelerates the algorithm.  
 645 This is different from the smooth case, where extrapolation always helps.

646 **Remark 14.** Since we do not assume smoothness, Lemma 10 no longer applies. Therefore, the  
 647 convergence result is stated in terms of the function value suboptimality of Moreau envelope instead  
 648 of the original objective  $f$  which is used in the smooth case.

Using a similar approach, it is also possible to obtain a convergence guarantee for [FedExProx](#) in the strongly convex non-smooth regime, assuming in addition that  $M^\gamma(x)$  is  $\mu_\gamma$ -strongly convex, where we recover the convergence result of [RPM](#) in [Necoara et al. \[2019\]](#) in cases where the smooth and linear regularity conditions are both satisfied. The following Table 4 confirms that our analysis of [FedExProx](#) recovers the theory of [RPM](#) as a special case.

Table 4: Comparison of iteration complexity of [RPM](#) from [Necoara et al. \[2019\]](#) obtained using our theory and the original theory. In both cases, the optimal extrapolation parameter is used. The notation  $\mathcal{O}(\cdot)$  is hidden.  $\varepsilon$  is the error level reached by function value suboptimality for convex case, squared distance to the solution for strongly convex case.

| Setting                                      | Original Theory                                                                                        | Our Theory                                                                                             |
|----------------------------------------------|--------------------------------------------------------------------------------------------------------|--------------------------------------------------------------------------------------------------------|
| Convex + smooth case <sup>(1)</sup>          | $\gamma L_{\gamma,\tau} \cdot \frac{\ x_0 - x_\star\ ^2}{\varepsilon}$                                 | $\gamma L_{\gamma,\tau} \cdot \frac{\ x_0 - x_\star\ ^2}{\varepsilon}$                                 |
| Strongly convex + smooth case <sup>(2)</sup> | $\frac{L_{\gamma,\tau}}{\mu_\gamma} \cdot \log \left( \frac{\ x_0 - x_\star\ ^2}{\varepsilon} \right)$ | $\frac{L_{\gamma,\tau}}{\mu_\gamma} \cdot \log \left( \frac{\ x_0 - x_\star\ ^2}{\varepsilon} \right)$ |

<sup>(1)</sup> The smoothness here does not refer to each  $f_i$  being  $L_i$ -smooth, but  $\gamma M^\gamma$  being  $\gamma L_\gamma$ -smooth. This corresponds to the smooth regularity condition presented in [Necoara et al. \[2019\]](#).

<sup>(2)</sup> Here the strongly convex setting meaning that the linear regularity condition in [Necoara et al. \[2019\]](#) is satisfied. In our theory, it refers to  $M^\gamma(x)$  being  $\mu_\gamma$ -strongly convex with  $\mu_\gamma < L_\gamma$ .

653

### 654 F.3 Discussion on the non-interpolation case

655 For the non-interpolation regime cases, we assume that Assumption 1 (Differentiability), Assump-  
656 tion 3 (Convexity) and Assumption 4 (Smoothness) hold. The differences are listed as follows

- 657 (i) Although  $f_i$  and  $M_{f_i}^\gamma$  have the same set of minimizers,  $f$  and  $M^\gamma$  does not necessarily  
658 have the same set of minimizers. This will lead to the convergence of [FedExProx](#) to the  
659 minimizer  $x_{\star,\gamma}'$  of  $M^\gamma(x)$  instead of  $x_\star$  of  $f$ . As a result, we will only converge to a  
660 neighborhood of the  $x_\star$  depending on the specific setting.
- 661 (ii) Since we are not in the interpolation regime, the upper bound on the step size of [SGD](#) with  
662 sampling is reduced by a factor of 2. Thus, the optimal extrapolation parameter  $\alpha'_\star$  in the  
663 non-interpolated cases is also halved,  $\alpha'_\star = \frac{1}{2}\alpha_\star$ . As a result, it is possible that  $\alpha'_\star \leq 1$ . The  
664 same phenomenon is also observed in [FedExP](#) of [Jhunjunwala et al. \[2023\]](#), where their  
665 heuristic in determining the extrapolation parameter adaptively is also reduced by a factor of  
666 2 in non overparameterized cases.

667 Observe that all of the above results in both smooth/non-smooth, interpolated/non-interpolated cases  
668 suggests that the practice of server simply averaging the iterates it obtained from local training is  
669 suboptimal.

### 670 F.4 Discussion on the non-convex case

671 In the non-convex case, we assume Assumption 1 (Differentiability) holds, and we need the following  
672 additional assumptions on  $f : \mathbb{R}^d \mapsto \mathbb{R}$  and  $f_i : \mathbb{R}^d \mapsto \mathbb{R}$ :

673 **Assumption 6** (Lower boundedness). *Function  $f_i$  is lower bounded by  $\inf f_i$ .*

674 **Assumption 7** (Weak convexity). *Function  $f_i$  is  $\rho > 0$  weakly convex, this means that  $f_i + \frac{\rho}{2} \|\cdot\|^2$  is  
675 convex.*

676 We have the following lemma under the above assumptions:

677 **Lemma 16.** [[Böhm and Wright, 2021, Lemma 3.1](#)] *Let  $f$  be a proper, closed,  $\rho$ -weakly convex  
678 function and let  $\gamma < \frac{1}{\rho}$ . Then the Moreau envelope  $M_f^\gamma$  is continuously differentiable on  $\mathbb{R}^d$  with*

$$\nabla M_f^\gamma(x) = \frac{1}{\gamma} (x - \text{prox}_{\gamma f}(x)).$$

679 *In addition, the Moreau envelope is  $\max \left\{ \frac{1}{\gamma}, \frac{\rho}{1-\gamma\rho} \right\}$ -smooth. We will thereby denote the smoothness  
680 constant as  $L_{\gamma,\rho}$ .*



Indeed, if the stepsize  $\gamma$  in this case is chosen properly such that  $\frac{1}{\gamma} > \rho$ , then it is straight forward to see the function within the proximity operator  $\text{prox}_{\gamma f_i}$  given by  $f_i + \frac{1}{2} \cdot \frac{1}{\gamma} \|\cdot\|^2$  is strongly convex. Thus the proximity operator still results in a singleton. Lemma 16 allows us to again reformulate the original algorithm using the gradient of Moreau envelope. The only difference from the convex regime is that the Moreau envelope  $M_{f_i}^\gamma$  is not necessarily convex. The following lemmas illustrate the connection between  $M_{f_i}^\gamma$  and  $f_i$ :

**Lemma 17.** [Yu et al., 2015, Proposition 7] Let  $\gamma > 0$ ,  $f$  be a closed, proper function that is lower bounded. Then  $M_f^\gamma \leq f$ ,  $\inf M_f^\gamma = \inf f$ ,  $\arg \min_x M_f^\gamma(x) = \arg \min_x f(x) \subseteq \{x : x \in \text{prox}_{\gamma f}(x)\}$ .

**Lemma 18.** Let  $f : \mathbb{R}^d \mapsto \mathbb{R}$  be  $\rho$ -weakly convex with  $\rho > 0$  and differentiable. If we take  $0 < \gamma < \frac{1}{\rho}$ , then  $M_{f_i}^\gamma$  has the same set of stationary points as  $f_i$ .

For the sake of simplicity, we will consider only the full participation case with a constant extrapolation parameter  $\alpha_k = \alpha$ . The following lemma describes the convergence of GD in the non-convex case, which is adapted from the theory of Khaled and Richtárik [2023].

**Lemma 19.** Assume function  $f$  is  $L$ -smooth and lower bounded. If we are running GD with a constant stepsize  $\eta$  satisfying  $0 < \eta < \frac{1}{L}$ . Then for any  $K \geq 1$ , the iterates  $x_k$  of GD satisfy

$$\min_{0 \leq k \leq K-1} \mathbb{E} [\|\nabla f(x_k)\|^2] \leq \frac{2(f(x_0) - \inf f)}{\eta K}.$$

Now we directly apply Lemma 19 in our case,

1. Since each  $M_{f_i}^\gamma$  is  $L_{\gamma, \rho}$ -smooth,  $M^\gamma$  is  $L_\gamma$ -smooth with  $L_\gamma \leq L_{\gamma, \rho}$ , which result in the following bound on the extrapolation parameter

$$0 < \alpha < \frac{1}{\gamma L_\gamma}.$$

Notice that in this case we have the following estimation of  $\gamma L_\gamma$ ,

$$\frac{1}{\gamma L_\gamma} \geq \frac{1}{\gamma L_{\gamma, \rho}} = \min \left\{ 1, \frac{1 - \gamma \rho}{\gamma \rho} \right\}.$$

This suggests that extrapolation may not be much beneficiary in the non-convex case.

2. The following convergence guarantee can be obtained.

$$\min_{0 \leq k \leq K-1} \mathbb{E} [\|\nabla M^\gamma(x_k)\|^2] \leq \frac{2(M^\gamma(x_0) - \inf M^\gamma)}{\alpha \gamma K}.$$

Notice that by Lemma 17, we know that  $M_{f_i}^\gamma(x_0) \leq f_i(x_0)$ . We also have  $\inf M^\gamma \geq \frac{1}{n} \sum_{i=1}^n \inf M_{f_i}^\gamma = \frac{1}{n} \sum_{i=1}^n \inf f_i$  since  $\inf M_{f_i}^\gamma = \inf f_i$  is true for each client by Lemma 17. Thus, we have

$$M^\gamma(x_0) - \inf M^\gamma \leq f(x_0) - \inf f + \inf f - \frac{1}{n} \sum_{i=1}^n \inf f_i.$$

We can relax the above convergence guarantee and obtain

$$\min_{0 \leq k \leq K-1} \mathbb{E} [\|\nabla M^\gamma(x_k)\|^2] \leq \frac{2(f(x_0) - \inf f)}{\alpha \gamma K} + \frac{2(\inf f - \frac{1}{n} \sum_{i=1}^n \inf f_i)}{\alpha \gamma K}.$$

The above convergence guarantee indicates that the algorithm converges to some stationary points of  $M^\gamma(x)$  in the non-convex case.

3. In the non-convex case, we did not assume anything similar to the interpolation regime in the convex case. As a result, we did not know the relation between the set of stationary points of  $M^\gamma(x)$  and  $f(x)$ , denoted as  $\mathcal{Y}'$  and  $\mathcal{Y}$ , respectively. However, if we assume, in addition, that each stationary point  $y' \in \mathcal{Y}'$  of  $M^\gamma$  is also a stationary point of each  $M_{f_i}^\gamma$ , then  $y'$  is also a stationary point of  $f_i$  according to Lemma 18. Thus,  $\nabla f(y') = \frac{1}{n} \sum_{i=1}^n \nabla f_i(y') = 0$ , which indicates  $y' \in \mathcal{Y}$ . As a result, we have  $\mathcal{Y}' \subseteq \mathcal{Y}$ . This means that under this additional assumption, the algorithm converges to a stationary point of  $f$ .

## 716 E.5 Additional notes on adaptive variants

717 **Notes on gradient diversity variant.** In general, the gradient diversity step size  $\eta_k$  used in [SGD](#) to  
718 solve the finite sum minimization problem

$$\min_{x \in \mathbb{R}^d} \left\{ f(x) = \frac{1}{n} \sum_{i=1}^n f_i(x) \right\},$$

719 can be written as

$$\eta_k := \frac{1}{L_{\max}} \cdot \frac{\frac{1}{n} \sum_{i=1}^n \|\nabla f_i(x_k)\|^2}{\left\| \frac{1}{n} \sum_{i=1}^n \nabla f_i(x_k) \right\|^2},$$

720 where  $L_{\max}$  is the maximum of local smoothness constants. In our case, since each local Moreau  
721 envelope is  $\frac{L_i}{1+\gamma L_i}$ -smooth and  $\frac{1}{\gamma}$ -smooth<sup>4</sup>, we can use both  $\frac{L_{\max}}{1+\gamma L_{\max}}$  (here in Corollary 2, if we know  
722  $L_{\max}$ ) and  $\frac{1}{\gamma}$  (in original Theorem 2, if we do not know  $L_{\max}$ ) as the maximum of local smoothness.  
723 We present the convergence result of Algorithm 1 with the following rule given in (13),

$$\alpha'_{k,G} = \frac{1 + \gamma L_{\max}}{\gamma L_{\max}} \cdot \frac{\frac{1}{n} \sum_{i=1}^n \|x_k - \text{prox}_{\gamma f_i}(x_k)\|^2}{\left\| \frac{1}{n} \sum_{i=1}^n (x_k - \text{prox}_{\gamma f_i}(x_k)) \right\|^2}.$$

724

725 **Corollary 2.** Suppose all the assumptions mentioned in Theorem 2 hold, if we are using (13) to  
726 determine  $\alpha'_{k,G}$  in each iteration for Algorithm 1 with  $\tau = n$ , then the iterates satisfy

$$\mathbb{E}[f(\bar{x}_K)] - f^{\inf} \leq \left( \frac{1}{\gamma} + L_{\max} \right) \cdot \frac{\|x_0 - x_{\star}\|^2}{\sum_{k=0}^{K-1} \alpha'_{k,G}}.$$

727 where  $\bar{x}_K$  is chosen randomly from the first  $K$  iterates  $\{x_0, x_1, \dots, x_{K-1}\}$  with probabilities  $p_k =$   
728  $\alpha'_{k,G} / \sum_{k=0}^{K-1} \alpha'_{k,G}$ .

729 Notice that compared to the case of [FedExProx-GraDS](#) in Theorem 2, the convergence rate given in  
730 Corollary 2 is indeed better. This can be seen by comparing them directly, for [FedExProx-GraDS](#),  
731 we have

$$\mathbb{E}[f(\bar{x}_K)] - \inf f \leq \frac{1 + \gamma L_{\max}}{2 + \gamma L_{\max}} \cdot \left( \frac{1}{\gamma} + L_{\max} \right) \cdot \frac{\|x_0 - x_{\star}\|^2}{\sum_{k=0}^{K-1} \alpha_{k,G}},$$

732 and for Algorithm 1 with  $\alpha'_{k,G}$  given in (13), we have

$$\begin{aligned} \mathbb{E}[f(\bar{x}_K)] - f^{\inf} &\leq \left( \frac{1}{\gamma} + L_{\max} \right) \cdot \frac{\|x_0 - x_{\star}\|^2}{\sum_{k=0}^{K-1} \alpha'_{k,G}} \\ &= \frac{\gamma L_{\max}}{1 + \gamma L_{\max}} \cdot \left( \frac{1}{\gamma} + L_{\max} \right) \cdot \frac{\|x_0 - x_{\star}\|^2}{\sum_{k=0}^{K-1} \alpha_{k,G}}. \end{aligned}$$

733 Since

$$\frac{\gamma L_{\max}}{1 + \gamma L_{\max}} \leq \frac{1 + \gamma L_{\max}}{2 + \gamma L_{\max}}, \quad \forall \gamma > 0,$$

734 the convergence of Algorithm 1 in the full participation case with (13) given in Corollary 2 is indeed  
735 better than [FedExProx-GraDS](#). However, this adaptive rule is only practical when we have the  
736 knowledge of local smoothness.

737 **Notes on stochastic Polyak variant.** In this paragraph, we further elaborate on the convergence of  
738 [FedExProx-StoPS](#). We start by providing a lower bound on the adaptive extrapolation parameter.

739 **Lemma 20.** Suppose that all assumptions mentioned in Theorem 2 hold, then the following inequali-  
740 ties hold for any  $x \in \mathbb{R}^d$  and  $x_{\star}$  that is a minimizer of  $f$ ,

$$\frac{\frac{1}{n} \sum_{i=1}^n (M_{f_i}^{\gamma}(x) - M_{f_i}^{\gamma}(x_{\star}))}{\gamma \cdot \left\| \frac{1}{n} \sum_{i=1}^n \nabla M_{f_i}^{\gamma}(x) \right\|^2} \geq \frac{1}{2\gamma L_{\gamma}}.$$

<sup>4</sup>Note that  $\frac{L_i}{1+\gamma L_i} < \frac{1}{\gamma}$  for any  $\gamma > 0$ .

741 Using the above lower bound, we can further write the convergence of *FedExProx-StoPS* as

$$\mathbb{E}[f(\bar{x}^K)] - \inf f \leq 2L_\gamma(1 + 2\gamma L_{\max}) \cdot \frac{\|x_0 - x_\star\|^2}{K}.$$

742 Observe that we recover the favorable dependence of convergence on the smoothness of  $M^\gamma$ . However,  
 743 this comes at the price of having to know each  $M_{f_i}^\gamma(x_\star)$  or, equivalently in the interpolation regime,  
 744 knowing  $M^\gamma(x_\star)$ .

## 745 F.6 Extension of adaptive variants into client partial participation (PP) setting

746 In this subsection, we extend the adaptive variants of *FedExProx* into the stochastic setting. We  
 747 will refer to them as *FedExProx-GraDS-PP* and *FedExProx-StoPS-PP* respectively. Specifically,  
 748 we consider that the server chooses the client using the  $\tau$ -nice sampling strategy we have intro-  
 749 duced before in Algorithm 1. The following theorem summarizes the convergence guarantee of  
 750 *FedExProx-GraDS-PP* and *FedExProx-StoPS-PP* in the convex case. Its extension to the strongly  
 751 convex case where we additionally assume Assumption 5 (Strong convexity) is straight forward.

752 **Theorem 5.** Suppose Assumption 1 (Differentiability), Assumption 2 (Interpolation regime), Assump-  
 753 tion 3 (Convexity) and Assumption 4 (Smoothness) hold. Assume we are running *FedExProx* with  
 754  $\tau$ -nice client sampling.

755 (i) (*FedExProx-GraDS-PP*): If we are using  $\alpha_k = \alpha_{\tau,k,G}(x_k, S_k)$ , where

$$\alpha_{\tau,k,G}(x_k, S_k) = \frac{\frac{1}{\tau} \sum_{i \in S_k} \|x_k - \text{prox}_{\gamma f_i}(x_k)\|^2}{\left\| \frac{1}{\tau} \sum_{i \in S_k} (x_k - \text{prox}_{\gamma f_i}(x_k)) \right\|^2}. \quad (19)$$

756 Then the iterates of Algorithm 1 satisfy

$$\mathbb{E}[f(\bar{x}_K)] - \inf f \leq \left( \frac{1 + \gamma L_{\max}}{2 + \gamma L_{\max}} \right) \cdot \left( \frac{1}{\gamma} + L_{\max} \right) \cdot \frac{\|x_0 - x_\star\|^2}{\inf \alpha_{\tau,k,G} \cdot K}, \quad (20)$$

757 where  $K$  is the total number of iteration,  $\bar{x}_K$  is samples uniformly at random from the first  
 758  $K$  iterates  $\{x_0, x_1, \dots, x_{K-1}\}$ ,  $\inf \alpha_{\tau,k,G}$  is defined as

$$\inf \alpha_{\tau,k,G} := \inf_{x \in \mathbb{R}^d, S \subseteq [n], |S|=\tau} \alpha_{\tau,k,G}(x, S).$$

759 satisfying

$$\alpha_{\tau,k,G}(x_k, S_k) \geq \inf \alpha_{\tau,k,G} \geq 1.$$

760 (ii) (*FedExProx-StoPS-PP*): If we are using  $\alpha_k = \alpha_{\tau,k,S}(x_k, S_k)$ , where

$$\alpha_{\tau,k,S}(x_k, S_k) = \frac{\frac{1}{\tau} \sum_{i=1}^{\tau} (M_{f_i}^\gamma(x_k) - \inf M_{f_i}^\gamma)}{\gamma \left\| \frac{1}{\tau} \sum_{i=1}^{\tau} \nabla M_{f_i}^\gamma(x_k) \right\|^2}. \quad (21)$$

761 Then the iterates of Algorithm 1 satisfy

$$\mathbb{E}[f(\bar{x}_K)] - \inf f \leq \left( \frac{1}{\gamma} + L_{\max} \right) \cdot \frac{\|x_0 - x_\star\|^2}{\inf \alpha_{\tau,k,S} \cdot K}, \quad (22)$$

762 where  $K$  is the total number of iteration,  $\bar{x}_K$  is sampled uniformly at random from the first  
 763  $K$  iterates  $\{x_0, x_1, \dots, x_{K-1}\}$ ,  $\inf \alpha_{\tau,k,S}$  is defined as

$$\inf \alpha_{\tau,k,S} := \inf_{x \in \mathbb{R}^d, S \subseteq [n], |S|=\tau} \alpha_{\tau,k,S}(x, S).$$

764 satisfying

$$\alpha_{\tau,k,S}(x_k, S_k) \geq \inf \alpha_{\tau,k,S} \geq \frac{1}{2} \left( 1 + \frac{1}{\gamma L_{\max}} \right).$$

765 **Remark 15.** For *FedExProx-GraDS-PP*, different from the full participation setting, the denomina-  
 766 tor of the sublinear term on the right-hand side of (20) is replaced by  $K \cdot \inf \alpha_{\tau,k,G}$ .

Table 5: Summary of convergence of new algorithms appeared in our paper in the convex setting. The  $\mathcal{O}(\cdot)$  notation is hidden for all complexities in this table. For convergence in the full client participation case, results of Theorem 1 and Theorem 2 are used where the relevant notations are defined. For convergence in the partial participation, the results of Theorem 5 are used.

| Method                 | Full Participation                                               | Partial Participation                                         | Single Client                                              |
|------------------------|------------------------------------------------------------------|---------------------------------------------------------------|------------------------------------------------------------|
| <b>FedExProx</b>       | $L_\gamma(1+\gamma L_{\max})/K$                                  | $L_{\gamma,\tau}(1+\gamma L_{\max})/K$                        | $L_{\max}/K$                                               |
| <b>FedExProx-GraDS</b> | $(1+\gamma L_{\max})/\gamma \cdot \sum_{k=0}^{K-1} \alpha_{k,G}$ | $(1+\gamma L_{\max})/(\gamma K \cdot \inf \alpha_{\tau,k,G})$ | $(1+\gamma L_{\max})/(\gamma K)$                           |
| <b>FedExProx-StoPS</b> | $(1+\gamma L_{\max})/\gamma \cdot \sum_{k=0}^{K-1} \alpha_{k,S}$ | $(1+\gamma L_{\max})/(\gamma K \cdot \inf \alpha_{\tau,k,S})$ | $(1+\gamma L_{\max})/(\gamma K \cdot \inf \alpha_{1,k,S})$ |

(i) In the single client case ( $\tau = 1$ ), we have

$$\alpha_{1,k,G} = \inf \alpha_{1,k,G} = 1.$$

(ii) In the partial participation case ( $1 < \tau < n$ ), it is possible that

$$\inf \alpha_{\tau,k,G} > 1,$$

resulting in acceleration compared to single client case.

(iii) For the full participation case ( $\tau = n$ ), we have

$$\alpha_{k,G} = \alpha_{n,k,G},$$

and

$$\sum_{k=0}^{K-1} \alpha_{k,G} \geq K \cdot \inf \alpha_{n,k,G},$$

thus the convergence guarantee here is a relaxed version of that presented in Theorem 2.

A similar discussion also applies to **FedExProx-StoPS-PP** in the client partial participation setting.

**Remark 16.** For **FedExProx-StoPS-PP**, different from the full participation setting, the denominator of the sublinear term on the right-hand side of (22) is replaced by  $K \cdot \inf \alpha_{\tau,k,S}$ .

(i) In the single client case ( $\tau = 1$ ), we have

$$\alpha_{1,k,S} \geq \inf \alpha_{1,k,G} = \frac{1}{2} \left( 1 + \frac{1}{\gamma L_{\max}} \right).$$

(ii) In the partial participation case ( $1 < \tau < n$ ), it is possible that

$$\inf \alpha_{\tau,k,S} > \frac{1}{2} \left( 1 + \frac{1}{\gamma L_{\max}} \right),$$

resulting in acceleration compared to single client case.

(iii) For the full participation case ( $\tau = n$ ), we have

$$\alpha_{k,S} = \alpha_{n,k,S},$$

and

$$\sum_{k=0}^{K-1} \alpha_{k,S} \geq K \cdot \inf \alpha_{n,k,S},$$

thus the convergence guarantee here is a relaxed version of that presented in Theorem 2.

The following Table 5 summarizes the convergence of new algorithms and their variants appeared in our paper.

## G Missing proofs of theorems and corollaries

### G.1 Proof of Theorem 1

The proof of this theorem can be divided into three parts.

**Step 1: Reformulate the algorithm using Moreau envelope.** We know from Lemma 2 that for any  $x \in \mathbb{R}^d$ .

$$\nabla M_{f_i}^\gamma(x) = \frac{1}{\gamma} (x - \text{prox}_{\gamma f_i}(x)).$$

Using the above identity, we can rewrite the update rule given in (7) in the following form,

$$x_{k+1} = x_k - \alpha_k \gamma \cdot \frac{1}{n} \sum_{i=1}^n \nabla M_{f_i}^\gamma(x_k). \quad (23)$$

The above reformulation suggests that running [FedExProx](#) with  $\tau$ -nice sampling strategy is equivalent to running [SGD](#) with  $\tau$ -nice sampling to the global objective  $M^\gamma(x) = \frac{1}{n} \sum_{i=1}^n M_{f_i}^\gamma(x)$  with step size  $\alpha_k \gamma$ . Now, it seems natural to apply the theory of [SGD](#) adapted in Theorem 3. However, before proceeding, we list the properties we know about the global objective  $M^\gamma$  and each local objective  $M_{f_i}^\gamma$ .

1. Each  $M_{f_i}^\gamma(x)$  is convex. This is a consequence of a direct application of Lemma 3 to each  $f_i$ . Since  $M^\gamma$  is the average of convex functions  $M_{f_i}^\gamma$ , we conclude that  $M^\gamma(x)$  is also convex.
2. Each  $M_{f_i}^\gamma(x)$  is  $\frac{L_i}{1+\gamma L_i}$ -smooth, where  $L_i$  is the smoothness constant of  $f_i$ . This is proved by applying Lemma 4 to each  $f_i$ . Drawing on Lemma 13 for justification, it is reasonable to assume  $M^\gamma(x)$  is  $L_\gamma$ -smooth with  $L_\gamma \leq \frac{1}{n} \sum_{i=1}^n \frac{L_i}{1+\gamma L_i}$ -smooth.
3. Each  $M_{f_i}^\gamma(x)$  has the same set of minimizers and minimum as  $f_i$ . This result arises from applying Lemma 5 to each function  $f_i$ .
4. Furthermore, if Assumption 2 (Interpolation Regime) holds,  $M^\gamma(x)$  and  $f(x)$  have the same set of minimizers and minimum. This is demonstrated in Lemma 8.

**Step 2: Applying the theory of gradient type methods.** Notice that here  $M_{f_i}^\gamma(x)$  is  $\frac{L_i}{1+\gamma L_i}$ -smooth and convex,  $M^\gamma(x)$  is convex and  $L_\gamma$ -smooth. Furthermore, due to the assumption of interpolation regime,  $M^\gamma(x)$  and  $f(x)$  have the same set of minimizers. Applying the theory of [SGD](#) with  $\tau$ -nice sampling in this case, where

$$A_\tau = L_{\gamma, \tau} = \frac{n - \tau}{\tau(n - 1)} \cdot \max_{i \in [n]} \left( \frac{L_i}{1 + \gamma L_i} \right) + \frac{n(\tau - 1)}{\tau(n - 1)} L_\gamma.$$

Notice that using Fact 4, we know that

$$\max_{i \in [n]} \left( \frac{L_i}{1 + \gamma L_i} \right) \stackrel{\text{Fact 4}}{=} \frac{L_{\max}}{1 + \gamma L_{\max}},$$

thus  $L_\gamma$  can be simplified and written as

$$L_{\gamma, \tau} = \frac{n - \tau}{\tau(n - 1)} \cdot \frac{L_{\max}}{1 + \gamma L_{\max}} + \frac{n(\tau - 1)}{\tau(n - 1)} L_\gamma,$$

where  $L_{\max} = \max_i L_i$ . We obtain the following result given that  $0 < \alpha\gamma < \frac{2}{L_{\gamma, \tau}}$  in the convex setting,

$$\mathbb{E}[M^\gamma(\bar{x}_K)] - M^\gamma(x_\star) \stackrel{\text{Theorem 3}}{\leq} \frac{1}{\alpha\gamma(2 - \alpha\gamma L_{\gamma, \tau})} \cdot \frac{\|x_0 - x_\star\|^2}{K},$$

where  $\bar{x}_K$  is sampled uniformly at random from the first  $K$  iterates  $\{x_0, x_1, \dots, x_{K-1}\}$ . However, the convergence mentioned pertains to  $M^\gamma(x)$ . Given our objective is to solve (1), it is necessary to reinterpret this outcome in terms of  $f$ .

816 **Step 3: Translate the result into function values of  $f$ .** This step is only needed in the convex  
 817 setting. We use the lower bound in Lemma 10,

$$M^\gamma(\bar{x}_K) - M^\gamma(x_\star) \stackrel{(18)}{\geq} \frac{1}{1 + \gamma L_{\max}} (f(\bar{x}_K) - f(x_\star)),$$

818 to obtain the following result

$$\mathbb{E}[f(\bar{x}_K)] - f(x_\star) \leq \frac{1 + \gamma L_{\max}}{\alpha \gamma (2 - \alpha \gamma L_{\gamma, \tau})} \cdot \frac{\|x_0 - x_\star\|^2}{K}.$$

819 Observe that we have

$$C(\gamma, \tau, \alpha) = \frac{1 + \gamma L_{\max}}{\alpha \gamma (2 - \alpha \gamma L_{\gamma, \tau})},$$

820 and its numerator does not depend on  $\alpha$ . If we fix the choice of  $\gamma$  and  $\tau$ , then the denominator is  
 821 maximized when  $\alpha \gamma L_{\gamma, \tau} = 1$ . This yields the optimal constant extrapolation parameter  $\alpha_{\gamma, \tau} =$   
 822  $\frac{1}{\gamma L_{\gamma, \tau}}$  and the following convergence corresponding to it

$$\mathbb{E}[f(\bar{x}_K)] - f(x_\star) \leq L_{\gamma, \tau} (1 + \gamma L_{\max}) \cdot \frac{\|x_0 - x_\star\|^2}{K}.$$

823 Finally, notice that

$$\gamma L_\gamma \stackrel{\text{Lemma 13}}{\leq} \frac{1}{n} \sum_{i=1}^n \frac{\gamma L_i}{1 + \gamma L_i} < 1,$$

824 for any  $\gamma > 0$ . This suggests that,

$$\begin{aligned} \gamma L_{\gamma, \tau} &= \frac{n - \tau}{\tau(n - 1)} \cdot \frac{\gamma L_{\max}}{1 + \gamma L_{\max}} + \frac{n(\tau - 1)}{\tau(n - 1)} \gamma L_\gamma \\ &< \frac{n - \tau}{\tau(n - 1)} + \frac{n(\tau - 1)}{\tau(n - 1)} = 1, \end{aligned}$$

825 which in turn tells us  $\alpha_{\gamma, \tau} = \frac{1}{\gamma L_{\gamma, \tau}} > 1$ . This concludes the proof.

## 826 G.2 Proof of Theorem 2

827 We start with the following decomposition,

$$\begin{aligned} \|x_{k+1} - x_\star\|^2 &= \|x_k - \alpha_k \gamma \nabla M^\gamma(x_k) - x_\star\|^2 \\ &= \|x_k - x_\star\|^2 - 2\alpha_k \gamma \langle \nabla M^\gamma(x_k), x_k - x_\star \rangle + \alpha_k^2 \gamma^2 \|\nabla M^\gamma(x_k)\|^2. \end{aligned} \quad (24)$$

828 **Case 1: FedExProx-GraDS** For gradient diversity based  $\alpha_k$ , we have

$$\alpha_k = \alpha_{k, G} = \frac{\frac{1}{n} \sum_{i=1}^n \left\| \gamma \nabla M_{f_i}^\gamma(x_k) \right\|^2}{\left\| \gamma \nabla M^\gamma(x_k) \right\|^2} = \frac{\frac{1}{n} \sum_{i=1}^n \left\| \nabla M_{f_i}^\gamma(x_k) \right\|^2}{\left\| \nabla M^\gamma(x_k) \right\|^2}.$$

829 For the last term of (24),

$$\begin{aligned} \alpha_{k, G}^2 \gamma^2 \|\nabla M^\gamma(x_k)\|^2 &= \alpha_{k, G} \gamma^2 \cdot \frac{1}{n} \sum_{i=1}^n \left\| \nabla M_{f_i}^\gamma(x_k) \right\|^2 \\ &= \alpha_{k, G} \gamma^2 \cdot \frac{1}{n} \sum_{i=1}^n \left\| \nabla M_{f_i}^\gamma(x_k) - \nabla M_{f_i}^\gamma(x_\star) \right\|^2 \\ &\stackrel{(16)}{\leq} \alpha_{k, G} \gamma^2 \cdot \frac{1}{n} \sum_{i=1}^n \frac{L_i}{1 + \gamma L_i} \left( D_{M_{f_i}^\gamma}(x_k, x_\star) + D_{M_{f_i}^\gamma}(x_\star, x_k) \right), \end{aligned}$$



where the last inequality follows from the  $\frac{L_i}{1+\gamma L_i}$ -smoothness of  $M_{f_i}^\gamma$  given in Lemma 4. We further obtain using Fact 4 that

$$\begin{aligned}\alpha_{k,G}^2 \gamma^2 \|\nabla M^\gamma(x_k)\|^2 &\stackrel{\text{Fact 4}}{\leq} \alpha_{k,G} \gamma^2 \cdot \frac{L_{\max}}{1+\gamma L_{\max}} \cdot (D_{M^\gamma}(x_k, x_\star) + D_{M^\gamma}(x_\star, x_k)) \\ &= \alpha_{k,G} \gamma \cdot \frac{\gamma L_{\max}}{1+\gamma L_{\max}} (D_{M^\gamma}(x_k, x_\star) + D_{M^\gamma}(x_\star, x_k)).\end{aligned}\quad (25)$$

For the second term of (24), we have

$$\begin{aligned}-2\alpha_{k,G} \gamma \langle \nabla M^\gamma(x_k), x_k - x_\star \rangle &= 2\alpha_{k,G} \gamma \langle \nabla M^\gamma(x_k) - \nabla M^\gamma(x_\star), x_\star - x_k \rangle \\ &= -2\alpha_{k,G} \gamma (D_{M^\gamma}(x_k, x_\star) + D_{M^\gamma}(x_\star, x_k)).\end{aligned}\quad (26)$$

Plugging (26) and (25) into (24), we have

$$\|x_{k+1} - x_\star\|^2 \leq \|x_k - x_\star\|^2 - \alpha_{k,G} \gamma \left(2 - \frac{\gamma L_{\max}}{1+\gamma L_{\max}}\right) (D_{M^\gamma}(x_k, x_\star) + D_{M^\gamma}(x_\star, x_k)).$$

Notice that we know that

$$D_{M^\gamma}(x_k, x_\star) \stackrel{(14)}{=} M^\gamma(x_k) - M^\gamma(x_\star), \quad D_{M^\gamma}(x_\star, x_k) \stackrel{(15)}{\geq} 0.$$

As a result, we obtain

$$\|x_{k+1} - x_\star\|^2 \leq \|x_k - x_\star\|^2 - \alpha_{k,G} \gamma \left(2 - \frac{\gamma L_{\max}}{1+\gamma L_{\max}}\right) (M^\gamma(x_k) - M^\gamma(x_\star)).$$

Summing up the above recursion for  $k = 0, 1, \dots, K-1$ , we notice that many of them will telescope and  $M^\gamma(x_\star) = \inf M^\gamma$  due to interpolation regime as it is proved by Lemma 8. Thus, we obtain

$$\gamma \left(2 - \frac{\gamma L_{\max}}{1+\gamma L_{\max}}\right) \sum_{k=0}^{K-1} \alpha_{k,G} (M^\gamma(x_k) - \inf M^\gamma) \leq \|x_0 - x_\star\|^2.$$

Denote  $p_k = \alpha_{k,G} / \sum_{k=0}^{K-1} \alpha_{k,G}$  for  $k = 0, 1, \dots, K-1$ . If we pick  $\bar{x}_K$  randomly according to probabilities  $p_k$  from the first  $K$  iterates  $\{x_0, x_1, \dots, x_{K-1}\}$ , then we can further write the above recursion as

$$\mathbb{E}[M^\gamma(\bar{x}_K)] - \inf M^\gamma \leq \frac{1+\gamma L_{\max}}{2+\gamma L_{\max}} \cdot \frac{1}{\gamma} \cdot \frac{\|x_0 - x_\star\|^2}{\sum_{k=0}^{K-1} \alpha_{k,G}}.$$

Utilizing Lemma 10, we further obtain,

$$\mathbb{E}[f(\bar{x}_K)] - \inf f \leq \frac{1+\gamma L_{\max}}{2+\gamma L_{\max}} \cdot \left(\frac{1}{\gamma} + L_{\max}\right) \cdot \frac{\|x_0 - x_\star\|^2}{\sum_{k=0}^{K-1} \alpha_{k,G}}.$$

The above inequality indicates convergence. Indeed, by convexity of standard Euclidean norm, we have

$$\alpha_{k,G} \geq \frac{\left\| \frac{1}{n} \sum_{i=1}^n (x_k - \text{prox}_{\gamma f_i}(x_k)) \right\|^2}{\left\| \frac{1}{n} \sum_{i=1}^n (x_k - \text{prox}_{\gamma f_i}(x_k)) \right\|^2} = 1.$$

This tells us that

$$\sum_{k=0}^{K-1} \alpha_{k,G} \geq K.$$

**Case 2: FedExProx-StoPS** For stochastic Polyak step size based  $\alpha_{k,S}$ , since we are in the interpolation regime, by Lemma 9, we have

$$M^\gamma(x_\star) = \inf M^\gamma = \frac{1}{n} \sum_{i=1}^n \inf M_{f_i}^\gamma.$$

As a result,

$$\alpha_k = \alpha_{k,S} = \frac{\frac{1}{n} \sum_{i=1}^n (M_{f_i}^\gamma(x_k) - \inf M_{f_i}^\gamma)}{\gamma \left\| \frac{1}{n} \sum_{i=1}^n \nabla M_{f_i}^\gamma(x_k) \right\|^2} = \frac{M^\gamma(x_k) - M^\gamma(x_\star)}{\gamma \|\nabla M^\gamma(x_k)\|^2}.$$

848 We have for the last term of (24),

$$\alpha_{k,S}^2 \gamma^2 \|\nabla M^\gamma(x_k)\|^2 = \alpha_{k,S} \gamma (M^\gamma(x_k) - M^\gamma(x_\star)). \quad (27)$$

849 For the second term of (24), we have

$$\begin{aligned} -2\alpha_{k,S} \gamma \langle \nabla M^\gamma(x_k), x_k - x_\star \rangle &= 2\alpha_{k,S} \gamma \langle \nabla M^\gamma(x_k), x_\star - x_k \rangle \\ &\stackrel{(5)}{\leq} 2\alpha_{k,S} \gamma (M^\gamma(x_\star) - M^\gamma(x_k)) \\ &= -2\alpha_{k,S} \gamma (M^\gamma(x_k) - M^\gamma(x_\star)), \end{aligned} \quad (28)$$

850 where the inequality is due to the convexity of  $M^\gamma$ . Plugging (28) and (27) into (24), we obtain

$$\|x_{k+1} - x_\star\|^2 \leq \|x_k - x_\star\|^2 - \alpha_{k,S} \gamma (M^\gamma(x_k) - M^\gamma(x_\star)).$$

851 Summing up the above recursion for  $k = 0, 1, \dots, K-1$ , we notice that many of them will telescope.

852 Thus, we obtain

$$\gamma \sum_{k=0}^{K-1} \alpha_{k,S} (M^\gamma(x_k) - \inf M^\gamma) \leq \|x_0 - x_\star\|^2.$$

853 Denote  $p_k = \alpha_{k,S} / \sum_{k=0}^{K-1} \alpha_{k,S}$  for  $k = 0, 1, \dots, K-1$ . If we sample  $\bar{x}^K$  randomly according  
854 to probabilities  $p_k$  from the first  $K$  iterates  $\{x_0, x_1, \dots, x_{K-1}\}$ , we can further write the above  
855 recursion as

$$\mathbb{E}[M^\gamma(\bar{x}^K)] - \inf M^\gamma \leq \frac{1}{\gamma} \cdot \frac{\|x_0 - x_\star\|^2}{\sum_{k=0}^{K-1} \alpha_{k,S}}.$$

856 Utilizing the local bound in Lemma 10, we further obtain,

$$\mathbb{E}[f(\bar{x}^K)] - \inf f \stackrel{(17)}{\leq} \left( \frac{1}{\gamma} + L_{\max} \right) \cdot \frac{\|x_0 - x_\star\|^2}{\sum_{k=0}^{K-1} \alpha_{k,S}}. \quad (29)$$

857 Notice that the above inequality indeed indicates convergence, since

$$\sum_{k=0}^{K-1} \alpha_{k,S} = \sum_{k=0}^{K-1} \frac{M^\gamma(x_k) - M^\gamma(x_\star)}{\gamma \|\nabla M^\gamma(x_k)\|^2} \geq \frac{1}{2\gamma L_\gamma},$$

858 where the inequality follows from Lemma 20. The above upper bounds allow us to further write the  
859 convergence in (29) as

$$\mathbb{E}[f(\bar{x}^K)] - \inf f \leq 2L_\gamma (1 + 2\gamma L_{\max}) \cdot \frac{\|x_0 - x_\star\|^2}{K}.$$

860 This concludes the proof.

### 861 G.3 Proof of Theorem 3

862 We start from the decomposition

$$\|x_{k+1} - x_\star\|^2 = \|x_k - x_\star\|^2 - 2\eta \left\langle x_k - x_\star, \frac{1}{\tau} \sum_{i \in S_k} \nabla f_i(x_k) \right\rangle + \eta^2 \left\| \frac{1}{\tau} \sum_{i \in S_k} \nabla f_i(x_k) \right\|^2,$$

863 where  $S_k$  is the set sampled at iteration  $k$ . Taking expectation conditioned on  $x_k$ , we have

$$\begin{aligned} &\mathbb{E}_{S_k} \left[ \|x_{k+1} - x_\star\|^2 \right] \\ &= \|x_k - x_\star\|^2 - 2\eta \langle x_k - x_\star, \nabla f(x_k) - \nabla f(x_\star) \rangle + \eta^2 \mathbb{E}_{S_k} \left[ \left\| \frac{1}{\tau} \sum_{i \in S_k} \nabla f_i(x_k) \right\|^2 \right]. \end{aligned}$$

864 We can write the second inner product term as

$$\langle x_k - x_\star, \nabla f(x_k) - \nabla f(x_\star) \rangle \stackrel{(14)}{=} D_f(x_k, x_\star) + D_f(x_\star, x_k), \quad (30)$$

865 where  $D_f(x_k, x_*)$  denotes the Bregman divergence associated with  $f$  between  $x_k$  and  $x_*$ . For the  
 866 last squared norm term, we first define the indicator random variable  $\chi_{k,i}$  as

$$\chi_{k,i} = \begin{cases} 1, & \text{when } i \in S_k, \\ 0, & \text{when } i \notin S_k. \end{cases}$$

867 Since we are in the interpolation regime, we have

$$\mathbb{E}_{S_k} \left[ \left\| \frac{1}{\tau} \sum_{i \in S_k} \nabla f_i(x_k) \right\|^2 \right] = \mathbb{E}_{S_k} \left[ \left\| \frac{1}{\tau} \sum_{i=1}^n \chi_{k,i} (\nabla f_i(x_k) - \nabla f_i(x_*)) \right\|^2 \right].$$

868 Denote  $a_{k,i} = \nabla f_i(x_k) - \nabla f_i(x_*)$ ,

$$\begin{aligned} & \mathbb{E}_{S_k} \left[ \left\| \frac{1}{\tau} \sum_{i=1}^n \chi_{k,i} (\nabla f_i(x_k) - \nabla f_i(x_*)) \right\|^2 \right] \\ &= \mathbb{E}_{S_k} \left[ \left\| \frac{1}{\tau} \sum_{i=1}^n \chi_{k,i} a_{k,i} \right\|^2 \right] \\ &= \frac{1}{\tau^2} \mathbb{E}_{S_k} \left[ \sum_{i=1}^n \chi_{k,i} \|a_{k,i}\|^2 + \sum_{1 \leq i \neq j \leq n} \chi_{k,i} \chi_{k,j} \langle a_{k,i}, a_{k,j} \rangle \right] \\ &= \frac{1}{\tau^2} \sum_{i=1}^n \mathbb{E}_{S_i^k} [\chi_{k,i}^2] \|a_{k,i}\|^2 + \sum_{1 \leq i \neq j \leq n} \mathbb{E}_{S_i^k} [\chi_{k,i} \chi_{k,j}] \langle a_{k,i}, a_{k,j} \rangle \\ &= \frac{1}{n\tau} \sum_{i=1}^n \|a_{k,i}\|^2 + \frac{\tau-1}{n\tau(n-1)} \left( \left\| \sum_{i=1}^n a_{k,i} \right\|^2 - \sum_{i=1}^n \|a_{k,i}\|^2 \right) \\ &= \frac{n-\tau}{\tau(n-1)} \cdot \frac{1}{n} \sum_{i=1}^n \|a_{k,i}\|^2 + \frac{n(\tau-1)}{\tau(n-1)} \cdot \left\| \frac{1}{n} \sum_{i=1}^n a_{k,i} \right\|^2. \end{aligned} \quad (31)$$

869 For the first term above in (31), due to the smoothness and convexity of each  $f_i$ , we have

$$\begin{aligned} \frac{1}{n} \sum_{i=1}^n \|a_{k,i}\|^2 &= \frac{1}{n} \sum_{i=1}^n \|\nabla f_i(x_k) - \nabla f_i(x_*)\|^2 \\ &\leq \frac{1}{n} \sum_{i=1}^n L_i (D_{f_i}(x_*, x_k) + D_{f_i}(x_k, x_*)) \\ &\leq L_{\max} \frac{1}{n} \sum_{i=1}^n (D_{f_i}(x_*, x_k) + D_{f_i}(x_k, x_*)) \\ &= L_{\max} (D_f(x_*, x_k) + D_f(x_k, x_*)), \end{aligned}$$

870 where the first inequality is obtained as a result of Fact 3. For the second term, we have due to the  
 871 smoothness and convexity of  $f$ ,

$$\begin{aligned} \left\| \frac{1}{n} \sum_{i=1}^n a_{k,i} \right\|^2 &= \left\| \frac{1}{n} \sum_{i=1}^n (\nabla f_i(x_k) - \nabla f_i(x_*)) \right\|^2 \\ &= \|\nabla f(x_k) - \nabla f(x_*)\|^2 \\ &\leq L (D_f(x_*, x_k) + D_f(x_k, x_*)), \end{aligned}$$

872 where the inequality is obtained using Fact 3. Combining the above two inequalities and plugging  
 873 them into (31), we obtain

$$\mathbb{E}_{S_k} \left[ \left\| \frac{1}{\tau} \sum_{i \in S_k} \nabla f_i(x_k) \right\|^2 \right] \leq \left( \frac{n-\tau}{\tau(n-1)} \cdot L_{\max} + \frac{n(\tau-1)}{\tau(n-1)} \cdot L \right) (D_f(x_*, x_k) + D_f(x_k, x_*)). \quad (32)$$

874 Notice that we already defined  $A_\tau$  as

$$A_\tau = \frac{n - \tau}{\tau(n - 1)} \cdot L_{\max} + \frac{n(\tau - 1)}{\tau(n - 1)} \cdot L.$$

875 Combining (30) and (32), we have

$$\mathbb{E}_{S_k} \left[ \|x_{k+1} - x_\star\|^2 \right] \leq \|x_k - x_\star\|^2 - \eta(2 - \eta A_\tau) (D_f(x_\star, x_k) + D_f(x_k, x_\star)).$$

876 If we require  $0 < \eta < \frac{2}{A_\tau}$ , we have  $\eta(2 - \eta A_\tau) \geq 0$ .

877 **Convex regime.** It remains to notice that  $D_f(x_k, x_\star) + D_f(x_\star, x_k) \geq D_f(x_k, x_\star) = f(x_k) -$   
878  $f(x_\star) \geq 0$ , and we have

$$\mathbb{E}_{S_k} \left[ \|x_{k+1} - x_\star\|^2 \right] \leq \|x_k - x_\star\|^2 - \eta(2 - \eta A_\tau) (f(x_k) - f(x_\star)).$$

879 Taking expectation again and using tower property, we get

$$\mathbb{E} \left[ \|x_{k+1} - x_\star\|^2 \right] \leq \mathbb{E} \left[ \|x_k - x_\star\|^2 \right] - \eta(2 - \eta A_\tau) (\mathbb{E} [f(x_k)] - \inf f).$$

880 Unrolling this recurrence, we get

$$\mathbb{E} [f(\bar{x}_K)] - \inf f \leq \frac{1}{\eta(2 - \eta A_\tau)} \cdot \frac{\|x_0 - x_\star\|^2}{K},$$

881 where  $K$  is the total number of iterations,  $\bar{x}_K$  is selected uniformly at random from the first  $K$  iterates  
882  $\{x_0, x_1, \dots, x_{K-1}\}$ .

883 **Star strongly convex regime.** Due to star strong convexity of  $f$ , we further lower bound the  
884 Bregman divergence

$$D_f(x_k, x_\star) = f(x_k) - f(x_\star) \geq \frac{\mu}{2} \|x_k - x_\star\|^2.$$

885 and we have

$$\mathbb{E}_{S_k} \left[ \|x_{k+1} - x_\star\|^2 \right] \leq \left( 1 - \eta(2 - \eta A_\tau) \cdot \frac{\mu}{2} \right) \|x_k - x_\star\|^2.$$

886 Taking expectation again, using tower property we get

$$\mathbb{E} \left[ \|x_{k+1} - x_\star\|^2 \right] \leq \left( 1 - \eta(2 - \eta A_\tau) \cdot \frac{\mu}{2} \right) \mathbb{E} \left[ \|x_k - x_\star\|^2 \right].$$

887 Unrolling the recurrence, we get

$$\mathbb{E} \left[ \|x_K - x_\star\|^2 \right] \leq \left( 1 - \eta(2 - \eta A_\tau) \cdot \frac{\mu}{2} \right)^K \|x_0 - x_\star\|^2.$$

888 This concludes the proof.

#### 889 **G.4 Proof of Theorem 4**

890 Since each  $f_i$  is proper, closed and convex, by Lemma 2, we know that each  $M_{f_i}^\gamma$  is  $\frac{1}{\gamma}$ -smooth.  
891 Therefore, it is reasonable to assume that  $M^\gamma = \frac{1}{n} \sum_{i=1}^n M_{f_i}^\gamma$  is  $L_\gamma$ -smooth, with  $L_\gamma \leq \frac{1}{\gamma}$ . Applying  
892 Theorem 3 in this case, we obtain,

$$M^\gamma(\bar{x}_K) - \inf M^\gamma \stackrel{\text{Theorem 3}}{\leq} \frac{1}{\alpha\gamma(2 - \alpha\gamma L_{\gamma,\tau})} \cdot \frac{\|x_0 - x_\star\|^2}{K},$$

893 where  $\bar{x}_K$  is chosen uniformly at random from the first  $K$  iterates  $\{x_0, x_1, \dots, x_{K-1}\}$ , and

$$L_{\gamma,\tau} = \frac{n - \tau}{\tau(n - 1)} \cdot \frac{1}{\gamma} + \frac{n(\tau - 1)}{\tau(n - 1)} \cdot L_\gamma.$$

894 Multiplying both sides by  $\gamma$ , we obtain

$$\gamma M^\gamma(\bar{x}_K) - \inf \gamma M^\gamma \leq \frac{1}{\alpha(2 - \alpha\gamma L_{\gamma,\tau})} \cdot \frac{\|x_0 - x_\star\|^2}{K}.$$

895 It is easy to see that the coefficient on the right-hand side is minimized when  $\alpha = \frac{1}{\gamma L_{\gamma,\tau}}$ , and the  
896 convergence is given by

$$\gamma M^\gamma(\bar{x}_K) - \inf \gamma M^\gamma \leq \left( \frac{n - \tau}{\tau(n - 1)} + \frac{n(\tau - 1)}{\tau(n - 1)} \cdot \gamma L_\gamma \right) \cdot \frac{\|x_0 - x_\star\|^2}{K}.$$

897 Notice that  $L_\gamma \leq \frac{1}{\gamma}$ . As a result,

$$\alpha_\star = \frac{1}{\gamma L_\gamma} \geq 1.$$

## 898 G.5 Proof of Theorem 5

899 **Case of FedExProx-GraDS-PP.** We start with the following identity

$$\begin{aligned} \|x_{k+1} - x_\star\|^2 &= \|x_k - x_\star\|^2 - 2\alpha_{\tau,k,G} \cdot \gamma \left\langle \frac{1}{\tau} \sum_{i \in S_k} \nabla M_{f_i}^\gamma(x_k), x_k - x_\star \right\rangle \\ &\quad + \alpha_{\tau,k,G}^2 \cdot \gamma^2 \cdot \left\| \frac{1}{\tau} \sum_{i \in S_k} \nabla M_{f_i}^\gamma(x_k) \right\|^2. \end{aligned} \quad (33)$$

900 For the last term, we have

$$\begin{aligned} \alpha_{\tau,k,G}^2 \cdot \gamma^2 \cdot \left\| \frac{1}{\tau} \sum_{i \in S_k} \nabla M_{f_i}^\gamma(x_k) \right\|^2 &= \alpha_{\tau,k,G} \cdot \gamma^2 \cdot \frac{1}{\tau} \sum_{i \in S_k} \left\| \nabla M_{f_i}^\gamma(x_k) \right\|^2 \\ &= \alpha_{\tau,k,G} \cdot \gamma^2 \cdot \frac{1}{\tau} \sum_{i \in S_k} \left\| \nabla M_{f_i}^\gamma(x_k) - \nabla M_{f_i}^\gamma(x_\star) \right\|^2, \end{aligned}$$

901 where the last step is due to the assumption that we are in the interpolation regime. Using Fact 3, we  
902 can further upper bound the above expression,

$$\begin{aligned} &\alpha_{\tau,k,G}^2 \cdot \gamma^2 \cdot \left\| \frac{1}{\tau} \sum_{i \in S_k} \nabla M_{f_i}^\gamma(x_k) \right\|^2 \\ &\leq \alpha_{\tau,k,G} \cdot \gamma^2 \cdot \frac{1}{\tau} \sum_{i \in S_k} \frac{L_i}{1 + \gamma L_i} \left( D_{M_{f_i}^\gamma}(x_k, x_\star) + D_{M_{f_i}^\gamma}(x_\star, x_k) \right) \\ &\leq \alpha_{\tau,k,G} \cdot \gamma \cdot \frac{\gamma L_{\max}}{1 + \gamma L_{\max}} \cdot \frac{1}{\tau} \sum_{i \in S_k} \left( D_{M_{f_i}^\gamma}(x_k, x_\star) + D_{M_{f_i}^\gamma}(x_\star, x_k) \right), \end{aligned} \quad (34)$$

903 where the last inequality is due to Fact 4. Now we look at the second term in Equation (33).

$$\begin{aligned} &- 2\alpha_{\tau,k,G} \cdot \gamma \left\langle \frac{1}{\tau} \sum_{i \in S_k} \nabla M_{f_i}^\gamma(x_k), x_k - x_\star \right\rangle \\ &= -2\alpha_{\tau,k,G} \cdot \gamma \left\langle \frac{1}{\tau} \sum_{i \in S_k} \left( \nabla M_{f_i}^\gamma(x_k) - \nabla M_{f_i}^\gamma(x_\star) \right), x_k - x_\star \right\rangle \\ &= -2\alpha_{\tau,k,G} \cdot \gamma \cdot \frac{1}{\tau} \sum_{i \in S_k} \left( D_{M_{f_i}^\gamma}(x_k, x_\star) + D_{M_{f_i}^\gamma}(x_\star, x_k) \right). \end{aligned} \quad (35)$$

904 Plugging (34) and (35) into (33), we obtain,

$$\begin{aligned}
& \|x_{k+1} - x_\star\|^2 \\
& \leq \|x_k - x_\star\|^2 - \alpha_{\tau,k,G} \cdot \gamma \left( 2 - \frac{\gamma L_{\max}}{1 + \gamma L_{\max}} \right) \cdot \frac{1}{\tau} \sum_{i \in S_k} \left( D_{M_{f_i}^\gamma}(x_k, x_\star) + D_{M_{f_i}^\gamma}(x_\star, x_k) \right) \\
& \leq \|x_k - x_\star\|^2 - \alpha_{\tau,k,G} \cdot \gamma \left( \frac{2 + \gamma L_{\max}}{1 + \gamma L_{\max}} \right) \cdot \frac{1}{\tau} \sum_{i \in S_k} \left( M_{f_i}^\gamma(x_k) - M_{f_i}^\gamma(x_\star) \right), \tag{36}
\end{aligned}$$

905 where the last inequality is due to

$$D_{M_{f_i}^\gamma}(x_k, x_\star) \stackrel{(14)}{=} M_{f_i}^\gamma(x_k) - M_{f_i}^\gamma(x_\star), \quad \text{and} \quad D_{M_{f_i}^\gamma}(x_\star, x_k) \stackrel{(15)}{\geq} 0.$$

906 Now we want to lower bound  $\alpha_{\tau,k,G}$ , notice that it can be viewed as a function of the iterate  $x$  and  
907 the sampled set  $S$ . Therefore, we use the notation

$$\inf \alpha_{\tau,k,G} = \inf_{x \in \mathbb{R}^d, S \subseteq [n], |S|=\tau} \alpha_{\tau,k,G}(x, S).$$

908 As a result, we have

$$\alpha_{\tau,k,G} \geq \inf \alpha_{\tau,k,G} \geq 1,$$

909 where the second inequality comes from the convexity of standard Euclidean norm. Plugging this  
910 lower bound into (36), we obtain

$$\begin{aligned}
& \|x_{k+1} - x_\star\|^2 \\
& \leq \|x_k - x_\star\|^2 - \inf \alpha_{\tau,k,G} \cdot \gamma \left( \frac{2 + \gamma L_{\max}}{1 + \gamma L_{\max}} \right) \cdot \frac{1}{\tau} \sum_{i \in S_k} \left( M_{f_i}^\gamma(x_k) - M_{f_i}^\gamma(x_\star) \right).
\end{aligned}$$

911 Taking expectation conditioned on  $x_k$ , we have

$$\begin{aligned}
& \mathbb{E}_{S_k} \left[ \|x_{k+1} - x_\star\|^2 \right] \\
& \leq \|x_k - x_\star\|^2 - \inf \alpha_{\tau,k,G} \cdot \gamma \left( \frac{2 + \gamma L_{\max}}{1 + \gamma L_{\max}} \right) \cdot \frac{1}{n} \sum_{i=1}^n \left( M_{f_i}^\gamma(x_k) - M_{f_i}^\gamma(x_\star) \right) \\
& = \|x_k - x_\star\|^2 - \inf \alpha_{\tau,k,G} \cdot \gamma \left( \frac{2 + \gamma L_{\max}}{1 + \gamma L_{\max}} \right) \cdot (M^\gamma(x_k) - \inf M),
\end{aligned}$$

912 where the last identity is due to the fact that we are in the interpolation regime. Using Lemma 10, we  
913 have

$$\begin{aligned}
& \mathbb{E}_{S_k} \left[ \|x_{k+1} - x_\star\|^2 \right] \\
& \leq \|x_k - x_\star\|^2 - \inf \alpha_{\tau,k,G} \cdot \gamma \left( \frac{2 + \gamma L_{\max}}{1 + \gamma L_{\max}} \right) \cdot \frac{1}{1 + \gamma L_{\max}} (f(x_k) - \inf f).
\end{aligned}$$

914 Taking expectation again and using tower property, we obtain

$$\begin{aligned}
& \mathbb{E} \left[ \|x_{k+1} - x_\star\|^2 \right] \\
& \leq \mathbb{E} \left[ \|x_k - x_\star\|^2 \right] - \inf \alpha_{\tau,k,G} \cdot \gamma \left( \frac{2 + \gamma L_{\max}}{1 + \gamma L_{\max}} \right) \cdot \frac{1}{1 + \gamma L_{\max}} \mathbb{E} [f(x_k) - \inf f].
\end{aligned}$$

915 Following the same step as Theorem 1, we can unroll the above recurrence and obtain

$$\mathbb{E} [f(\bar{x}_K)] - \inf f \leq \left( \frac{1 + \gamma L_{\max}}{2 + \gamma L_{\max}} \right) \cdot \left( \frac{1}{\gamma} + L_{\max} \right) \cdot \frac{\|x_0 - x_\star\|^2}{\inf \alpha_{\tau,k,G} \cdot K},$$

916 where  $K$  is the total number of iterations,  $\bar{x}_K$  is sampled uniformly at random from the first  $K$ -iterates  
917  $\{x_0, x_1, \dots, x_{K-1}\}$ .



918 **Case of FedExProx-StoPS-PP.** We start with the following identity

$$\begin{aligned} \|x_{k+1} - x_\star\|^2 &= \|x_k - x_\star\|^2 - 2\alpha_{\tau,k,S} \cdot \gamma \left\langle \frac{1}{\tau} \sum_{i \in S_k} \nabla M_{f_i}^\gamma(x_k), x_k - x_\star \right\rangle \\ &\quad + \alpha_{\tau,k,S}^2 \cdot \gamma^2 \cdot \left\| \frac{1}{\tau} \sum_{i \in S_k} \nabla M_{f_i}^\gamma(x_k) \right\|^2. \end{aligned} \quad (37)$$

919 For the last term of Equation (37), we have

$$\begin{aligned} \alpha_{\tau,k,S}^2 \cdot \gamma^2 \cdot \left\| \frac{1}{\tau} \sum_{i \in S_k} \nabla M_{f_i}^\gamma(x_k) \right\|^2 &= \alpha_{\tau,k,S} \cdot \gamma \cdot \frac{1}{\tau} \sum_{i \in S_k} \left( M_{f_i}^\gamma(x_k) - \inf M_{f_i}^\gamma \right) \\ &= \alpha_{\tau,k,S} \cdot \gamma \cdot \frac{1}{\tau} \sum_{i \in S_k} \left( D_{M_{f_i}^\gamma}(x_k, x_\star) \right). \end{aligned} \quad (38)$$

920 While for the second term we have

$$\begin{aligned} &- 2\alpha_{\tau,k,S} \cdot \gamma \left\langle \frac{1}{\tau} \sum_{i \in S_k} \nabla M_{f_i}^\gamma(x_k), x_k - x_\star \right\rangle \\ &= -2\alpha_{\tau,k,S} \cdot \gamma \cdot \frac{1}{\tau} \sum_{i \in S_k} \left( D_{M_{f_i}^\gamma}(x_k, x_\star) + D_{M_{f_i}^\gamma}(x_\star, x_k) \right) \\ &\stackrel{(15)}{\leq} -2\alpha_{\tau,k,S} \cdot \gamma \cdot \frac{1}{\tau} \sum_{i \in S_k} D_{M_{f_i}^\gamma}(x_k, x_\star). \end{aligned} \quad (39)$$

921 Plugging (38) and (39) into (37), we obtain

$$\|x_{k+1} - x_\star\|^2 \leq \|x_k - x_\star\|^2 - \alpha_{\tau,k,S} \cdot \gamma \cdot \frac{1}{\tau} \sum_{i \in S_k} \left( M_{f_i}^\gamma(x_k) - \inf M_{f_i}^\gamma \right). \quad (40)$$

922 Now we want to lower bound  $\alpha_{\tau,k,S}$ , notice that it can be viewed as a function of the iterate  $x$  and  
923 the sampled set  $S$ . Therefore, we use the notation

$$\inf \alpha_{\tau,k,S} = \inf_{x \in \mathbb{R}^d, S \subseteq [n], |S|=\tau} \alpha_{\tau,k,S}(x, S).$$

924 As a result, we have

$$\alpha_{\tau,k,S} \geq \inf \alpha_{\tau,k,S}.$$

925 Notice that since each  $M_{f_i}^\gamma$  is  $\frac{L_i}{1+\gamma L_i}$ -smooth, we conclude that the function  $\frac{1}{\tau} \sum_{i \in S_k} M_{f_i}^\gamma$  is at least  
926  $\frac{L_{\max}}{1+\gamma L_{\max}}$ -smooth<sup>5</sup>. Using the smoothness of the mentioned function and Fact 3, a lower bound on  
927  $\inf \alpha_{\tau,k,S}$  is obvious,

$$\inf \alpha_{\tau,k,S} \geq \frac{1}{2 \cdot \frac{L_{\max}}{1+\gamma L_{\max}} \gamma} = \frac{1}{2} \left( 1 + \frac{1}{\gamma L_{\max}} \right).$$

928 This means that we have

$$\alpha_{\tau,k,S} \geq \inf \alpha_{\tau,k,S} \geq \frac{1}{2} \left( 1 + \frac{1}{\gamma L_{\max}} \right).$$

929 Using the above lower bound in (40), we have

$$\|x_{k+1} - x_\star\|^2 \leq \|x_k - x_\star\|^2 - \inf \alpha_{\tau,k,S} \cdot \gamma \cdot \frac{1}{\tau} \sum_{i \in S_k} \left( M_{f_i}^\gamma(x_k) - \inf M_{f_i}^\gamma \right).$$

930 Taking expectation conditioned on  $x_k$ , and noticing that we are in the interpolation regime, we obtain

$$\mathbb{E}_{S_k} \left[ \|x_{k+1} - x_\star\|^2 \right] \leq \|x_k - x_\star\|^2 - \inf \alpha_{\tau,k,S} \cdot \gamma \cdot (M^\gamma(x_k) - \inf M).$$

---

<sup>5</sup>Same as  $M^\gamma(x)$ , its smoothness constant can be much better.

931 Using Lemma 10, we have

$$\mathbb{E}_{S_k} \left[ \|x_{k+1} - x_\star\|^2 \right] \stackrel{\text{Lemma 10}}{\leq} \|x_k - x_\star\|^2 - \inf \alpha_{\tau,k,S} \cdot \frac{\gamma}{1 + \gamma L_{\max}} \cdot (f(x_k) - \inf f).$$

932 Now, following the exact same steps as in the previous case of [FedExProx-GraDS](#), we result in

$$\mathbb{E} [f(\bar{x}_K)] - \inf f \leq \left( \frac{1}{\gamma} + L_{\max} \right) \cdot \frac{\|x_0 - x_\star\|^2}{\inf \alpha_{\tau,k,S} \cdot K},$$

933 where  $K$  is the total number of iterations,  $\bar{x}_K$  is sampled uniformly at random from the first  $K$ -iterates  
934  $\{x_0, x_1, \dots, x_{K-1}\}$ .

## 935 **G.6 Proof of Corollary 1**

936 If additionally we assume  $f$  is  $\mu$ -strongly convex, then from Lemma 11, we know it indicates the  
937 following star strong convexity of  $M^\gamma$  holds,

$$M^\gamma(x) - M^\gamma(x_\star) \geq \frac{\mu}{1 + \gamma L_{\max}} \cdot \frac{1}{2} \|x - x_\star\|^2.$$

938 Thus, we apply Theorem 3 with  $\tau$ -nice sampling in the star strong convexity case, and obtain the  
939 following result:

$$\mathbb{E} \left[ \|x_K - x_\star\|^2 \right] \stackrel{\text{Theorem 3}}{\leq} \left( 1 - \alpha\gamma(2 - \alpha\gamma L_{\gamma,\tau}) \cdot \frac{\mu}{2} \right)^K \|x_0 - x_\star\|^2.$$

940 Since the convergence here is stated in terms of squared distance to the minimizer, we do not need  
941 further transformation. Notice that the convergence rate in this case,

$$1 - \alpha\gamma(2 - \alpha\gamma L_{\gamma,\tau}) \cdot \frac{\mu}{2},$$

942 is also minimized when  $\alpha = \alpha_{\gamma,\tau} = \frac{1}{\gamma L_{\gamma,\tau}}$ . In case of  $\alpha = \alpha_{\gamma,\tau}$ , the convergence is given by

$$\mathbb{E} \left[ \|x_K - x_\star\|^2 \right] \leq \left( 1 - \frac{\mu}{2L_{\gamma,\tau}} \right)^K \|x_0 - x_\star\|^2.$$

943 This concludes the proof.

## 944 **G.7 Proof of Corollary 2**

945 Similar to the proof of Theorem 2, we start with the following identity

$$\begin{aligned} \|x_{k+1} - x_\star\|^2 &= \|x_k - \alpha'_{k,G} \gamma \nabla M^\gamma(x_k) - x_\star\|^2 \\ &= \|x_k - x_\star\|^2 - \alpha'_{k,G} \gamma \langle \nabla M^\gamma(x_k), x_k - x_\star \rangle + (\alpha'_{k,G})^2 \gamma^2 \|\nabla M^\gamma(x_k)\|^2. \end{aligned} \quad (41)$$

946 The extrapolation parameter can be rewritten as

$$\alpha'_{k,G} = \frac{1 + \gamma L_{\max}}{\gamma L_{\max}} \cdot \frac{\frac{1}{n} \sum_{i=1}^n \|\nabla M_{f_i}^\gamma(x_k)\|^2}{\|\nabla M^\gamma(x_k)\|^2}.$$

947 We have for the last term of (41),

$$\begin{aligned} &(\alpha'_{k,G})^2 \gamma^2 \|\nabla M^\gamma(x_k)\|^2 \\ &= \alpha'_{k,G} \gamma \cdot \left( \gamma + \frac{1}{L_{\max}} \right) \cdot \frac{1}{n} \sum_{i=1}^n \|\nabla M_{f_i}^\gamma(x_k)\|^2 \\ &= \alpha'_{k,G} \gamma \cdot \left( \gamma + \frac{1}{L_{\max}} \right) \cdot \frac{1}{n} \sum_{i=1}^n \|\nabla M_{f_i}^\gamma(x_k) - \nabla M_{f_i}^\gamma(x_\star)\|^2 \\ &\leq \alpha'_{k,G} \gamma \cdot \left( \gamma + \frac{1}{L_{\max}} \right) \cdot \frac{1}{n} \sum_{i=1}^n \frac{L_i}{1 + \gamma L_i} \left( D_{M_{f_i}^\gamma}(x_k, x_\star) + D_{M_{f_i}^\gamma}(x_\star, x_k) \right), \end{aligned}$$

where the last inequality follows from the  $\frac{L_i}{1+\gamma L_i}$ -smoothness of  $M_{f_i}^\gamma$ . Utilizing the monotonicity of  $\frac{x}{1+\gamma x}$ , for  $x > 0$ , we further obtain

$$\begin{aligned}
& (\alpha'_{k,G})^2 \gamma^2 \|\nabla M^\gamma(x_k)\|^2 \\
& \stackrel{\text{Fact 4}}{\leq} \alpha'_{k,G} \gamma \cdot \left( \gamma + \frac{1}{L_{\max}} \right) \cdot \frac{L_{\max}}{1 + \gamma L_{\max}} \cdot \frac{1}{n} \sum_{i=1}^n \left( D_{M_{f_i}^\gamma}(x_k, x_\star) + D_{M_{f_i}^\gamma}(x_\star, x_k) \right) \\
& = \alpha'_{k,G} \gamma \cdot \left( \gamma + \frac{1}{L_{\max}} \right) \cdot \frac{L_{\max}}{1 + \gamma L_{\max}} \cdot (D_{M^\gamma}(x_k, x_\star) + D_{M^\gamma}(x_\star, x_k)) \\
& = \alpha'_{k,G} \gamma (D_{M^\gamma}(x_k, x_\star) + D_{M^\gamma}(x_\star, x_k)). \tag{42}
\end{aligned}$$

For the second term of (41), we have

$$\begin{aligned}
-2\alpha'_{k,G} \gamma \langle \nabla M^\gamma(x_k), x_k - x_\star \rangle &= 2\alpha'_{k,G} \gamma \langle \nabla M^\gamma(x_k), x_\star - x_k \rangle \\
&= 2\alpha'_{k,G} \gamma \langle \nabla M^\gamma(x_k) - \nabla M^\gamma(x_\star), x_\star - x_k \rangle \\
&= -2\alpha'_{k,G} \gamma (D_{M^\gamma}(x_k, x_\star) + D_{M^\gamma}(x_\star, x_k)). \tag{43}
\end{aligned}$$

Plugging (43) and (42) into (41), we obtain

$$\|x_{k+1} - x_\star\|^2 \leq \|x_k - x_\star\|^2 - \alpha'_{k,G} \gamma (D_{M^\gamma}(x_k, x_\star) + D_{M^\gamma}(x_\star, x_k)).$$

Notice that we know that

$$D_{M^\gamma}(x_k, x_\star) \stackrel{(14)}{=} M^\gamma(x_k) - M^\gamma(x_\star), \quad D_{M^\gamma}(x_\star, x_k) \stackrel{(15)}{\geq} 0.$$

As a result, we have

$$\|x_{k+1} - x_\star\|^2 \leq \|x_k - x_\star\|^2 - \alpha'_{k,G} \gamma (M^\gamma(x_k) - M^\gamma(x_\star)).$$

Summing up the above recursion for  $k = 0, 1, \dots, K-1$ , we notice that many of them telescope, we obtain

$$\gamma \sum_{k=0}^{K-1} \alpha'_{k,G} (M^\gamma(x_k) - \inf M^\gamma) \leq \|x_0 - x_\star\|^2.$$

Denote  $p_k = \alpha'_{k,G} / \sum_{k=0}^{K-1} \alpha'_{k,G}$  for  $k = 0, 1, \dots, K-1$ . If we sample  $\bar{x}_K$  randomly according to probabilities  $p_k$  from the first  $K$  iterates  $\{x_0, x_1, \dots, x_{K-1}\}$ , we can further write the above recursion as

$$\mathbb{E}[M^\gamma(\bar{x}_K)] - \inf M^\gamma \leq \frac{1}{\gamma} \cdot \frac{\|x_0 - x_\star\|^2}{\sum_{k=0}^{K-1} \alpha'_{k,G}}.$$

Utilizing the local bound in Lemma 10, we further obtain,

$$\mathbb{E}[f(\bar{x}^K)] - f^{\inf} \leq \left( \frac{1}{\gamma} + L_{\max} \right) \cdot \frac{\|x_0 - x_\star\|^2}{\sum_{k=0}^{K-1} \alpha'_{k,G}}.$$

This concludes the proof.

## H Missing proofs of lemmas

### H.1 Proof of Lemma 1

Notice that since  $f$  is proper, closed and convex, by Fact 1,  $\text{prox}_{\gamma f}(x)$  is a singleton. We use the notation  $z(x) = \text{prox}_{\gamma f}(x)$ . Using the definition of  $\text{prox}_{\gamma f}(x)$ , we see that

$$\begin{aligned}
M_f^\gamma(x) &= f(z(x)) + \frac{1}{2\gamma} \|z(x) - x\|^2 \\
&= f(\text{prox}_{\gamma f}(x)) + \frac{1}{2\gamma} \|\text{prox}_{\gamma f}(x) - x\|^2.
\end{aligned}$$

Now, assume  $M_f^\gamma(x) = +\infty$ . We have for any  $z \in \mathbb{R}^d$ ,

$$+\infty = M_f^\gamma(x) = f(z(x)) + \frac{1}{2\gamma} \|z(x) - x\|^2 \leq f(z) + \frac{1}{2\gamma} \|z - x\|^2,$$

which means that  $z$  is also optimal, which contradicts the uniqueness  $z(x) = \text{prox}_{\gamma f}(x)$ . This indicates that  $M_f^\gamma(x) < +\infty$ , thus, it is real-valued, which concludes the proof.

## 968 H.2 Proof of Lemma 2

969 Let  $f^*$  be the convex conjugate of  $f$ , using Corollary 6.56 in the book by Beck [2017], we have  
 970  $(M_f^\gamma)^* = f^* + \frac{\gamma}{2} \|\cdot\|^2$ . We know that the convex conjugate of a proper, closed and convex function  
 971 is also proper closed and convex. As a result,  $f^* + \frac{\gamma}{2} \|\cdot\|^2$  is  $\gamma$ -strongly convex. This indicates that  
 972  $(M_f^\gamma)^*$  is  $\gamma$ -strongly convex, which implies  $M_f^\gamma$  is  $\frac{1}{\gamma}$ -smooth. Notice that we have

$$\text{prox}_{\gamma f}(x) = \arg \min_{z \in \mathbb{R}^d} \left\{ f(z) + \frac{1}{2\gamma} \|z - x\|^2 \right\},$$

973 by the definition of proximity operator. Using Theorem 5.30 from Beck [2017], we have

$$\nabla M_f^\gamma(x) = \frac{1}{\gamma} (x - \text{prox}_{\gamma f}(x)).$$

974 This completes the proof.

## 975 H.3 Proof of Lemma 3

976 To prove this lemma, we use Theorem 2.19 in the book by Beck [2017]. From the key observation that  
 977  $M_f^\gamma$  is the infimal convolution of the proper, convex function  $f$  and the real-valued convex function  
 978  $\frac{1}{2\gamma} \|\cdot\|^2$ , we deduce that  $M_f^\gamma$  is convex. This completes the proof.

## 979 H.4 Proof of Lemma 4

980 Let  $f^*$  be the convex conjugate of  $f$ . From Corollary 6.56 in the book by Beck [2017], it holds that  
 981  $(M_f^\gamma)^* = f^* + \frac{\gamma}{2} \|\cdot\|^2$ . Since  $f$  is  $L$ -smooth, we deduce that  $f^*$  is  $\frac{1}{L}$ -strongly convex, and thus  
 982  $(M_f^\gamma)^*$  is  $\frac{1}{L} + \gamma$ -strongly convex. This suggests that  $(M_f^\gamma)^*$  is  $\frac{1+\gamma L}{L}$ -strongly convex, which in  
 983 turn implies  $M_f^\gamma$  is  $\frac{L}{1+\gamma L}$ -smooth. This completes the proof.

## 984 H.5 Proof of Lemma 5

985 Notice that since  $M_f^\gamma$  is convex and differentiable, the condition  $\nabla M_f^\gamma(x) = 0$  gives its set of  
 986 minimizers. This optimality condition can be written exactly as  $x = \text{prox}_{\gamma f}(x)$  according to  
 987 Lemma 2. Using Lemma 12, we know this condition also gives the set of minimizers of  $f$ , which  
 988 suggests that  $f$  and  $M_f^\gamma$  have the same set of minimizers. Pick any  $x_* \in \mathbb{R}^d$  that is a minimizer of  $f$ ,  
 989 using Lemma 1, we have

$$\begin{aligned} \inf M_f^\gamma &= M_f^\gamma(x_*) \\ &= f(\text{prox}_{\gamma f}(x_*)) + \frac{1}{2\gamma} \|x_* - \text{prox}_{\gamma f}(x_*)\|^2 \\ &= f(x_*) = \inf f. \end{aligned}$$

990 This completes the proof.

## 991 H.6 Proof of Lemma 6

992 For any  $x \in \mathbb{R}^d$ , we have

$$\begin{aligned} M_f^\gamma(x) &= \min_{z \in \mathbb{R}^d} \left\{ f(z) + \frac{1}{2\gamma} \|z - x\|^2 \right\} \\ &\leq f(x) + \frac{1}{2\gamma} \|x - x\|^2 \\ &= f(x). \end{aligned}$$

993 This completes the proof.

994 **H.7 Proof of Lemma 7**

995 From Lemma 3 and Lemma 4, we immediately obtain that each  $M_{f_i}^\gamma$  is convex and  $\frac{L_i}{1+\gamma L_i}$ -smooth.  
 996 This immediately suggests that  $M = \frac{1}{n} \sum_{i=1}^n M_{f_i}^\gamma$  is convex and  $L_\gamma$ -smooth with

$$L_\gamma \leq \frac{1}{n} \sum_{i=1}^n \frac{L_i}{1+\gamma L_i}.$$

997 Then by Lemma 13, we have

$$\frac{1}{n^2} \sum_{i=1}^n \frac{L_i}{1+\gamma L_i} \stackrel{\text{Lemma 13}}{\leq} L_\gamma.$$

998 Combing the above two inequalities, we have

$$\frac{1}{n^2} \sum_{i=1}^n \frac{L_i}{1+\gamma L_i} \leq L_\gamma \leq \frac{1}{n} \sum_{i=1}^n \frac{L_i}{1+\gamma L_i}.$$

999 We then look at the condition number defined in Theorem 1. It is easy to verify that

$$C(\gamma, n, \alpha_{\gamma, n}) = L_\gamma (1 + \gamma L_{\max}) \quad \text{and} \quad C(\gamma, 1, \alpha_{\gamma, 1}) = L_{\max}.$$

1000 As a result,

$$\begin{aligned} C(\gamma, n, \alpha_{\gamma, n}) &= L_\gamma (1 + \gamma L_{\max}) \\ &\leq \frac{1}{n} \sum_{i=1}^n L_i \cdot \frac{1 + \gamma L_{\max}}{1 + \gamma L_i} \\ &\leq L_{\max} = C(\gamma, n, 1), \end{aligned}$$

1001 Notice that we can write  $C(\gamma, \tau, \alpha_{\gamma, \tau})$  as an interpolation between  $C(\gamma, n, \alpha_{\gamma, n})$  and  $C(\gamma, 1, \alpha_{\gamma, 1})$ ,  
 1002 therefore

$$L_\gamma (1 + \gamma L_{\max}) \leq C(\gamma, n, \alpha_{\gamma, n}) \leq C(\gamma, \tau, \alpha_{\gamma, \tau}) \leq C(\gamma, 1, \alpha_{\gamma, 1}) = L_{\max}.$$

1003 In cases where there exists at least one  $L_i < L_{\max}$ , we have

$$\frac{1}{n} \sum_{i=1}^n L_i \cdot \frac{1 + \gamma L_{\max}}{1 + \gamma L_i} < L_{\max}.$$

1004 which is true for all  $0 < \gamma < +\infty$ . Thus,  $C(\gamma, n, \alpha_{\gamma, n}) < C(\gamma, \tau, \alpha_{\gamma, \tau}) < L_{\max} = C(\gamma, 1, \alpha_{\gamma, 1})$ .

1005 Now we give an example that when all  $L_i = L_{\max}$ , still  $C(\gamma, n, \alpha_{\gamma, n}) = \frac{1}{n} C(\gamma, 1, \alpha_{\gamma, 1}) = \frac{1}{n} L_{\max}$ .

1006

1007 **Example 1.** Consider the setting where  $f_i : \mathbb{R}^d \mapsto \mathbb{R}$  is defined as  $f_i(x) = \frac{\theta}{2} x_i^2$  for some  $\theta > 0$ .  
 1008 Here  $x_i$  denotes the  $i$ -th coordinate of the vector  $x \in \mathbb{R}^d$ ,  $f : \mathbb{R}^d \mapsto \mathbb{R}$  is given by  $f(x) = \frac{\theta}{2n} \|x\|^2$ .  
 1009 It is easy to show that for each  $f_i$  is a convex,  $\theta$ -smooth function and the smoothness constant  $\theta$   
 1010 cannot be improved since

$$\frac{\theta}{2} \|x\|^2 - \frac{\theta}{2} x_i^2 = \frac{\theta}{2} \sum_{j \neq i} x_j^2.$$

1011 For  $f(x) = \frac{\theta}{2n} \|x\|^2$ , apparently, it is  $\frac{\theta}{n}$ -smooth and convex. We have the following formula for the  
 1012 Moreau envelope of  $f_i(x)$ ,

$$M_{f_i}^\gamma(x) = \frac{1}{2} \cdot \frac{\theta}{1 + \gamma \theta} \cdot x_i^2.$$

1013 As expected, each one of them is convex and  $\frac{\theta}{1+\gamma\theta}$ -smooth. For  $M^\gamma(x)$ , it is given by

$$M^\gamma(x) = \frac{1}{n} \sum_{i=1}^n M_{f_i}^\gamma(x) = \frac{1}{2} \cdot \frac{\theta}{n(1 + \gamma \theta)} \cdot \|x\|^2,$$

1014 thus, we know it is convex and  $L_\gamma = \frac{\theta}{n(1+\gamma\theta)}$ -smooth. In this case

$$\frac{L_{\max}}{L_\gamma (1 + \gamma L_{\max})} = \frac{\theta}{\frac{\theta}{n(1+\gamma\theta)} \cdot (1 + \gamma \theta)} = n,$$

1015 which is

$$L_\gamma (1 + \gamma L_{\max}) = C(\gamma, n, \alpha_{\gamma, n}) = \frac{1}{n} C(\gamma, 1, \alpha_{\gamma, 1}) = \frac{1}{n} L_{\max}.$$

## 1016 H.8 Proof of Lemma 8

1017 By Lemma 5, we know that  $f_i$  and  $M_{f_i}^\gamma$  have the same set of minimizers and minimum. Denote the  
 1018 set of minimizers as  $\mathcal{X}_i$ , since we are in the interpolation regime, we know that the set of minimizers  
 1019 of  $f$  is given by,

$$\mathcal{X} = \bigcap_{i=1}^n \mathcal{X}_i \neq \emptyset.$$

1020 Now we prove that every  $x$  in  $\mathcal{X}$  is a minimizer of  $M = \frac{1}{n} \sum_{i=1}^n M_{f_i}^\gamma$ . This is true since  $x \in \mathcal{X}$   
 1021 minimizes each  $f_i$ , thus  $M_{f_i}^\gamma$  at the same time. The minimum is given by

$$\inf M = \frac{1}{n} \sum_{i=1}^n \inf M_{f_i}^\gamma = \frac{1}{n} \sum_{i=1}^n \inf f_i = \inf f.$$

1022 We then prove that every  $x \notin \mathcal{X}$  is not a minimizer of  $f$ . If  $x \notin \mathcal{X}$ , there exists at least one set  $\mathcal{X}_j$   
 1023 such that  $x \notin \mathcal{X}_j$ . Thus  $M_{f_j}^\gamma(x) > \inf M_{f_j}^\gamma$ . This indicates that  $M^\gamma(x) > \inf M$ , which means  
 1024  $x \notin \mathcal{X}$  is not a minimizer of  $M$ .

## 1025 H.9 Proof of Lemma 9

1026 From Lemma 6, it is clear that  $M_f^\gamma$  is a global lower bound of  $f$  satisfying  $M_f^\gamma(x) \leq f(x)$  for any  
 1027  $x \in \mathbb{R}^d$  and  $\gamma > 0$ . Notice that the definition of  $M^\gamma$  indicates that

$$\begin{aligned} M^\gamma(x) &= \frac{1}{n} \sum_{i=1}^n M_{f_i}^\gamma(x) \\ &= \frac{1}{n} \sum_{i=1}^n \min_{z_i \in \mathbb{R}^d} \left\{ f_i(z_i) + \frac{1}{2\gamma} \|z_i - x\|^2 \right\} \\ &\leq \min_{z \in \mathbb{R}^d} \left\{ \frac{1}{n} \sum_{i=1}^n \left( f_i(z) + \frac{1}{2\gamma} \|z - x\|^2 \right) \right\} \\ &= \min_{z \in \mathbb{R}^d} \left\{ \frac{1}{n} \sum_{i=1}^n f_i(z) + \frac{1}{2\gamma} \|z - x\|^2 \right\} \\ &= M_f^\gamma(x), \end{aligned}$$

1028 holds for any  $x \in \mathbb{R}^d$  and  $\gamma > 0$ . Combining the above result, we have  $M^\gamma(x) \leq M_f^\gamma(x) \leq f(x)$   
 1029 for any  $x \in \mathbb{R}^d$  and  $\gamma > 0$ . Notice that in Lemma 8, we have already shown that  $M^\gamma$  and  $f$  have the  
 1030 same set of minimizers and minimum in the interpolation regime. A direct application of Lemma 5  
 1031 indicates that  $M_f^\gamma$  and  $f$  have the same set of minimizers and minimum. Therefore, combining the  
 1032 above statement, we know that  $M^\gamma$ ,  $M_f^\gamma$  and  $f$  have the same set of minimizers and minimum. Thus,  
 1033 for any  $x_\star$  belongs to the set of minimizers, we have

$$M^\gamma(x_\star) = M_f^\gamma(x_\star) = f(x_\star).$$

1034 This completes the proof.

## 1035 H.10 Proof of Lemma 10

1036 We start from noticing that according to Lemma 1, the following identity is true for Moreau envelope,

$$M_{f_i}^\gamma(x) = f_i(\text{prox}_{\gamma f_i}(x)) + \frac{1}{2\gamma} \|x - \text{prox}_{\gamma f_i}(x)\|^2. \quad (44)$$

1037 For the second squared norm term, we have the following inequality due to the smoothness of each  $f_i$   
 1038 and the fact that  $\nabla f_i(\text{prox}_{\gamma f_i}(x)) = \frac{1}{\gamma}(x - \text{prox}_{\gamma f_i}(x))$ ,

$$\begin{aligned} \|x - \text{prox}_{\gamma f_i}(x)\|^2 &= \langle x - \text{prox}_{\gamma f_i}(x), x - \text{prox}_{\gamma f_i}(x) \rangle \\ &= \gamma \langle \nabla f_i(\text{prox}_{\gamma f_i}(x)), x - \text{prox}_{\gamma f_i}(x) \rangle \\ &\geq \gamma (f_i(x) - f_i(\text{prox}_{\gamma f_i}(x))) - \frac{\gamma L_i}{2} \|x - \text{prox}_{\gamma f_i}(x)\|^2, \end{aligned}$$

1039 which leads to the following lower bound:

$$\|x - \text{prox}_{\gamma f_i}(x)\|^2 \geq \frac{1}{\frac{1}{\gamma} + \frac{L_i}{2}} (f_i(x) - f_i(\text{prox}_{\gamma f_i}(x))).$$

1040 Plug in the above inequality into (44) and notice that  $\inf M = \frac{1}{n} \sum_{i=1}^n \inf M_{f_i}^\gamma = \frac{1}{n} \sum_{i=1}^n \inf f_i$ ,  
 1041 we obtain the following lower bound on  $M_{f_i}^\gamma(x)$ ,

$$\begin{aligned} M_{f_i}^\gamma(x) - \inf M_{f_i}^\gamma &\geq f_i(\text{prox}_{\gamma f_i}(x)) + \frac{1}{2 + \gamma L_i} (f_i(x) - f_i(\text{prox}_{\gamma f_i}(x))) - \inf f_i \\ &= \frac{1}{2 + \gamma L_i} (f_i(x) - \inf f_i) + \left(1 - \frac{1}{2 + \gamma L_i}\right) (f_i(\text{prox}_{\gamma f_i}(x)) - \inf f_i). \end{aligned} \quad (45)$$

1042 Now let us look at the term  $f_i(\text{prox}_{\gamma f_i}(x)) - \inf f_i$ . Using again  $L_i$ -smoothness of  $f_i$ , we have

$$f_i(x) - f_i(\text{prox}_{\gamma f_i}(x)) - \langle \nabla f_i(\text{prox}_{\gamma f_i}(x)), x - \text{prox}_{\gamma f_i}(x) \rangle \leq \frac{L_i}{2} \|x - \text{prox}_{\gamma f_i}(x)\|^2.$$

1043 Notice that  $x - \text{prox}_{\gamma f_i}(x) = \gamma \nabla f_i(\text{prox}_{\gamma f_i}(x))$ . As a result, we have,

$$f_i(x) - \gamma \|\nabla f_i(\text{prox}_{\gamma f_i}(x))\|^2 - \frac{L_i \gamma^2}{2} \|\nabla f_i(\text{prox}_{\gamma f_i}(x))\|^2 \leq f_i(\text{prox}_{\gamma f_i}(x)),$$

1044 which is

$$f_i(x) - \inf f_i - \left(\gamma + \frac{\gamma^2 L_i}{2}\right) \|\nabla f_i(\text{prox}_{\gamma f_i}(x))\|^2 \leq f_i(\text{prox}_{\gamma f_i}(x)) - \inf f_i.$$

1045 Using the interpolation regime assumption, we have

$$\begin{aligned} \|\nabla f_i(\text{prox}_{\gamma f_i}(x))\|^2 &= \|\nabla f_i(\text{prox}_{\gamma f_i}(x)) - \nabla f_i(x_\star)\|^2 \\ &\leq 2L_i D_{f_i}(\text{prox}_{\gamma f_i}(x), x_\star) \\ &= 2L_i (f_i(\text{prox}_{\gamma f_i}(x)) - \inf f_i), \end{aligned}$$

1046 where the inequality is obtained using Fact 3. As a result, we obtain the following bound,

$$\begin{aligned} f_i(\text{prox}_{\gamma f_i}(x)) - \inf f_i &\geq \frac{1}{1 + \gamma L_i(2 + \gamma L_i)} (f_i(x) - \inf f_i) \\ &= \frac{1}{(1 + \gamma L_i)^2} (f_i(x) - \inf f_i). \end{aligned}$$

1047 Plug the above lower bound into (45), we obtain

$$M_{f_i}^\gamma(x) - \inf M_{f_i}^\gamma \geq \frac{1}{1 + \gamma L_i} (f_i(x) - \inf f_i), \quad (46)$$

1048 Notice that we have  $M^\gamma(x) = \frac{1}{n} \sum_{i=1}^n M_{f_i}^\gamma(x)$ . Since we are in the interpolation regime, from  
 1049 Lemma 9, we know that

$$\inf M^\gamma = M^\gamma(x_\star) = \frac{1}{n} \sum_{i=1}^n M_{f_i}^\gamma(x_\star) = \frac{1}{n} \sum_{i=1}^n \inf M_{f_i}^\gamma,$$

1050 and

$$\inf f = f(x_\star) = \frac{1}{n} \sum_{i=1}^n f_i(x_\star) = \frac{1}{n} \sum_{i=1}^n \inf f_i.$$

1051 We average (46) for each  $i \in [n]$  and obtain

$$\begin{aligned} M^\gamma(x) - \inf M^\gamma &\geq \frac{1}{n} \sum_{i=1}^n \frac{1}{1 + \gamma L_i} (f_i(x) - \inf f_i) \\ &\geq \frac{1}{1 + \gamma L_{\max}} \cdot \frac{1}{n} \sum_{i=1}^n (f_i(x) - \inf f_i) \\ &= \frac{1}{1 + \gamma L_{\max}} (f(x) - \inf f). \end{aligned}$$

1052 This concludes the proof.



### 1053 H.11 Proof of Lemma 11

1054 We start with picking any point  $x \in \mathbb{R}^d$ , since we are in the interpolation regime, according to  
 1055 Lemma 9, we have  $M^\gamma(x_\star) = f(x_\star)$ . Applying Lemma 10, we get

$$M^\gamma(x) - M^\gamma(x_\star) \geq \frac{1}{1 + \gamma L_{\max}} (f(x) - f(x_\star)). \quad (47)$$

1056 We know that from the  $\mu$ -strong convexity of  $f$ , we have for any  $x \in \mathbb{R}^d$ ,

$$f(x) - f(x_\star) - \langle \nabla f(x_\star), x - x_\star \rangle \geq \frac{\mu}{2} \|x - x_\star\|^2.$$

1057 Notice that since  $\nabla f(x_\star) = 0$ , we have

$$f(x) - f(x_\star) \geq \frac{\mu}{2} \|x - x_\star\|^2. \quad (48)$$

1058 Combining the above two inequalities (47) and (48), we have

$$M^\gamma(x) - M^\gamma(x_\star) \geq \frac{\mu}{1 + \gamma L_{\max}} \cdot \frac{1}{2} \|x - x_\star\|^2.$$

1059 This concludes the proof.

### 1060 H.12 Proof of Lemma 12

1061 Notice that  $x \in \mathbb{R}^d$  is a minimizer of  $f$  if and only if  $0 \in \partial f(x)$ . This inclusion holds if and only if  
 1062  $0 \in \partial(\gamma f(x))$ , which can be rewritten as  $x - x \in \partial(\gamma f(x))$ . By the equivalence of (i) and (ii) in  
 1063 Fact 2, the above condition is the same as  $x = \text{prox}_{\gamma f}(x)$ .

### 1064 H.13 Proof of Lemma 13

1065 Since each  $f_i$  is  $L_i$ -smooth, the following function is convex for every  $i \in [n]$ ,

$$\frac{L_i}{2} \|x\|^2 - f_i(x).$$

1066 Thus,

$$\frac{\frac{1}{n} \sum_{i=1}^n L_i}{2} \|x\|^2 - \frac{1}{n} \sum_{i=1}^n f_i(x),$$

1067 is also a convex function, which indicates  $f(x)$  is also  $\frac{1}{n} \sum_{i=1}^n L_i$ -smooth. This means that

$$L \leq \frac{1}{n} \sum_{i=1}^n L_i. \quad (49)$$

1068 Now notice that the  $L$ -smoothness of  $f$  is equivalent to the following function being convex

$$\frac{nL}{2} \|x\|^2 - \sum_{i=1}^n f_i(x).$$

1069 Pick any  $j \in [n]$ , we have

$$\frac{nL}{2} \|x\|^2 - \sum_{i=1}^n f_i(x) + \sum_{1 \leq i \neq j \leq n} f_i(x) = \frac{nL}{2} \|x\|^2 - f_j(x).$$

1070 Since all functions are convex and the sum of convex functions is convex,

$$\frac{nL}{2} \|x\|^2 - f_j(x),$$

1071 is convex, which indicates that  $f_j(x)$  is also  $nL$ -smooth. As a result, for every  $j \in [n]$ , we have  
 1072  $nL \geq L_j$ . Summing up the inequality for every  $j \in [n]$ , we have

$$\frac{1}{n^2} \sum_{j=1}^n L_j \leq L. \quad (50)$$

1073 Combining (49) and (50), we have

$$\frac{1}{n^2} \sum_{i=1}^n L_i \leq L \leq \frac{1}{n} \sum_{i=1}^n L_i.$$

1074 In order to demonstrate that both bounds are tight in the above inequality, we consider cases where  
1075 they are identities.

1076 (i): Consider the case that each function  $f_i(x) = \frac{1}{2} \cdot L_i \cdot \|x\|^2$ , it is easy to see that  $f(x) =$   
1077  $\frac{1}{2} \cdot \left(\frac{1}{n} \sum_{i=1}^n L_i\right) \cdot \|x\|^2$ . In this case  $L = \frac{1}{n} \sum_{i=1}^n L_i$ , the upper bound is an identity.

1078 (ii): Consider the case that each function  $f_i(x) = \frac{1}{2} \cdot \theta \cdot x_i^2$ , where  $\theta > 0$  is a constant,  $x_i$  is the  
1079  $i$ -th coordinate of  $x \in \mathbb{R}^d$ . In this case  $f(x) = \frac{1}{2} \cdot \frac{\theta}{n} \|x\|^2$ . It is easy to verify that in this  
1080 case  $L_i = \theta$ ,  $L = \frac{1}{n} \theta$ . Thus  $\frac{1}{n^2} \sum_{i=1}^n L_i = L$ , the lower bound is an identity.

1081 This concludes the proof.

#### 1082 H.14 Proof of Lemma 14

1083 From the definition of  $C(\gamma, \tau, 1)$  and  $C(\gamma, \tau, \alpha_{\gamma, \tau})$ , we know that

$$\frac{C(\gamma, \tau, 1)}{C(\gamma, \tau, \alpha_{\gamma, \tau})} = \frac{1}{\gamma L_{\gamma, \tau} (2 - \gamma L_{\gamma, \tau})}.$$

1084 Now let  $t = \gamma L_{\gamma, \tau}$ , we have the following bound on  $t$  according to the definition of  $L_{\gamma, \tau}$  given in  
1085 Theorem 1.

$$\begin{aligned} t &= \gamma L_{\gamma, \tau} \\ &= \frac{n - \tau}{\tau(n - 1)} \cdot \frac{\gamma L_{\max}}{1 + \gamma L_{\max}} + \frac{n(\tau - 1)}{\tau(n - 1)} \cdot \gamma L_{\gamma}. \end{aligned}$$

1086 Notice that in Lemma 7, we have shown that

$$L_{\gamma} \stackrel{\text{Lemma 7}}{\leq} \frac{1}{n} \sum_{i=1}^n \frac{L_i}{1 + \gamma L_i},$$

1087 and due to Fact 4, we have

$$\frac{1}{n} \sum_{i=1}^n \frac{L_i}{1 + \gamma L_i} \stackrel{\text{Fact 4}}{\leq} \frac{L_{\max}}{1 + \gamma L_{\max}}.$$

1088 As a result,

$$t \leq \frac{n - \tau}{\tau(n - 1)} \cdot \frac{\gamma L_{\max}}{1 + \gamma L_{\max}} + \frac{n(\tau - 1)}{\tau(n - 1)} \cdot \frac{\gamma L_{\max}}{1 + \gamma L_{\max}} = \frac{\gamma L_{\max}}{1 + \gamma L_{\max}} < 1.$$

1089 It is easy to show that  $g(t) = \frac{1}{t(2-t)}$  is monotone decreasing when  $t \in [0, 1]$ , thus

$$\begin{aligned} \frac{C(\gamma, \tau, 1)}{C(\gamma, \tau, \alpha_{\gamma, \tau})} &\geq \frac{1}{\frac{\gamma L_{\max}}{1 + \gamma L_{\max}} \left(1 - \frac{\gamma L_{\max}}{1 + \gamma L_{\max}}\right)} \\ &= 2 + \frac{1}{\gamma L_{\max}} + \gamma L_{\max} \\ &\stackrel{\text{AM-GM}}{\geq} 4, \end{aligned}$$

1090 where the last inequality is due to the AM-GM inequality. This concludes the proof.

1091 **H.15 Proof of Lemma 15**

1092 As suggested by Lemma 7, we have

$$C(\gamma, n, \alpha_{\gamma, n}) \leq C(\gamma, \tau, \alpha_{\gamma, \tau}) \leq C(\gamma, 1, \alpha_{\gamma, 1}), \quad \forall \tau \in [n].$$

1093 Notice that  $\alpha_{\gamma, \tau}$  is given by

$$\alpha_{\gamma, \tau} = \frac{1}{\gamma L_{\gamma, \tau}},$$

1094 and we know that

$$L_{\gamma, \tau} = \frac{n - \tau}{\tau(1 - n)} \cdot \frac{L_{\max}}{1 + \gamma L_{\max}} + \frac{n(\tau - 1)}{\tau(n - 1)} \cdot L_{\gamma}.$$

1095 From Lemma 7 and Fact 4, we know that

$$L_{\gamma} \stackrel{\text{Lemma 7}}{\leq} \frac{1}{n} \sum_{i=1}^n \frac{L_i}{1 + \gamma L_i} \stackrel{\text{Fact 4}}{\leq} \frac{L_{\max}}{1 + \gamma L_{\max}}.$$

1096 Consequently,  $L_{\gamma, \tau}$  decreases as  $\tau$  increases. Therefore,  $\alpha_{\gamma, \tau}$  increases with the increase of  $\tau$ , as  
1097 illustrated by the following inequality

$$\alpha_{\gamma, 1} \leq \alpha_{\gamma, \tau} \leq \alpha_{\gamma, n}, \quad \forall \tau \in [n].$$

1098 This concludes the proof.

1099 **H.16 Proof of Lemma 16**

1100 We refer the readers to the proof of Lemma 3.1 of [Böhm and Wright \[2021\]](#).

1101 **H.17 Proof of Lemma 17**

1102 We refer the readers to the proof of Proposition 7 of [Yu et al. \[2015\]](#).

1103 **H.18 Proof of Lemma 18**

1104 Observe that since  $0 < \gamma < \frac{1}{\rho}$ , we do have  $f + \frac{1}{2} \cdot \frac{1}{\gamma} \|\cdot\|^2$  being strongly convex. This indicates  
1105 that  $\text{prox}_{\gamma f}$  is always a singleton and therefore  $M_f^{\gamma}$  is differentiable, as suggested by Lemma 16.  
1106 Notice that  $x$  is stationary point of  $M_f^{\gamma}$  if and only if  $\nabla M_f^{\gamma}(x) = 0$ . This is equivalent to  
1107  $\frac{1}{\gamma}(x - \text{prox}_{\gamma f}(x)) = 0$ , which is  $x = \text{prox}_{\gamma f}(x)$ . In addition,  $x = \text{prox}_{\gamma f}(x)$  is equivalent  
1108 to

$$\nabla f(x) + \frac{1}{\gamma}(x - x) = 0,$$

1109 which is  $\nabla f(x) = 0$ . Combining the above statements, we have  $\nabla f(x) = 0$  if and only if  
1110  $\nabla M_f^{\gamma}(x) = 0$ . This suggests that the two functions have the same set of stationarity points.

1111 **H.19 Proof of Lemma 19**

1112 Apply Theorem 1 of [Khaled and Richtárik \[2023\]](#), notice that in this case [GD](#) satisfy the expected  
1113 smoothness assumption given in Assumption 2 of [Khaled and Richtárik \[2023\]](#) with  $A = 0$ ,  $B = 1$   
1114 and  $C = 0$ , we obtain that when the stepsize  $\eta$  satisfies

$$0 < \eta < \frac{1}{LB} = \frac{1}{L},$$

1115 where  $L$  is the smoothness constant of  $f$ , the iterates of [GD](#) satisfy

$$\min_{0 \leq k \leq K-1} \mathbb{E} \left[ \|\nabla f(x_k)\|^2 \right] \leq \frac{2(f(x_0) - \inf f)}{\eta K}.$$

1116 This completes the proof.

## 1117 H.20 Proof of Lemma 20

1118 Notice that we are in the interpolation regime, by Lemma 8, we know that  $f$  and  $M^\gamma$  have the same  
1119 set of minimizers and minimum. As a result,

$$M^\gamma(x_\star) = \frac{1}{n} \sum_{i=1}^n M_{f_i}^\gamma(x_\star) \stackrel{\text{Lemma 8}}{=} f(x_\star). \quad (51)$$

1120 From the above inequality, we obtain that

$$\frac{\frac{1}{n} \sum_{i=1}^n (M_{f_i}^\gamma(x) - M_{f_i}^\gamma(x_\star))}{\gamma \cdot \left\| \frac{1}{n} \sum_{i=1}^n \nabla M_{f_i}^\gamma(x) \right\|^2} \stackrel{(51)}{=} \frac{M^\gamma(x) - M^\gamma(x_\star)}{\gamma \cdot \|\nabla M^\gamma(x)\|^2}.$$

1121 Then by the smoothness of  $M^\gamma$  and Fact 3, we have

$$\begin{aligned} \frac{M^\gamma(x) - M^\gamma(x_\star)}{\gamma \cdot \|\nabla M^\gamma(x)\|^2} &\stackrel{\text{Fact 3}}{\geq} \frac{\frac{1}{2L_\gamma} \|\nabla M^\gamma(x) - \nabla M^\gamma(x_\star)\|^2}{\gamma \cdot \|\nabla M^\gamma(x)\|^2} \\ &= \frac{1}{2\gamma L_\gamma}. \end{aligned}$$

1122 Thus, by combining the above inequalities, we have

$$\frac{\frac{1}{n} \sum_{i=1}^n (M_{f_i}^\gamma(x) - M_{f_i}^\gamma(x_\star))}{\gamma \cdot \left\| \frac{1}{n} \sum_{i=1}^n \nabla M_{f_i}^\gamma(x) \right\|^2} \geq \frac{1}{2\gamma L_\gamma}.$$

1123 Notice that from the definition of  $\alpha_{k,S}$  for [FedExProx-StoPS](#), we have

$$\alpha_{k,S} = \frac{\frac{1}{n} \sum_{i=1}^n (M_{f_i}^\gamma(x_k) - M_{f_i}^\gamma(x_\star))}{\gamma \cdot \left\| \frac{1}{n} \sum_{i=1}^n \nabla M_{f_i}^\gamma(x_k) \right\|^2} \geq \frac{1}{2\gamma L_\gamma}.$$

1124 Therefore, using the above lower bound, it is straight forward to further relax (12) to

$$\mathbb{E} [f(\bar{x}^K)] - \inf f \leq 2L_\gamma (1 + 2\gamma L_{\max}) \cdot \frac{\|x_0 - x_\star\|^2}{K}.$$

1125 This concludes the proof.

## 1126 I Experiments

1127 In this section, we describe the settings and results of numerical experiments to demonstrate the  
1128 effectiveness of our method.

### 1129 I.1 Experiment settings

1130 We consider the overparameterized linear regression problem in the finite sum setting

$$\min_{x \in \mathbb{R}^d} \left\{ f(x) = \frac{1}{n} \sum_{i=1}^n f_i(x) \right\},$$

1131 where  $d$  is the dimension of the problem,  $n$  is the total number of clients, each function  $f_i$  has the  
1132 following form

$$f_i(x) = \frac{1}{2} \|\mathbf{A}_i x - b_i\|^2,$$

1133 where  $\mathbf{A}_i \in \mathbb{R}^{n_i \times d}$ ,  $b_i \in \mathbb{R}^{n_i}$ . Here  $n_i$  is the number of samples on each client. It is easy to see that  
1134 for each function  $f_i$ , we have

$$\nabla f_i(x) = \mathbf{A}_i^\top \mathbf{A}_i x - \mathbf{A}_i^\top b_i, \quad \text{and} \quad \nabla^2 f_i(x) = \mathbf{A}_i^\top \mathbf{A}_i \succeq \mathbf{O}_d.$$

Thus, it follows that

$$\nabla f(x) = \frac{1}{n} \sum_{i=1}^n (\mathbf{A}_i^\top \mathbf{A}_i x - \mathbf{A}_i^\top b_i), \text{ and } \nabla^2 f(x) = \frac{1}{n} \sum_{i=1}^n \mathbf{A}_i^\top \mathbf{A}_i \succeq \mathbf{O}_d.$$

The problem is therefore convex. Notice that one implicit assumption for the class of proximal point methods in practice is that the proximity operator can be computed efficiently. In the setting of linear regression, we have the following closed form formula for the proximity operator  $\text{prox}_{\gamma f_i}$ , which holds for any  $x \in \mathbb{R}^d$ ,

$$\text{prox}_{\gamma f_i}(x) = \left( \mathbf{A}_i^\top \mathbf{A}_i + \frac{1}{\gamma} \mathbf{I}_d \right)^{-1} \cdot \left( \mathbf{A}_i^\top b_i + \frac{1}{\gamma} x \right). \quad (52)$$

Observe that in the linear regression problem, since we know the closed form expression of each  $f_i$  and  $f$ , we know the corresponding smoothness constant

$$L_i = \lambda_{\max}(\mathbf{A}_i^\top \mathbf{A}_i).$$

Notice that from Lemma 1, we have

$$M_{f_i}^\gamma(x) = f_i(\text{prox}_\gamma(f_i)) + \frac{1}{2\gamma} \|x - \text{prox}_\gamma(f_i)(x)\|^2.$$

Since we know  $\text{prox}_\gamma(f_i)$  in closed form using (52), we also know each local Moreau envelope in closed form, and thus the same for  $M^\gamma = \frac{1}{n} \sum_{i=1}^n M_{f_i}^\gamma$ . As a result, we can deduce  $L_\gamma$  for  $M^\gamma$ . In our experiments, we pick  $d \geq \sum_{i=1}^n n_i$  so that we are in the interpolation regime. Each  $\mathbf{A}_i$  is generated randomly from a uniform distribution between  $[0, 1)$ , and the corresponding vector  $b_i$  is also generated from the same uniform distribution. In order to find a minimizer  $x_*$ , we run gradient descent for sufficient amount of iterations. All the codes for the experiments are written in Python 3.11 with NumPy and SciPy package. The code was run on a machine with AMD Ryzen 9 5900HX Radeon Graphics @ 3.3 GHz and 8 cores 16 threads. For experiment in the small dimension regime, each algorithm considers here only takes seconds to finish. For larger experiments, depending on the specific implementation, the algorithms typically take a few minutes to half an hour to finish. For [FedProx](#), [FedExP](#) and our method [FedExProx](#) in the full participation case, the algorithm for a specific dataset is deterministic, while in case where client sampling is taken into account, the randomness of the algorithms comes from the specific sampling strategy used. Our code is publicly available at the following link: <https://anonymous.4open.science/r/FedExProx-F262/>

## I.2 Large dimension regime

In this section we provide the numerical experiments in the large dimension regime, where  $n_i = 20$  for each  $i \in [n]$ ,  $n = 30$ ,  $d = 900$ .

### I.2.1 Comparison of [FedExProx](#) and [FedProx](#)

In this section, we compare the performance of [FedProx](#) with our method [FedExProx](#) in the full participation case and in the client partial participation case, demonstrating that the extrapolated counterpart outperforms [FedProx](#) in iteration complexity. Notice that here we are only concerned with iteration complexity, since the amount of computations is almost the same for the two algorithms. The only difference is that for [FedExProx](#), instead of simply averaging the iterates obtained from each client, the server performs extrapolation. From Figure 2, it is easy to see that our proposed algorithm [FedExProx](#) outperforms [FedProx](#), which provides numerical evidence for our theoretical findings. Notably, in order to achieve the small level of function value sub-optimality, [FedExProx](#) typically requires only half the number of iterations needed by [FedProx](#), which indicates a factor of 2 speed up in terms of iteration complexity. Another observation is that,  $\alpha_{\gamma, n}$  is decreasing as  $\gamma$  increases, which suggests that when local step sizes are small, the practice of simply averaging the iterates is far from optimal.

We also compare the performance of the two algorithms in the client partial participation setting. As one can observe from Figure 3, [FedExProx](#) still outperforms [FedProx](#) in the client partial participation setting, which further corroborates our theoretical findings. Observe that  $\alpha_{\gamma, \tau}$  here increases as  $\tau$  becomes larger, which coincides with our predictions in Remark 7.

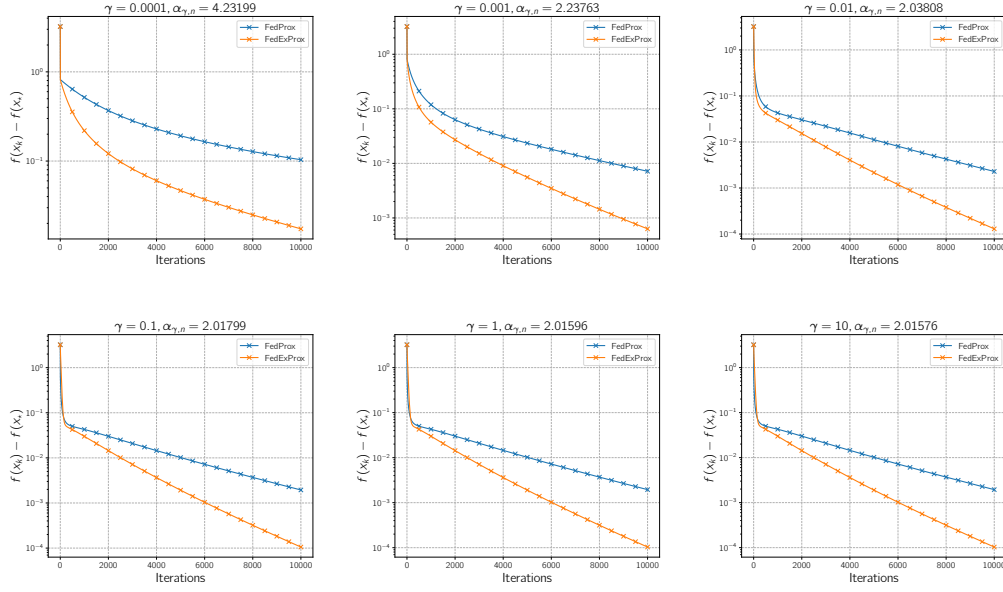

Figure 2: Comparison of convergence of **FedExProx** and **FedProx** in terms of iteration complexity in the full participation setting. For this experiment  $\gamma$  is picked from the set  $\{0.0001, 0.001, 0.01, 0.1, 1, 10\}$ , the  $\alpha_{\gamma,n}$  indicates the optimal constant extrapolation parameter as defined in Theorem 1. For each choice of  $\gamma$ , the two algorithms are run for  $K = 10000$  iterations, respectively.

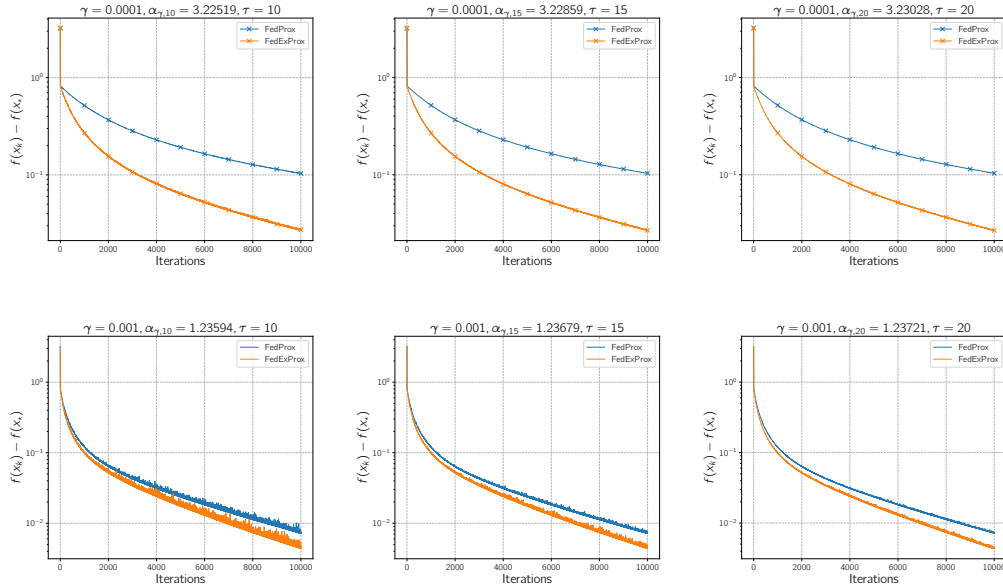

Figure 3: Comparison of convergence of **FedExProx** and **FedProx** in terms of iteration complexity in the client partial participation setting. For this experiment  $\gamma$  is picked from the set  $\{0.0001, 0.001\}$ , the client minibatch size  $\tau$  is chosen from  $\{10, 15, 20\}$  and the  $\alpha_{\gamma,n}$  indicates the optimal constant extrapolation parameter as defined in Theorem 1. For each choice of  $\gamma$  and  $\tau$ , the two algorithms are run for  $K = 10000$  iterations respectively.

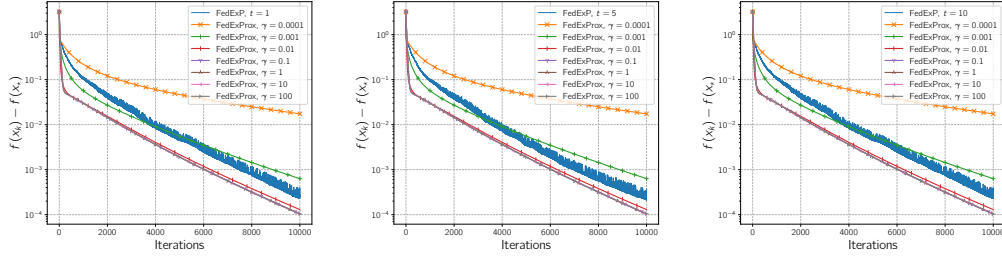

Figure 4: Comparison in terms of iteration complexity for **FedExProx** with different step sizes  $\gamma$  chosen from  $\{0.0001, 0.001, 0.01, 1, 10, 100\}$  in the full participation setting. In the figure, we use **FedExP** with different iterations of local training  $t \in \{1, 5, 10\}$  as a benchmark in the three sub-figures. The local step size for **FedExP** is set to be the largest possible value  $\frac{1}{6tL_{\max}}$ , where  $L_{\max} = \max_i L_i$ .

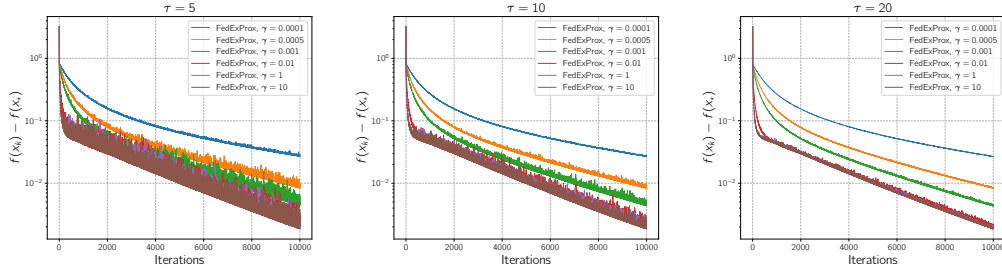

Figure 5: Comparison in terms of iteration complexity for **FedExProx** with different step sizes  $\gamma$  chosen from  $\{0.0001, 0.0005, 0.01, 1, 10\}$  in the client partial participation case. Different client minibatch sizes are used, the minibatch size  $\tau$  is chosen from  $\{5, 10, 20\}$ .

## 1177 I.2.2 Comparison of **FedExProx** with different local step size

1178 In this section, we compare the performance in terms of iteration complexity for **FedExProx** with  
 1179 different local step sizes. We also include **FedExP** as a reference. The local step size of **FedExP** is  
 1180 chosen to be  $\frac{1}{6tL_{\max}}$ , where  $t$  is the number of gradient descent iterations performed by each client  
 1181 for local training,  $L_{\max} = \max_i L_i$ , where  $L_i$  is the smoothness constant of  $f_i$ .

1182 As one can observe from Figure 4, for our proposed method **FedExProx**, the larger  $\gamma$  is, the faster  
 1183 it will converge. However, as  $\gamma$  becomes larger, the improvement in iteration complexity becomes  
 1184 trivial at some point. Note that for different  $\gamma$ , the complexities required to compute the proximity  
 1185 operator locally varies and often larger  $\gamma$  requires more computation than smaller  $\gamma$ . Compared to  
 1186 **FedExP** with the best local step size  $\frac{1}{6tL_{\max}}$ , **FedExProx** with a large enough  $\gamma$  is better in terms  
 1187 of iteration complexity. In the case where the computation of proximity operator is efficient, our  
 1188 method has a better computation complexity as well. Notice that small  $\gamma$  leads to slow down of  
 1189 our method, and we do not claim that the iteration complexity of **FedExProx** is always better than  
 1190 **FedExP**. However, it is provable that **FedExProx** indeed has a better worst case iteration complexity.  
 1191 We want to emphasize a key difference between **FedExP** and our method is that we do not have any  
 1192 constraints on the local step size  $\gamma$ , and our method converges for arbitrary local step size  $\gamma > 0$ ,  
 1193 while for **FedExP**, a misspecified step size could lead to divergence.

1194 We also compare **FedExProx** with different step sizes in the client sampling case, see Figure 5.  
 1195 However, since there is no explicit convergence guarantee for **FedExP** in this case, we did not include  
 1196 **FedExP** in the plot.

1197 In the client partial participation case, the same behavior of how our proposed algorithm **FedExProx**  
 1198 changes according to different local step sizes  $\gamma$  is observed. A small  $\gamma$  leads to slow convergence  
 1199 of the algorithm, while for large  $\gamma$ , the convergence is improved. However, at some point, the  
 1200 improvement becomes trivial.



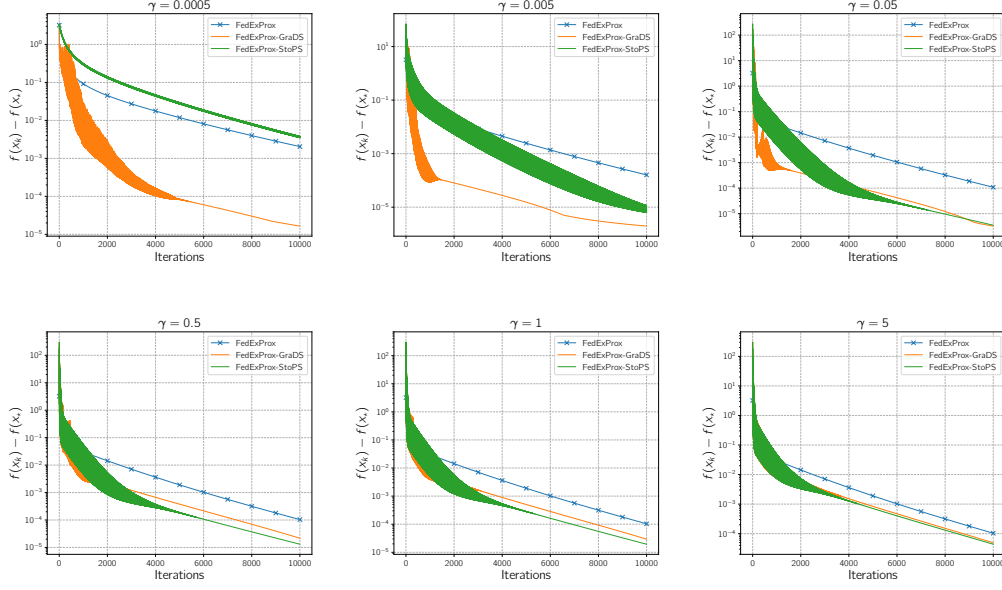

Figure 6: Comparison of [FedExProx](#), [FedExProx-GraDS](#) and [FedExProx-StoPS](#) in terms of iteration complexity with different step sizes  $\gamma$  chosen from  $\{0.0005, 0.0005, 0.05, 0.5, 1, 5\}$  in the full participation setting.

### 1.2.3 Comparison of [FedExProx](#) and its adaptive variants

In this section, we compare [FedExProx](#) and its two adaptive variants [FedExProx-GraDS](#) and [FedExProx-StoPS](#). We first focus on the full participation case. Note that in this case the all the algorithms are deterministic. For [FedExProx-GraDS](#), as it is suggested by Theorem 2, the extrapolation parameter is given by

$$\alpha_k = \alpha_{k,G} := \frac{\frac{1}{n} \sum_{i=1}^n \|x_k - \text{prox}_{\gamma f_i}(x_k)\|^2}{\left\| \frac{1}{n} \sum_{i=1}^n (x_k - \text{prox}_{\gamma f_i}(x_k)) \right\|^2}.$$

The server can use the local iterates it received from each client to compute  $\alpha_{k,G}$  directly. If, in addition, we know  $L_{\max}$ , we can implement a version that has a better theoretical guarantee,

$$\alpha_{k,G} := \frac{1 + \gamma L_{\max}}{\gamma L_{\max}} \cdot \frac{\frac{1}{n} \sum_{i=1}^n \|x_k - \text{prox}_{\gamma f_i}(x_k)\|^2}{\left\| \frac{1}{n} \sum_{i=1}^n (x_k - \text{prox}_{\gamma f_i}(x_k)) \right\|^2}.$$

For [FedExProx-StoPS](#), we have

$$\alpha_k = \alpha_{k,S} = \frac{\frac{1}{n} \sum_{i=1}^n \left( M_{f_i}^\gamma(x_k) - \inf M_{f_i}^\gamma \right)}{\gamma \left\| \frac{1}{n} \sum_{i=1}^n \nabla M_{f_i}^\gamma(x_k) \right\|^2}.$$

In order to implement  $\alpha_{k,S}$ , the server requires each client to send the function value of its Moreau envelope at the current iterate to it, and we need to know each  $\inf M_{f_i}^\gamma$  which, according to Lemma 5, is the same as  $\inf f_i$ .

From Figure 6, we can observe that in all cases when  $\gamma$  is sufficiently large, [FedExProx-StoPS](#) is the best among the three algorithms considered, and [FedExProx-GraDS](#) outperforms [FedExProx](#), this provides numerical evidence for the effectiveness of our proposed algorithms. In the cases when  $\gamma$  is small, the convergence of [FedExProx-GraDS](#) seems to be better than the other two algorithms. We also plot the difference of extrapolation parameter used by the algorithms in each iteration. From Figure 7, observe that when  $\gamma$  is small,  $\alpha_{k,G}$  is often much larger than  $\alpha_{k,S}$ , resulting in better convergence of [FedExProx-GraDS](#) as observed in the first two plots of Figure 6. When  $\gamma$

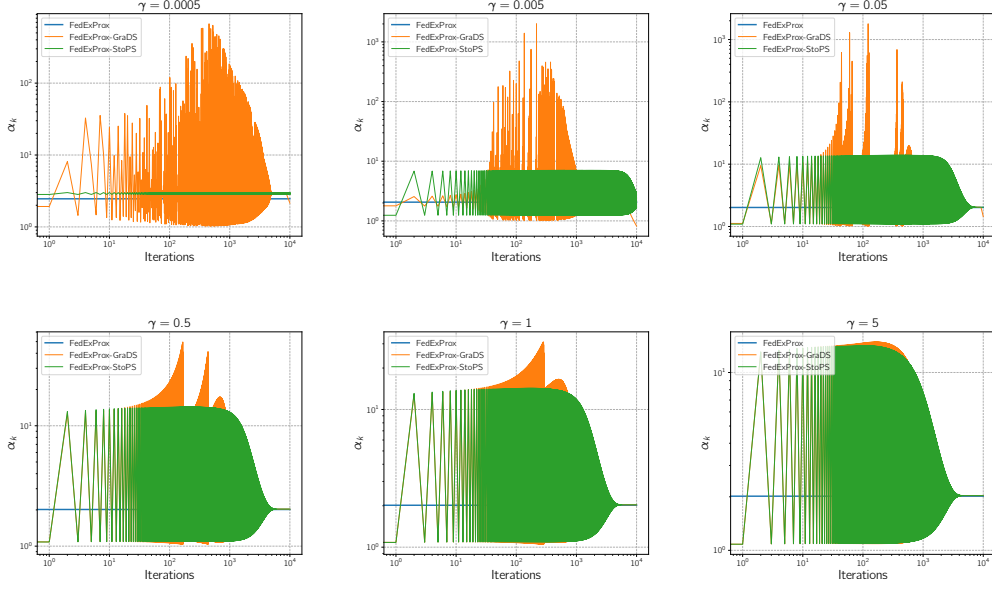

Figure 7: Comparison of the extrapolation parameter  $\alpha_k$  used by [FedExProx](#), [FedExProx-GraDS](#) and [FedExProx-StoPS](#) in each iteration with different step sizes  $\gamma$  chosen from  $\{0.0005, 0.005, 0.05, 0.5, 1, 5\}$  in the full participation setting.

1219 becomes larger,  $\alpha_{k,G}$  and  $\alpha_{k,S}$  become comparable, and their performance is also comparable, with  
 1220 [FedExProx-StoPS](#) slightly better than [FedExProx-GraDS](#).

1221 We also conduct the experiment where we take client partial participation into account. We can  
 1222 observe from Figure 8 that in all cases, the two adaptive variants [FedExProx-GraDS-PP](#) and  
 1223 [FedExProx-StoPS-PP](#) outperform [FedExProx](#) in iteration complexity, and between the two adap-  
 1224 tive variants, [FedExProx-GraDS](#) is the better one almost all the time. However, [FedExProx-GraDS](#)  
 1225 seems to be more stable than [FedExProx-StoPS](#), especially when  $\gamma$  is small.

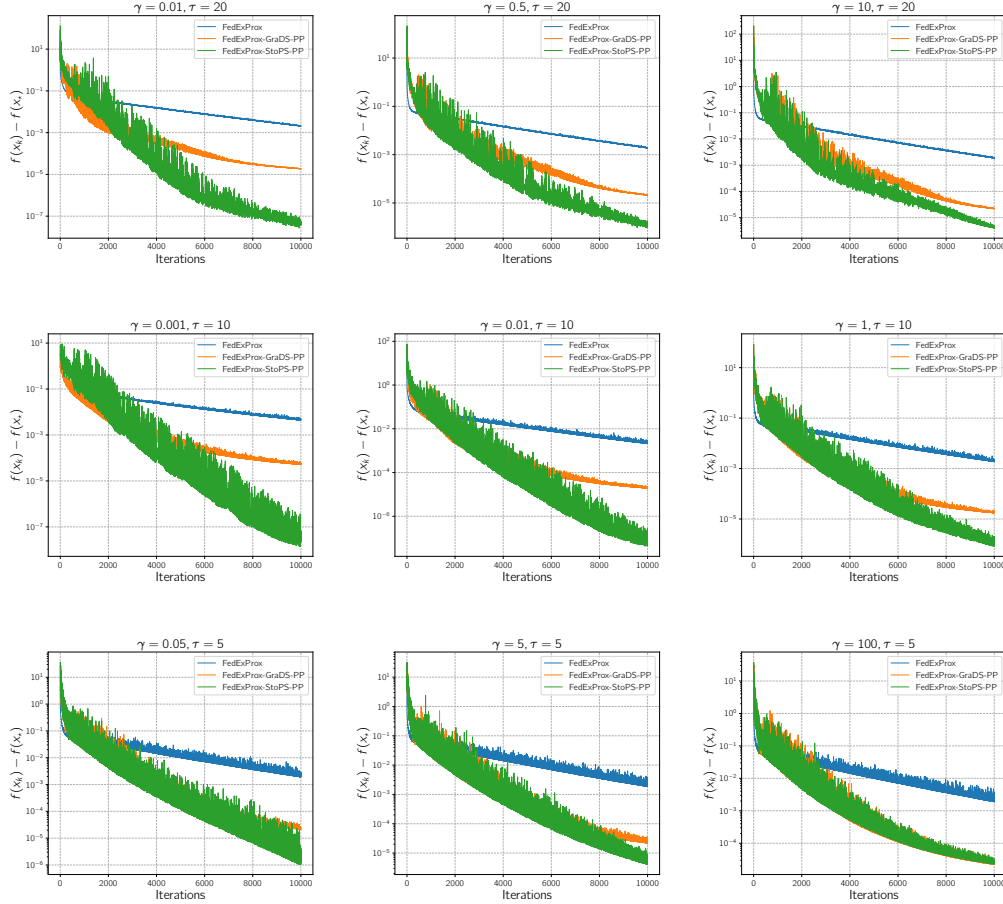

Figure 8: Comparison of [FedExProx](#), [FedExProx-GraDS](#) and [FedExProx-StoPS](#) in terms of iteration complexity with different step sizes  $\gamma$  in the client partial participation (PP) setting. The client minibatch size is chosen from  $\{5, 10, 20\}$ , for each minibatch size, a step size  $\gamma \in \{0.001, 0.005, 0.1, 0.5, 1, 5, 10, 50, 100, 500\}$  is randomly selected.

## NeurIPS Paper Checklist

### 1. Claims

Question: Do the main claims made in the abstract and introduction accurately reflect the paper’s contributions and scope?

Answer: [\[Yes\]](#)

Justification: The abstract and introduction section accurately reflect the contributions made in this paper, which are mainly presented in Section 3, Section 4 and some parts of the Appendix.

Guidelines:

- The answer NA means that the abstract and introduction do not include the claims made in the paper.
- The abstract and/or introduction should clearly state the claims made, including the contributions made in the paper and important assumptions and limitations. A No or NA answer to this question will not be perceived well by the reviewers.
- The claims made should match theoretical and experimental results, and reflect how much the results can be expected to generalize to other settings.
- It is fine to include aspirational goals as motivation as long as it is clear that these goals are not attained by the paper.

## 2. Limitations

Question: Does the paper discuss the limitations of the work performed by the authors?

Answer: [\[Yes\]](#)

Justification: The limitations of the work are discussed in Section 5.1.

Guidelines:

- The answer NA means that the paper has no limitation while the answer No means that the paper has limitations, but those are not discussed in the paper.
- The authors are encouraged to create a separate "Limitations" section in their paper.
- The paper should point out any strong assumptions and how robust the results are to violations of these assumptions (e.g., independence assumptions, noiseless settings, model well-specification, asymptotic approximations only holding locally). The authors should reflect on how these assumptions might be violated in practice and what the implications would be.
- The authors should reflect on the scope of the claims made, e.g., if the approach was only tested on a few datasets or with a few runs. In general, empirical results often depend on implicit assumptions, which should be articulated.
- The authors should reflect on the factors that influence the performance of the approach. For example, a facial recognition algorithm may perform poorly when image resolution is low or images are taken in low lighting. Or a speech-to-text system might not be used reliably to provide closed captions for online lectures because it fails to handle technical jargon.
- The authors should discuss the computational efficiency of the proposed algorithms and how they scale with dataset size.
- If applicable, the authors should discuss possible limitations of their approach to address problems of privacy and fairness.
- While the authors might fear that complete honesty about limitations might be used by reviewers as grounds for rejection, a worse outcome might be that reviewers discover limitations that aren't acknowledged in the paper. The authors should use their best judgment and recognize that individual actions in favor of transparency play an important role in developing norms that preserve the integrity of the community. Reviewers will be specifically instructed to not penalize honesty concerning limitations.

## 3. Theory Assumptions and Proofs

Question: For each theoretical result, does the paper provide the full set of assumptions and a complete (and correct) proof?

Answer: [\[Yes\]](#)

Justification: Full set of assumptions and a complete and correct proof are described for every fact, lemma, theorem and corollary appeared in this paper.

Guidelines:

- The answer NA means that the paper does not include theoretical results.
- All the theorems, formulas, and proofs in the paper should be numbered and cross-referenced.
- All assumptions should be clearly stated or referenced in the statement of any theorems.
- The proofs can either appear in the main paper or the supplemental material, but if they appear in the supplemental material, the authors are encouraged to provide a short proof sketch to provide intuition.
- Inversely, any informal proof provided in the core of the paper should be complemented by formal proofs provided in appendix or supplemental material.
- Theorems and Lemmas that the proof relies upon should be properly referenced.

## 4. Experimental Result Reproducibility

Question: Does the paper fully disclose all the information needed to reproduce the main experimental results of the paper to the extent that it affects the main claims and/or conclusions of the paper (regardless of whether the code and data are provided or not)?

Answer: [Yes]

Justification: The details of the experiments are included in the experiment section in Appendix I. The code is also provided in the corresponding link.

Guidelines:

- The answer NA means that the paper does not include experiments.
- If the paper includes experiments, a No answer to this question will not be perceived well by the reviewers: Making the paper reproducible is important, regardless of whether the code and data are provided or not.
- If the contribution is a dataset and/or model, the authors should describe the steps taken to make their results reproducible or verifiable.
- Depending on the contribution, reproducibility can be accomplished in various ways. For example, if the contribution is a novel architecture, describing the architecture fully might suffice, or if the contribution is a specific model and empirical evaluation, it may be necessary to either make it possible for others to replicate the model with the same dataset, or provide access to the model. In general, releasing code and data is often one good way to accomplish this, but reproducibility can also be provided via detailed instructions for how to replicate the results, access to a hosted model (e.g., in the case of a large language model), releasing of a model checkpoint, or other means that are appropriate to the research performed.
- While NeurIPS does not require releasing code, the conference does require all submissions to provide some reasonable avenue for reproducibility, which may depend on the nature of the contribution. For example
  - (a) If the contribution is primarily a new algorithm, the paper should make it clear how to reproduce that algorithm.
  - (b) If the contribution is primarily a new model architecture, the paper should describe the architecture clearly and fully.
  - (c) If the contribution is a new model (e.g., a large language model), then there should either be a way to access this model for reproducing the results or a way to reproduce the model (e.g., with an open-source dataset or instructions for how to construct the dataset).
  - (d) We recognize that reproducibility may be tricky in some cases, in which case authors are welcome to describe the particular way they provide for reproducibility. In the case of closed-source models, it may be that access to the model is limited in some way (e.g., to registered users), but it should be possible for other researchers to have some path to reproducing or verifying the results.

## 5. Open access to data and code

Question: Does the paper provide open access to the data and code, with sufficient instructions to faithfully reproduce the main experimental results, as described in supplemental material?

Answer: [Yes]

Justification: The details of the experiments are described in detail in Appendix I, and the code is given in the corresponding anonymous link.

Guidelines:

- The answer NA means that paper does not include experiments requiring code.
- Please see the NeurIPS code and data submission guidelines (<https://nips.cc/public/guides/CodeSubmissionPolicy>) for more details.
- While we encourage the release of code and data, we understand that this might not be possible, so “No” is an acceptable answer. Papers cannot be rejected simply for not including code, unless this is central to the contribution (e.g., for a new open-source benchmark).
- The instructions should contain the exact command and environment needed to run to reproduce the results. See the NeurIPS code and data submission guidelines (<https://nips.cc/public/guides/CodeSubmissionPolicy>) for more details.
- The authors should provide instructions on data access and preparation, including how to access the raw data, preprocessed data, intermediate data, and generated data, etc.

- The authors should provide scripts to reproduce all experimental results for the new proposed method and baselines. If only a subset of experiments are reproducible, they should state which ones are omitted from the script and why.
- At submission time, to preserve anonymity, the authors should release anonymized versions (if applicable).
- Providing as much information as possible in supplemental material (appended to the paper) is recommended, but including URLs to data and code is permitted.

## 6. Experimental Setting/Details

Question: Does the paper specify all the training and test details (e.g., data splits, hyper-parameters, how they were chosen, type of optimizer, etc.) necessary to understand the results?

Answer: [\[Yes\]](#)

Justification: All the details of the experiments and link to anonymized repository are provided which is enough to understand the experiment.

Guidelines:

- The answer NA means that the paper does not include experiments.
- The experimental setting should be presented in the core of the paper to a level of detail that is necessary to appreciate the results and make sense of them.
- The full details can be provided either with the code, in appendix, or as supplemental material.

## 7. Experiment Statistical Significance

Question: Does the paper report error bars suitably and correctly defined or other appropriate information about the statistical significance of the experiments?

Answer: [\[Yes\]](#)

Justification: The details are depicted in the experiment section, and notice that for the full participation case of our proposed methods, it is deterministic for a specific dataset. No errors are needed in this case.

Guidelines:

- The answer NA means that the paper does not include experiments.
- The authors should answer "Yes" if the results are accompanied by error bars, confidence intervals, or statistical significance tests, at least for the experiments that support the main claims of the paper.
- The factors of variability that the error bars are capturing should be clearly stated (for example, train/test split, initialization, random drawing of some parameter, or overall run with given experimental conditions).
- The method for calculating the error bars should be explained (closed form formula, call to a library function, bootstrap, etc.)
- The assumptions made should be given (e.g., Normally distributed errors).
- It should be clear whether the error bar is the standard deviation or the standard error of the mean.
- It is OK to report 1-sigma error bars, but one should state it. The authors should preferably report a 2-sigma error bar than state that they have a 96% CI, if the hypothesis of Normality of errors is not verified.
- For asymmetric distributions, the authors should be careful not to show in tables or figures symmetric error bars that would yield results that are out of range (e.g. negative error rates).
- If error bars are reported in tables or plots, The authors should explain in the text how they were calculated and reference the corresponding figures or tables in the text.

## 8. Experiments Compute Resources

Question: For each experiment, does the paper provide sufficient information on the computer resources (type of compute workers, memory, time of execution) needed to reproduce the experiments?

1403 Answer: [Yes]

1404 Justification: The computation resources needed for the experiments are described in the  
1405 experiment section.

1406 Guidelines:

- 1407 • The answer NA means that the paper does not include experiments.
- 1408 • The paper should indicate the type of compute workers CPU or GPU, internal cluster,  
1409 or cloud provider, including relevant memory and storage.
- 1410 • The paper should provide the amount of compute required for each of the individual  
1411 experimental runs as well as estimate the total compute.
- 1412 • The paper should disclose whether the full research project required more compute  
1413 than the experiments reported in the paper (e.g., preliminary or failed experiments that  
1414 didn't make it into the paper).

1415 **9. Code Of Ethics**

1416 Question: Does the research conducted in the paper conform, in every respect, with the  
1417 NeurIPS Code of Ethics <https://neurips.cc/public/EthicsGuidelines?>

1418 Answer: [Yes]

1419 Justification: The research conducted in this paper conform with the NeurIPS Code of Ethics  
1420 in every aspect.

1421 Guidelines:

- 1422 • The answer NA means that the authors have not reviewed the NeurIPS Code of Ethics.
- 1423 • If the authors answer No, they should explain the special circumstances that require a  
1424 deviation from the Code of Ethics.
- 1425 • The authors should make sure to preserve anonymity (e.g., if there is a special consid-  
1426 eration due to laws or regulations in their jurisdiction).

1427 **10. Broader Impacts**

1428 Question: Does the paper discuss both potential positive societal impacts and negative  
1429 societal impacts of the work performed?

1430 Answer: [NA]

1431 Justification: No potential social impact is expected by the authors.

1432 Guidelines:

- 1433 • The answer NA means that there is no societal impact of the work performed.
- 1434 • If the authors answer NA or No, they should explain why their work has no societal  
1435 impact or why the paper does not address societal impact.
- 1436 • Examples of negative societal impacts include potential malicious or unintended uses  
1437 (e.g., disinformation, generating fake profiles, surveillance), fairness considerations  
1438 (e.g., deployment of technologies that could make decisions that unfairly impact specific  
1439 groups), privacy considerations, and security considerations.
- 1440 • The conference expects that many papers will be foundational research and not tied  
1441 to particular applications, let alone deployments. However, if there is a direct path to  
1442 any negative applications, the authors should point it out. For example, it is legitimate  
1443 to point out that an improvement in the quality of generative models could be used to  
1444 generate deepfakes for disinformation. On the other hand, it is not needed to point out  
1445 that a generic algorithm for optimizing neural networks could enable people to train  
1446 models that generate Deepfakes faster.
- 1447 • The authors should consider possible harms that could arise when the technology is  
1448 being used as intended and functioning correctly, harms that could arise when the  
1449 technology is being used as intended but gives incorrect results, and harms following  
1450 from (intentional or unintentional) misuse of the technology.
- 1451 • If there are negative societal impacts, the authors could also discuss possible mitigation  
1452 strategies (e.g., gated release of models, providing defenses in addition to attacks,  
1453 mechanisms for monitoring misuse, mechanisms to monitor how a system learns from  
1454 feedback over time, improving the efficiency and accessibility of ML).



## 11. Safeguards

Question: Does the paper describe safeguards that have been put in place for responsible release of data or models that have a high risk for misuse (e.g., pretrained language models, image generators, or scraped datasets)?

Answer: [NA]

Justification: The paper contain no such risks in the authors' expectation.

Guidelines:

- The answer NA means that the paper poses no such risks.
- Released models that have a high risk for misuse or dual-use should be released with necessary safeguards to allow for controlled use of the model, for example by requiring that users adhere to usage guidelines or restrictions to access the model or implementing safety filters.
- Datasets that have been scraped from the Internet could pose safety risks. The authors should describe how they avoided releasing unsafe images.
- We recognize that providing effective safeguards is challenging, and many papers do not require this, but we encourage authors to take this into account and make a best faith effort.

## 12. Licenses for existing assets

Question: Are the creators or original owners of assets (e.g., code, data, models), used in the paper, properly credited and are the license and terms of use explicitly mentioned and properly respected?

Answer: [NA]

Justification: The paper does not use existing assets.

Guidelines:

- The answer NA means that the paper does not use existing assets.
- The authors should cite the original paper that produced the code package or dataset.
- The authors should state which version of the asset is used and, if possible, include a URL.
- The name of the license (e.g., CC-BY 4.0) should be included for each asset.
- For scraped data from a particular source (e.g., website), the copyright and terms of service of that source should be provided.
- If assets are released, the license, copyright information, and terms of use in the package should be provided. For popular datasets, [paperswithcode.com/datasets](https://paperswithcode.com/datasets) has curated licenses for some datasets. Their licensing guide can help determine the license of a dataset.
- For existing datasets that are re-packaged, both the original license and the license of the derived asset (if it has changed) should be provided.
- If this information is not available online, the authors are encouraged to reach out to the asset's creators.

## 13. New Assets

Question: Are new assets introduced in the paper well documented and is the documentation provided alongside the assets?

Answer: [Yes]

Justification: The experiment and code for this paper are well documented. The details of the dataset used is described in detail in the experiment section of the paper.

Guidelines:

- The answer NA means that the paper does not release new assets.
- Researchers should communicate the details of the dataset/code/model as part of their submissions via structured templates. This includes details about training, license, limitations, etc.



- The paper should discuss whether and how consent was obtained from people whose asset is used.
- At submission time, remember to anonymize your assets (if applicable). You can either create an anonymized URL or include an anonymized zip file.

#### 14. Crowdsourcing and Research with Human Subjects

Question: For crowdsourcing experiments and research with human subjects, does the paper include the full text of instructions given to participants and screenshots, if applicable, as well as details about compensation (if any)?

Answer: [NA]

Justification: The paper does not involve crowdsourcing.

Guidelines:

- The answer NA means that the paper does not involve crowdsourcing nor research with human subjects.
- Including this information in the supplemental material is fine, but if the main contribution of the paper involves human subjects, then as much detail as possible should be included in the main paper.
- According to the NeurIPS Code of Ethics, workers involved in data collection, curation, or other labor should be paid at least the minimum wage in the country of the data collector.

#### 15. Institutional Review Board (IRB) Approvals or Equivalent for Research with Human Subjects

Question: Does the paper describe potential risks incurred by study participants, whether such risks were disclosed to the subjects, and whether Institutional Review Board (IRB) approvals (or an equivalent approval/review based on the requirements of your country or institution) were obtained?

Answer: [NA]

Justification: The paper does not involve crowdsourcing.

Guidelines:

- The answer NA means that the paper does not involve crowdsourcing nor research with human subjects.
- Depending on the country in which research is conducted, IRB approval (or equivalent) may be required for any human subjects research. If you obtained IRB approval, you should clearly state this in the paper.
- We recognize that the procedures for this may vary significantly between institutions and locations, and we expect authors to adhere to the NeurIPS Code of Ethics and the guidelines for their institution.
- For initial submissions, do not include any information that would break anonymity (if applicable), such as the institution conducting the review.
